# Supplementary material for: Triphenylphosphine-mediated reaction of dialkyl azodicarboxylate with activated alkenes leading to pyrazolines
Source: Royal Society of Chemistry journal article supplement (doi:10.1039/c2ra21249h), 2012-01-01

## Electronic Supplementary Information

### Triphenylphosphine-mediated Reaction of Dialkyl Azodicarboxylate with Activated Alkenes Leading to Pyrazolines

Shoko Yamazaki,<sup>\*a</sup> Yuta Maenaka,<sup>a</sup> Ken Fujinami,<sup>a</sup> and Yuji Mikata<sup>b</sup>

<sup>a</sup>Department of Chemistry, Nara University of Education, Takabatake-cho, Nara 630-8528, Japan, <sup>b</sup>KYOUSEI Science Center, Nara Women's University, Nara 630-8506, Japan  
yamazaks@nara-edu.ac.jp

#### Table of Contents

|                                                                                                       |               |
|-------------------------------------------------------------------------------------------------------|---------------|
| Figure S1. ORTEP drawing of the pyrazoline derivative <b>3a</b>                                       | Pages S2      |
| Crystallographic data                                                                                 | Pages S3-S25  |
| Figure S2. B3LYP/6-31G*-optimized structures in Scheme 2.                                             | Pages S26-S28 |
| Figure S3. B3LYP/6-31G*-optimized structures in Scheme 4.                                             | Pages S29-S31 |
| Figure S4. B3LYP/6-31G*-optimized structures in Scheme 5.                                             | Page S32      |
| Figure S5. B3LYP/6-31G*-optimized structures of <i>trans</i> - <b>12</b> and <i>cis</i> - <b>12</b> . | Page S33      |
| References                                                                                            | Page S34      |
| Cartesian coordinates of the optimized geometries of Figures S2-5                                     | Pages S35-S55 |
| Copies of <sup>1</sup> H and <sup>13</sup> C NMR spectra                                              | Pages S56-S88 |

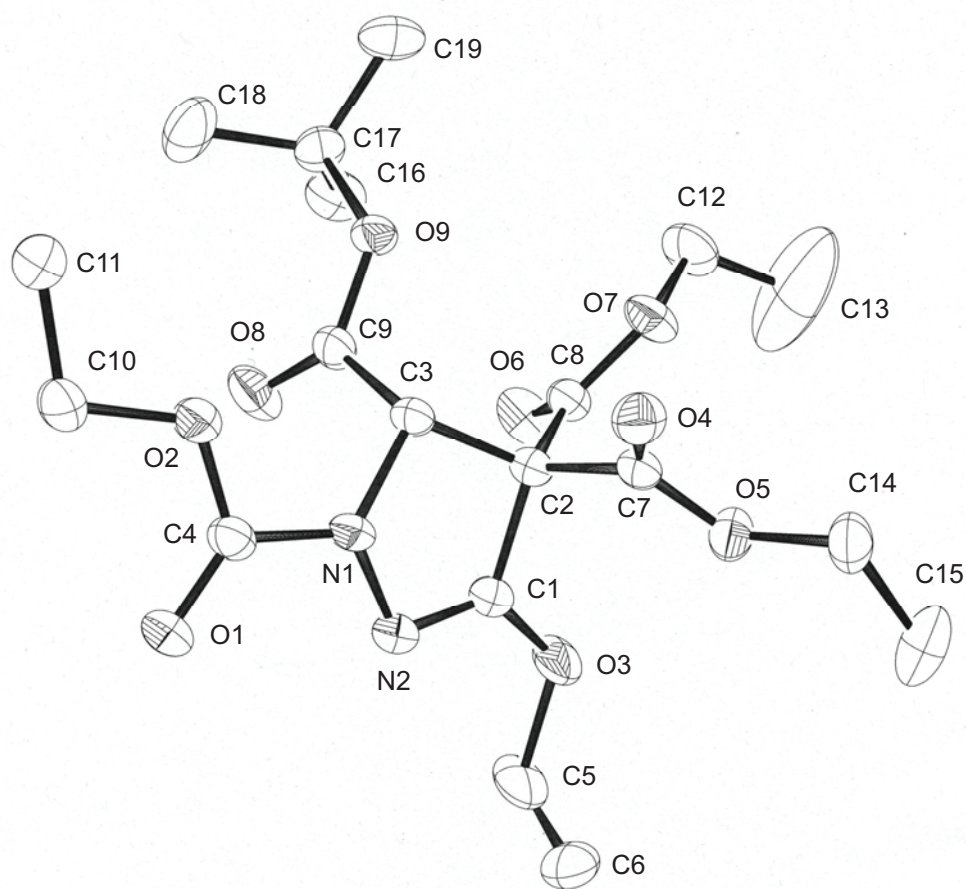

**Figure S1.** ORTEP drawing of the pyrazoline derivative **3a** (thermal ellipsoids are drawn at 50% probability). Hydrogen and disordered carbon (C20) atoms were omitted for clarity.

X-ray Structure Report

for

Compound **3a**

(CCDC 877668)

## Experimental

### Data Collection

A colorless unknown crystal of C<sub>19</sub>H<sub>30</sub>N<sub>2</sub>O<sub>9</sub> having approximate dimensions of 0.600 x 0.300 x 0.300 mm was mounted on a glass fiber. All measurements were made on a Rigaku Mercury70 diffractometer using graphite monochromated Mo-K $\alpha$  radiation.

The crystal-to-detector distance was 45.01 mm.

Cell constants and an orientation matrix for data collection corresponded to a primitive triclinic cell with dimensions:

$$\begin{array}{ll} a = & 9.214(2) \text{ \AA} & \alpha = & 99.651(2)^\circ \\ b = & 9.256(2) \text{ \AA} & \beta = & 96.668(2)^\circ \\ c = & 14.723(3) \text{ \AA} & \gamma = & 112.748(2)^\circ \\ V = & 1118.7(4) \text{ \AA}^3 & & \end{array}$$

For  $Z = 2$  and F.W. = 430.45, the calculated density is 1.278 g/cm<sup>3</sup>. Based on a statistical analysis of intensity distribution, and the successful solution and refinement of the structure, the space group was determined to be:

P-1 (#2)

The data were collected at a temperature of  $-149 \pm 1^\circ\text{C}$  to a maximum  $2\theta$  value of  $54.9^\circ$ . A total of 720 oscillation images were collected. A sweep of data was done using  $\omega$  oscillations from  $-70.0$  to  $110.0^\circ$  in  $0.5^\circ$  steps. The exposure rate was 60.0 [sec./ $^\circ$ ]. The detector swing angle was  $20.10^\circ$ . A second sweep was performed using  $\omega$  oscillations from  $-70.0$  to  $110.0^\circ$  in  $0.5^\circ$  steps. The exposure rate was 60.0 [sec./ $^\circ$ ]. The detector swing angle was  $20.10^\circ$ . The crystal-to-detector distance was 45.01 mm. Readout was performed in the 0.137 mm pixel mode.

### Data Reduction

Of the 8677 reflections that were collected, 4855 were unique ( $R_{\text{int}} = 0.0122$ ); equivalent reflections were merged. Data were collected and processed using CrystalClear (Rigaku).

The linear absorption coefficient,  $\mu$ , for Mo-K $\alpha$  radiation is 1.015 cm<sup>-1</sup>. An empirical absorption correction was applied which resulted in transmission factors ranging from 0.836 to 0.970. The data were corrected for Lorentz and polarization effects.

### Structure Solution and Refinement

The structure was solved by direct methods<sup>2</sup> and expanded using Fourier techniques. The non-hydrogen atoms were refined anisotropically. Hydrogen atoms were refined using the riding model. The final cycle of full-matrix least-squares refinement<sup>3</sup> on  $F^2$  was based on 4855 observed reflections and 280 variable parameters and converged (largest parameter shift was 0.00 times its esd) with unweighted and weighted agreement factors of:

$$R1 = \Sigma ||F_o| - |F_c|| / \Sigma |F_o| = 0.0600$$

$$wR2 = [ \Sigma ( w (F_o^2 - F_c^2)^2 ) / \Sigma w(F_o^2)^2 ]^{1/2} = 0.1697$$

The standard deviation of an observation of unit weight<sup>4</sup> was 1.06. Unit weights were used. The maximum and minimum peaks on the final difference Fourier map corresponded to 0.71 and -0.58 e<sup>-</sup>/Å<sup>3</sup>, respectively.

Neutral atom scattering factors were taken from Cromer and Waber<sup>5</sup>. Anomalous dispersion effects were included in  $F_{\text{calc}}$ <sup>6</sup>; the values for  $\Delta f'$  and  $\Delta f''$  were those of Creagh and McAuley<sup>7</sup>. The values for the mass attenuation coefficients are those of Creagh and Hubbell<sup>8</sup>. All calculations were performed using the CrystalStructure<sup>9</sup> crystallographic software package except for refinement, which was performed using SHELXL-97<sup>10</sup>.

### *References*

(1) CrystalClear: Rigaku Corporation, 1999. CrystalClear Software User's Guide, Molecular Structure Corporation, (c) 2000. J.W. Pflugrath (1999) Acta Cryst. D55, 1718-1725.

(2) SHELX97: Sheldrick, G.M. (2008). Acta Cryst. A64, 112-122.

(3) Least Squares function minimized: (SHELXL97)

$$\sum w(F_o^2 - F_c^2)^2 \quad \text{where } w = \text{Least Squares weights.}$$

(4) Standard deviation of an observation of unit weight:

$$[\sum w(F_o^2 - F_c^2)^2 / (N_o - N_v)]^{1/2}$$

where:  $N_o$  = number of observations  
 $N_v$  = number of variables

(5) Cromer, D. T. & Waber, J. T.; "International Tables for X-ray Crystallography", Vol. IV, The Kynoch Press, Birmingham, England, Table 2.2 A (1974).

(6) Ibers, J. A. & Hamilton, W. C.; Acta Crystallogr., 17, 781 (1964).

(7) Creagh, D. C. & McAuley, W.J. ; "International Tables for Crystallography", Vol C, (A.J.C. Wilson, ed.), Kluwer Academic Publishers, Boston, Table 4.2.6.8, pages 219-222 (1992).

(8) Creagh, D. C. & Hubbell, J.H.; "International Tables for Crystallography", Vol C, (A.J.C. Wilson, ed.), Kluwer Academic Publishers, Boston, Table 4.2.4.3, pages 200-206 (1992).

(9) CrystalStructure 4.0: Crystal Structure Analysis Package, Rigaku Corporation (2000-2010). Tokyo 196-8666, Japan.

(10) SHELX97: Sheldrick, G.M. (2008). Acta Cryst. A64, 112-122.

## EXPERIMENTAL DETAILS

### A. Crystal Data

|                      |                                                                                                                                               |
|----------------------|-----------------------------------------------------------------------------------------------------------------------------------------------|
| Empirical Formula    | C <sub>19</sub> H <sub>30</sub> N <sub>2</sub> O <sub>9</sub>                                                                                 |
| Formula Weight       | 430.45                                                                                                                                        |
| Crystal Color, Habit | colorless, unknown                                                                                                                            |
| Crystal Dimensions   | 0.600 X 0.300 X 0.300 mm                                                                                                                      |
| Crystal System       | triclinic                                                                                                                                     |
| Lattice Type         | Primitive                                                                                                                                     |
| Lattice Parameters   | a = 9.214(2) Å<br>b = 9.256(2) Å<br>c = 14.723(3) Å<br>α = 99.651(2) °<br>β = 96.668(2) °<br>γ = 112.748(2) °<br>V = 1118.7(4) Å <sup>3</sup> |
| Space Group          | P-1 (#2)                                                                                                                                      |
| Z value              | 2                                                                                                                                             |
| D <sub>calc</sub>    | 1.278 g/cm <sup>3</sup>                                                                                                                       |
| F <sub>000</sub>     | 460.00                                                                                                                                        |
| μ(MoKα)              | 1.015 cm <sup>-1</sup>                                                                                                                        |

## B. Intensity Measurements

|                             |                                                                            |
|-----------------------------|----------------------------------------------------------------------------|
| Diffractometer              | Mercury70                                                                  |
| Radiation                   | MoK $\alpha$ ( $\lambda = 0.71070 \text{ \AA}$ )<br>graphite monochromated |
| Voltage, Current            | 50kV, 40mA                                                                 |
| Temperature                 | -149.8°C                                                                   |
| Detector Aperture           | 70 x 70 mm                                                                 |
| Data Images                 | 720 exposures                                                              |
| $\omega$ oscillation Range  | -70.0 - 110.0°                                                             |
| Exposure Rate               | 60.0 sec./°                                                                |
| Detector Swing Angle        | 20.10°                                                                     |
| $\omega$ oscillation Range  | -70.0 - 110.0°                                                             |
| Exposure Rate               | 60.0 sec./°                                                                |
| Detector Swing Angle        | 20.10°                                                                     |
| Detector Position           | 45.01 mm                                                                   |
| Pixel Size                  | 0.137 mm                                                                   |
| $2\theta_{\max}$            | 54.9°                                                                      |
| No. of Reflections Measured | Total: 8677<br>Unique: 4855 ( $R_{\text{int}} = 0.0122$ )                  |
| Corrections                 | Lorentz-polarization<br>Absorption<br>(trans. factors: 0.836 - 0.970)      |



### C. Structure Solution and Refinement

|                                       |                                                                                                                      |
|---------------------------------------|----------------------------------------------------------------------------------------------------------------------|
| Structure Solution                    | Direct Methods (SHELX97)                                                                                             |
| Refinement                            | Full-matrix least-squares on $F^2$                                                                                   |
| Function Minimized                    | $\sum w (F_o^2 - F_c^2)^2$                                                                                           |
| Least Squares Weights                 | $w = 1 / [ \sigma^2(F_o^2) + (0.0885 \cdot P)^2 + 0.6683 \cdot P ]$<br>where $P = (\text{Max}(F_o^2, 0) + 2F_c^2)/3$ |
| $2\theta_{\text{max}}$ cutoff         | 54.90°                                                                                                               |
| Anomalous Dispersion                  | All non-hydrogen atoms                                                                                               |
| No. Observations (All reflections)    | 4855                                                                                                                 |
| No. Variables                         | 280                                                                                                                  |
| Reflection/Parameter Ratio            | 17.34                                                                                                                |
| Residuals: R1 ( $I > 2.00\sigma(I)$ ) | 0.0600                                                                                                               |
| Residuals: R (All reflections)        | 0.0657                                                                                                               |
| Residuals: wR2 (All reflections)      | 0.1697                                                                                                               |
| Goodness of Fit Indicator             | 1.060                                                                                                                |
| Max Shift/Error in Final Cycle        | 0.000                                                                                                                |
| Maximum peak in Final Diff. Map       | 0.71 e <sup>-</sup> /Å <sup>3</sup>                                                                                  |
| Minimum peak in Final Diff. Map       | -0.58 e <sup>-</sup> /Å <sup>3</sup>                                                                                 |

Table 1. Atomic coordinates and  $B_{\text{iso}}/B_{\text{eq}}$  and occupancy

| atom | x         | y         | z           | $B_{\text{eq}}$ | occ   |
|------|-----------|-----------|-------------|-----------------|-------|
| O1   | 1.3811(2) | 0.8598(2) | 0.32493(10) | 2.83(3)         | 1     |
| O2   | 1.2688(2) | 0.7015(2) | 0.42230(9)  | 2.38(3)         | 1     |
| O3   | 0.8735(2) | 0.5759(3) | 0.07240(10) | 3.70(4)         | 1     |
| O4   | 0.7458(2) | 0.6433(2) | 0.33988(10) | 2.61(3)         | 1     |
| O5   | 0.6415(2) | 0.5850(2) | 0.18534(10) | 2.55(3)         | 1     |
| O6   | 0.7917(2) | 0.2529(2) | 0.12336(11) | 3.25(3)         | 1     |
| O7   | 0.6198(2) | 0.2735(2) | 0.21596(10) | 2.72(3)         | 1     |
| O8   | 1.1548(2) | 0.4003(2) | 0.26677(12) | 3.27(3)         | 1     |
| O9   | 0.9488(2) | 0.2928(2) | 0.34072(9)  | 2.07(3)         | 1     |
| N1   | 1.1144(2) | 0.6860(2) | 0.29192(11) | 2.08(3)         | 1     |
| N2   | 1.0897(2) | 0.7010(2) | 0.19835(11) | 2.38(3)         | 1     |
| C1   | 0.9462(3) | 0.6010(3) | 0.16077(13) | 2.32(3)         | 1     |
| C2   | 0.8504(2) | 0.5086(2) | 0.22580(12) | 1.92(3)         | 1     |
| C3   | 0.9892(2) | 0.5407(2) | 0.30700(12) | 1.86(3)         | 1     |
| C4   | 1.2676(2) | 0.7581(2) | 0.34412(13) | 2.09(3)         | 1     |
| C5   | 0.9669(3) | 0.6752(5) | 0.0147(3)   | 6.45(10)        | 1     |
| C6   | 0.9506(5) | 0.8118(5) | 0.0162(3)   | 3.33(7)         | 0.600 |
| C7   | 0.7399(2) | 0.5874(2) | 0.25912(13) | 2.04(3)         | 1     |
| C8   | 0.7508(2) | 0.3297(2) | 0.18031(12) | 2.12(3)         | 1     |
| C9   | 1.0444(2) | 0.4032(2) | 0.30159(13) | 2.05(3)         | 1     |
| C10  | 1.4246(3) | 0.7558(3) | 0.4832(2)   | 2.85(4)         | 1     |
| C11  | 1.4003(3) | 0.6573(3) | 0.5549(2)   | 3.35(4)         | 1     |
| C12  | 0.5134(3) | 0.1025(3) | 0.1815(2)   | 3.37(4)         | 1     |
| C13  | 0.3815(6) | 0.0802(6) | 0.1161(6)   | 15.3(4)         | 1     |
| C14  | 0.5222(3) | 0.6481(3) | 0.2041(2)   | 2.90(4)         | 1     |
| C15  | 0.4575(4) | 0.6734(4) | 0.1124(2)   | 4.33(6)         | 1     |
| C16  | 0.9441(3) | 0.0430(3) | 0.2488(2)   | 3.23(4)         | 1     |
| C17  | 0.9696(3) | 0.1425(2) | 0.3468(2)   | 2.46(4)         | 1     |
| C18  | 1.1336(3) | 0.1867(3) | 0.4052(2)   | 4.34(6)         | 1     |
| C19  | 0.8372(3) | 0.0600(3) | 0.3968(2)   | 3.20(4)         | 1     |
| C20  | 0.8666(8) | 0.7038(9) | -0.0553(5)  | 3.82(11)        | 0.400 |

$$B_{\text{eq}} = 8/3 \pi^2 (U_{11}(aa^*)^2 + U_{22}(bb^*)^2 + U_{33}(cc^*)^2 + 2U_{12}(aa^*bb^*)\cos \gamma + 2U_{13}(aa^*cc^*)\cos \beta + 2U_{23}(bb^*cc^*)\cos \alpha)$$

Table 2. Atomic coordinates and  $B_{\text{iso}}$  involving hydrogen atoms

| atom | x      | y       | z      | $B_{\text{iso}}$ | occ |
|------|--------|---------|--------|------------------|-----|
| H3   | 0.9588 | 0.5645  | 0.3690 | 2.23             | 1   |
| H10A | 1.4654 | 0.8716  | 0.5139 | 3.41             | 1   |
| H10B | 1.5030 | 0.7400  | 0.4466 | 3.41             | 1   |
| H11A | 1.3043 | 0.6520  | 0.5792 | 4.02             | 1   |
| H11B | 1.4941 | 0.7067  | 0.6066 | 4.02             | 1   |
| H11C | 1.3866 | 0.5482  | 0.5260 | 4.02             | 1   |
| H12A | 0.5734 | 0.0449  | 0.1524 | 4.04             | 1   |
| H12B | 0.4767 | 0.0563  | 0.2350 | 4.04             | 1   |
| H13A | 0.3314 | -0.0318 | 0.0798 | 18.35            | 1   |
| H13B | 0.4159 | 0.1523  | 0.0736 | 18.35            | 1   |
| H13C | 0.3037 | 0.1044  | 0.1486 | 18.35            | 1   |
| H14A | 0.5725 | 0.7511  | 0.2521 | 3.49             | 1   |
| H14B | 0.4348 | 0.5704  | 0.2272 | 3.49             | 1   |
| H15A | 0.4228 | 0.5746  | 0.0633 | 5.19             | 1   |
| H15B | 0.5416 | 0.7618  | 0.0951 | 5.19             | 1   |
| H15C | 0.3658 | 0.7004  | 0.1191 | 5.19             | 1   |
| H16A | 1.0269 | 0.1027  | 0.2165 | 3.88             | 1   |
| H16B | 0.8378 | 0.0206  | 0.2135 | 3.88             | 1   |
| H16C | 0.9509 | -0.0588 | 0.2530 | 3.88             | 1   |
| H18A | 1.2167 | 0.2373  | 0.3705 | 5.21             | 1   |
| H18B | 1.1411 | 0.0892  | 0.4184 | 5.21             | 1   |
| H18C | 1.1492 | 0.2622  | 0.4646 | 5.21             | 1   |
| H19A | 0.7331 | 0.0395  | 0.3594 | 3.84             | 1   |
| H19B | 0.8538 | 0.1295  | 0.4586 | 3.84             | 1   |
| H19C | 0.8390 | -0.0423 | 0.4048 | 3.84             | 1   |

Table 3. Anisotropic displacement parameters

| atom | U <sub>11</sub> | U <sub>22</sub> | U <sub>33</sub> | U <sub>12</sub> | U <sub>13</sub> | U <sub>23</sub> |
|------|-----------------|-----------------|-----------------|-----------------|-----------------|-----------------|
| O1   | 0.0252(7)       | 0.0319(7)       | 0.0459(9)       | 0.0031(6)       | 0.0078(6)       | 0.0181(7)       |
| O2   | 0.0247(7)       | 0.0307(7)       | 0.0302(7)       | 0.0053(6)       | 0.0042(6)       | 0.0110(6)       |
| O3   | 0.0264(8)       | 0.0773(12)      | 0.0344(8)       | 0.0104(8)       | 0.0094(6)       | 0.0316(8)       |
| O4   | 0.0367(8)       | 0.0338(7)       | 0.0343(8)       | 0.0189(6)       | 0.0109(6)       | 0.0095(6)       |
| O5   | 0.0274(7)       | 0.0350(7)       | 0.0371(8)       | 0.0156(6)       | 0.0044(6)       | 0.0095(6)       |
| O6   | 0.0377(8)       | 0.0344(8)       | 0.0411(9)       | 0.0072(7)       | 0.0143(7)       | -0.0028(7)      |
| O7   | 0.0294(7)       | 0.0251(7)       | 0.0446(8)       | 0.0039(6)       | 0.0155(6)       | 0.0097(6)       |
| O8   | 0.0312(8)       | 0.0308(7)       | 0.0692(11)      | 0.0139(6)       | 0.0258(8)       | 0.0161(7)       |
| O9   | 0.0274(7)       | 0.0207(6)       | 0.0334(7)       | 0.0100(5)       | 0.0091(6)       | 0.0113(5)       |
| N1   | 0.0236(8)       | 0.0226(7)       | 0.0306(8)       | 0.0042(6)       | 0.0064(6)       | 0.0127(6)       |
| N2   | 0.0258(8)       | 0.0335(8)       | 0.0331(9)       | 0.0097(7)       | 0.0087(7)       | 0.0176(7)       |
| C1   | 0.0249(9)       | 0.0356(10)      | 0.0300(9)       | 0.0109(8)       | 0.0088(8)       | 0.0159(8)       |
| C2   | 0.0232(9)       | 0.0246(8)       | 0.0265(9)       | 0.0086(7)       | 0.0085(7)       | 0.0103(7)       |
| C3   | 0.0224(8)       | 0.0196(8)       | 0.0283(9)       | 0.0064(7)       | 0.0071(7)       | 0.0092(7)       |
| C4   | 0.0254(9)       | 0.0216(8)       | 0.0323(9)       | 0.0080(7)       | 0.0084(8)       | 0.0085(7)       |
| C5   | 0.0341(13)      | 0.153(4)        | 0.067(2)        | 0.022(2)        | 0.0200(13)      | 0.085(3)        |
| C6   | 0.049(3)        | 0.052(2)        | 0.038(2)        | 0.026(2)        | 0.016(2)        | 0.026(2)        |
| C7   | 0.0222(9)       | 0.0216(8)       | 0.0338(10)      | 0.0065(7)       | 0.0079(7)       | 0.0116(7)       |
| C8   | 0.0239(9)       | 0.0268(9)       | 0.0280(9)       | 0.0077(7)       | 0.0062(7)       | 0.0085(7)       |
| C9   | 0.0225(9)       | 0.0219(8)       | 0.0323(9)       | 0.0070(7)       | 0.0062(7)       | 0.0081(7)       |
| C10  | 0.0245(9)       | 0.0380(11)      | 0.0366(11)      | 0.0036(8)       | 0.0013(8)       | 0.0113(9)       |
| C11  | 0.0331(11)      | 0.0534(13)      | 0.0408(12)      | 0.0147(10)      | 0.0055(9)       | 0.0202(10)      |
| C12  | 0.0333(11)      | 0.0258(10)      | 0.058(2)        | -0.0001(9)      | 0.0100(10)      | 0.0109(10)      |
| C13  | 0.088(3)        | 0.063(3)        | 0.342(10)       | -0.017(3)       | -0.127(5)       | 0.055(4)        |
| C14  | 0.0257(10)      | 0.0345(10)      | 0.0519(12)      | 0.0151(8)       | 0.0060(9)       | 0.0092(9)       |
| C15  | 0.052(2)        | 0.058(2)        | 0.057(2)        | 0.0354(13)      | -0.0116(12)     | 0.0006(12)      |
| C16  | 0.0507(13)      | 0.0277(10)      | 0.0484(13)      | 0.0180(10)      | 0.0187(11)      | 0.0090(9)       |
| C17  | 0.0354(10)      | 0.0201(8)       | 0.0412(11)      | 0.0132(8)       | 0.0070(9)       | 0.0112(8)       |
| C18  | 0.047(2)        | 0.0375(12)      | 0.080(2)        | 0.0193(11)      | -0.0088(13)     | 0.0206(12)      |
| C19  | 0.057(2)        | 0.0258(9)       | 0.0433(12)      | 0.0164(10)      | 0.0184(10)      | 0.0162(9)       |
| C20  | 0.046(4)        | 0.063(4)        | 0.041(3)        | 0.021(3)        | 0.012(3)        | 0.029(3)        |

The general temperature factor expression:  $\exp(-2\pi^2(a^2U_{11}h^2 + b^2U_{22}k^2 + c^2U_{33}l^2 + 2a*b*U_{12}hk + 2a*c*U_{13}hl + 2b*c*U_{23}kl))$

Table 4. Bond lengths (Å)

| atom | atom | distance | atom | atom | distance |
|------|------|----------|------|------|----------|
| O1   | C4   | 1.206(3) | O2   | C4   | 1.343(3) |
| O2   | C10  | 1.452(3) | O3   | C1   | 1.331(3) |
| O3   | C5   | 1.458(4) | O4   | C7   | 1.201(3) |
| O5   | C7   | 1.323(3) | O5   | C14  | 1.462(4) |
| O6   | C8   | 1.196(3) | O7   | C8   | 1.325(3) |
| O7   | C12  | 1.463(3) | O8   | C9   | 1.198(3) |
| O9   | C9   | 1.331(3) | O9   | C17  | 1.491(3) |
| N1   | N2   | 1.409(3) | N1   | C3   | 1.466(2) |
| N1   | C4   | 1.370(3) | N2   | C1   | 1.274(2) |
| C1   | C2   | 1.521(3) | C2   | C3   | 1.544(3) |
| C2   | C7   | 1.543(3) | C2   | C8   | 1.531(3) |
| C3   | C9   | 1.537(3) | C5   | C6   | 1.327(7) |
| C5   | C20  | 1.430(9) | C6   | C20  | 1.251(7) |
| C10  | C11  | 1.488(4) | C12  | C13  | 1.384(7) |
| C14  | C15  | 1.503(4) | C16  | C17  | 1.514(3) |
| C17  | C18  | 1.514(4) | C17  | C19  | 1.513(4) |

Table 5. Bond lengths involving hydrogens (Å)

| atom | atom | distance | atom | atom | distance |
|------|------|----------|------|------|----------|
| C3   | H3   | 1.000    | C10  | H10A | 0.990    |
| C10  | H10B | 0.990    | C11  | H11A | 0.980    |
| C11  | H11B | 0.980    | C11  | H11C | 0.980    |
| C12  | H12A | 0.990    | C12  | H12B | 0.990    |
| C13  | H13A | 0.980    | C13  | H13B | 0.980    |
| C13  | H13C | 0.980    | C14  | H14A | 0.990    |
| C14  | H14B | 0.990    | C15  | H15A | 0.980    |
| C15  | H15B | 0.980    | C15  | H15C | 0.980    |
| C16  | H16A | 0.980    | C16  | H16B | 0.980    |
| C16  | H16C | 0.980    | C18  | H18A | 0.980    |
| C18  | H18B | 0.980    | C18  | H18C | 0.980    |
| C19  | H19A | 0.980    | C19  | H19B | 0.980    |
| C19  | H19C | 0.980    |      |      |          |

Table 6. Bond angles ( $^{\circ}$ )

| atom | atom | atom | angle      | atom | atom | atom | angle      |
|------|------|------|------------|------|------|------|------------|
| C4   | O2   | C10  | 116.23(15) | C1   | O3   | C5   | 116.40(16) |
| C7   | O5   | C14  | 116.96(17) | C8   | O7   | C12  | 117.22(17) |
| C9   | O9   | C17  | 122.05(17) | N2   | N1   | C3   | 112.21(12) |
| N2   | N1   | C4   | 118.55(15) | C3   | N1   | C4   | 123.53(17) |
| N1   | N2   | C1   | 106.10(16) | O3   | C1   | N2   | 125.95(19) |
| O3   | C1   | C2   | 118.48(14) | N2   | C1   | C2   | 115.52(17) |
| C1   | C2   | C3   | 99.56(14)  | C1   | C2   | C7   | 109.22(18) |
| C1   | C2   | C8   | 113.26(15) | C3   | C2   | C7   | 110.75(15) |
| C3   | C2   | C8   | 113.71(17) | C7   | C2   | C8   | 109.93(14) |
| N1   | C3   | C2   | 100.88(15) | N1   | C3   | C9   | 111.04(16) |
| C2   | C3   | C9   | 113.54(13) | O1   | C4   | O2   | 125.68(16) |
| O1   | C4   | N1   | 125.80(19) | O2   | C4   | N1   | 108.46(15) |
| O3   | C5   | C6   | 114.6(4)   | O3   | C5   | C20  | 111.8(4)   |
| C6   | C5   | C20  | 53.8(4)    | C5   | C6   | C20  | 67.3(5)    |
| O4   | C7   | O5   | 126.3(2)   | O4   | C7   | C2   | 124.30(19) |
| O5   | C7   | C2   | 109.43(16) | O6   | C8   | O7   | 126.04(16) |
| O6   | C8   | C2   | 123.47(17) | O7   | C8   | C2   | 110.43(16) |
| O8   | C9   | O9   | 127.8(2)   | O8   | C9   | C3   | 123.95(18) |
| O9   | C9   | C3   | 108.28(17) | O2   | C10  | C11  | 106.44(16) |
| O7   | C12  | C13  | 111.1(3)   | O5   | C14  | C15  | 106.5(2)   |
| O9   | C17  | C16  | 109.69(18) | O9   | C17  | C18  | 109.11(15) |
| O9   | C17  | C19  | 102.14(19) | C16  | C17  | C18  | 112.8(3)   |
| C16  | C17  | C19  | 111.25(15) | C18  | C17  | C19  | 111.3(2)   |
| C5   | C20  | C6   | 58.9(4)    |      |      |      |            |

Table 7. Bond angles involving hydrogens (°)

| atom | atom | atom | angle | atom | atom | atom | angle |
|------|------|------|-------|------|------|------|-------|
| N1   | C3   | H3   | 110.4 | C2   | C3   | H3   | 110.4 |
| C9   | C3   | H3   | 110.3 | O2   | C10  | H10A | 110.4 |
| O2   | C10  | H10B | 110.4 | C11  | C10  | H10A | 110.4 |
| C11  | C10  | H10B | 110.4 | H10A | C10  | H10B | 108.6 |
| C10  | C11  | H11A | 109.5 | C10  | C11  | H11B | 109.5 |
| C10  | C11  | H11C | 109.5 | H11A | C11  | H11B | 109.5 |
| H11A | C11  | H11C | 109.5 | H11B | C11  | H11C | 109.5 |
| O7   | C12  | H12A | 109.4 | O7   | C12  | H12B | 109.4 |
| C13  | C12  | H12A | 109.4 | C13  | C12  | H12B | 109.4 |
| H12A | C12  | H12B | 108.0 | C12  | C13  | H13A | 109.5 |
| C12  | C13  | H13B | 109.5 | C12  | C13  | H13C | 109.5 |
| H13A | C13  | H13B | 109.5 | H13A | C13  | H13C | 109.5 |
| H13B | C13  | H13C | 109.5 | O5   | C14  | H14A | 110.4 |
| O5   | C14  | H14B | 110.4 | C15  | C14  | H14A | 110.4 |
| C15  | C14  | H14B | 110.4 | H14A | C14  | H14B | 108.6 |
| C14  | C15  | H15A | 109.5 | C14  | C15  | H15B | 109.5 |
| C14  | C15  | H15C | 109.5 | H15A | C15  | H15B | 109.5 |
| H15A | C15  | H15C | 109.5 | H15B | C15  | H15C | 109.5 |
| C17  | C16  | H16A | 109.5 | C17  | C16  | H16B | 109.5 |
| C17  | C16  | H16C | 109.5 | H16A | C16  | H16B | 109.5 |
| H16A | C16  | H16C | 109.5 | H16B | C16  | H16C | 109.5 |
| C17  | C18  | H18A | 109.5 | C17  | C18  | H18B | 109.5 |
| C17  | C18  | H18C | 109.5 | H18A | C18  | H18B | 109.5 |
| H18A | C18  | H18C | 109.5 | H18B | C18  | H18C | 109.5 |
| C17  | C19  | H19A | 109.5 | C17  | C19  | H19B | 109.5 |
| C17  | C19  | H19C | 109.5 | H19A | C19  | H19B | 109.5 |
| H19A | C19  | H19C | 109.5 | H19B | C19  | H19C | 109.5 |



Table 8. Torsion Angles( $^{\circ}$ )  
 (Those having bond angles  $> 160$  or  $< 20$  degrees are excluded.)

| atom1 | atom2 | atom3 | atom4 | angle       | atom1 | atom2 | atom3 | atom4 | angle       |
|-------|-------|-------|-------|-------------|-------|-------|-------|-------|-------------|
| C4    | O2    | C10   | C11   | -170.47(15) | C10   | O2    | C4    | O1    | -7.0(3)     |
| C10   | O2    | C4    | N1    | 175.54(16)  | C1    | O3    | C5    | C6    | -90.8(3)    |
| C1    | O3    | C5    | C20   | -149.7(3)   | C5    | O3    | C1    | N2    | -1.4(4)     |
| C5    | O3    | C1    | C2    | 176.0(3)    | C7    | O5    | C14   | C15   | 165.22(13)  |
| C14   | O5    | C7    | O4    | -3.8(3)     | C14   | O5    | C7    | C2    | 177.08(12)  |
| C8    | O7    | C12   | C13   | -101.4(3)   | C12   | O7    | C8    | O6    | -1.1(3)     |
| C12   | O7    | C8    | C2    | -178.40(16) | C9    | O9    | C17   | C16   | -62.64(18)  |
| C9    | O9    | C17   | C18   | 61.4(2)     | C9    | O9    | C17   | C19   | 179.28(12)  |
| C17   | O9    | C9    | O8    | 0.4(3)      | C17   | O9    | C9    | C3    | 179.85(12)  |
| N2    | N1    | C3    | C2    | -23.2(2)    | N2    | N1    | C3    | C9    | 97.41(18)   |
| C3    | N1    | N2    | C1    | 13.9(3)     | N2    | N1    | C4    | O1    | 15.4(3)     |
| N2    | N1    | C4    | O2    | -167.17(15) | C4    | N1    | N2    | C1    | 168.28(16)  |
| C3    | N1    | C4    | O1    | 166.66(18)  | C3    | N1    | C4    | O2    | -15.9(3)    |
| C4    | N1    | C3    | C2    | -176.08(17) | C4    | N1    | C3    | C9    | -55.4(3)    |
| N1    | N2    | C1    | O3    | -179.9(2)   | N1    | N2    | C1    | C2    | 2.6(3)      |
| O3    | C1    | C2    | C3    | 166.00(19)  | O3    | C1    | C2    | C7    | -77.9(3)    |
| O3    | C1    | C2    | C8    | 44.9(3)     | N2    | C1    | C2    | C3    | -16.3(3)    |
| N2    | C1    | C2    | C7    | 99.7(2)     | N2    | C1    | C2    | C8    | -137.38(19) |
| C1    | C2    | C3    | N1    | 21.49(17)   | C1    | C2    | C3    | C9    | -97.36(16)  |
| C1    | C2    | C7    | O4    | -119.73(17) | C1    | C2    | C7    | O5    | 59.43(15)   |
| C1    | C2    | C8    | O6    | 32.6(3)     | C1    | C2    | C8    | O7    | -150.07(17) |
| C3    | C2    | C7    | O4    | -11.1(3)    | C3    | C2    | C7    | O5    | 168.10(12)  |
| C7    | C2    | C3    | N1    | -93.39(15)  | C7    | C2    | C3    | C9    | 147.76(13)  |
| C3    | C2    | C8    | O6    | -80.1(3)    | C3    | C2    | C8    | O7    | 97.22(19)   |
| C8    | C2    | C3    | N1    | 142.24(15)  | C8    | C2    | C3    | C9    | 23.4(2)     |
| C7    | C2    | C8    | O6    | 155.06(18)  | C7    | C2    | C8    | O7    | -27.6(2)    |
| C8    | C2    | C7    | O4    | 115.43(17)  | C8    | C2    | C7    | O5    | -65.41(18)  |
| N1    | C3    | C9    | O8    | -17.6(3)    | N1    | C3    | C9    | O9    | 162.92(12)  |
| C2    | C3    | C9    | O8    | 95.28(18)   | C2    | C3    | C9    | O9    | -84.24(17)  |
| O3    | C5    | C6    | C20   | -99.8(3)    | O3    | C5    | C20   | C6    | 105.3(4)    |
| C6    | C5    | C20   | C6    | 0.0(3)      | C20   | C5    | C6    | C20   | 0.0(4)      |
| C5    | C6    | C20   | C5    | -0.00(15)   |       |       |       |       |             |

Table 9. Intramolecular contacts less than 3.60 Å

| atom | atom | distance   | atom | atom | distance   |
|------|------|------------|------|------|------------|
| O1   | N2   | 2.7769(19) | O1   | C10  | 2.711(3)   |
| O2   | O8   | 3.026(2)   | O2   | N2   | 3.510(3)   |
| O2   | C3   | 2.6281(19) | O2   | C9   | 2.8535(18) |
| O3   | O5   | 2.874(3)   | O3   | O6   | 3.035(3)   |
| O3   | N1   | 3.448(2)   | O3   | C7   | 3.142(3)   |
| O3   | C8   | 2.939(3)   | O4   | O7   | 3.2762(19) |
| O4   | N1   | 3.436(3)   | O4   | C1   | 3.444(3)   |
| O4   | C3   | 2.813(3)   | O4   | C8   | 3.434(3)   |
| O4   | C14  | 2.718(3)   | O5   | O7   | 2.927(3)   |
| O5   | C1   | 2.822(3)   | O5   | C8   | 2.899(3)   |
| O6   | O8   | 3.373(2)   | O6   | O9   | 3.254(3)   |
| O6   | C1   | 2.896(3)   | O6   | C3   | 3.227(2)   |
| O6   | C9   | 3.016(3)   | O6   | C12  | 2.719(3)   |
| O6   | C13  | 3.468(6)   | O6   | C16  | 3.445(4)   |
| O7   | O9   | 3.283(2)   | O7   | C3   | 3.2890(19) |
| O7   | C7   | 2.608(3)   | O8   | N1   | 2.781(3)   |
| O8   | N2   | 3.348(3)   | O8   | C1   | 3.552(3)   |
| O8   | C2   | 3.350(3)   | O8   | C4   | 3.024(3)   |
| O8   | C8   | 3.556(3)   | O8   | C16  | 3.066(3)   |
| O8   | C17  | 2.873(3)   | O8   | C18  | 3.041(4)   |
| O9   | N1   | 3.595(2)   | O9   | C2   | 3.139(3)   |
| O9   | C8   | 2.962(3)   | N1   | C7   | 3.163(3)   |
| N1   | C10  | 3.551(3)   | N2   | C5   | 2.741(4)   |
| N2   | C6   | 3.321(5)   | N2   | C7   | 3.265(3)   |
| N2   | C8   | 3.582(3)   | N2   | C9   | 3.277(3)   |
| C1   | C4   | 3.416(3)   | C1   | C6   | 3.113(5)   |
| C1   | C9   | 3.254(4)   | C1   | C20  | 3.546(8)   |
| C4   | C9   | 3.033(3)   | C7   | C15  | 3.598(4)   |
| C8   | C9   | 2.831(3)   | C8   | C13  | 3.201(5)   |
| C9   | C16  | 3.026(3)   | C9   | C18  | 3.004(4)   |

Table 10. Intramolecular contacts less than 3.60 Å involving hydrogens

| atom | atom | distance | atom | atom | distance |
|------|------|----------|------|------|----------|
| O1   | H10A | 2.772    | O1   | H10B | 2.619    |
| O2   | H3   | 2.593    | O2   | H11A | 2.440    |
| O2   | H11B | 3.200    | O2   | H11C | 2.656    |
| O4   | H3   | 2.364    | O4   | H14A | 2.529    |
| O4   | H14B | 2.906    | O5   | H15A | 2.500    |
| O5   | H15B | 2.627    | O5   | H15C | 3.228    |
| O6   | H12A | 2.326    | O6   | H12B | 3.530    |
| O6   | H13B | 3.175    | O6   | H16A | 3.285    |
| O6   | H16B | 2.845    | O7   | H3   | 3.452    |
| O7   | H13A | 3.181    | O7   | H13B | 2.419    |
| O7   | H13C | 2.683    | O8   | H3   | 3.134    |
| O8   | H16A | 2.476    | O8   | H16B | 3.479    |
| O8   | H18A | 2.483    | O8   | H18C | 3.369    |
| O9   | H3   | 2.442    | O9   | H16A | 2.676    |
| O9   | H16B | 2.623    | O9   | H16C | 3.302    |
| O9   | H18A | 2.711    | O9   | H18B | 3.291    |
| O9   | H18C | 2.570    | O9   | H19A | 2.503    |
| O9   | H19B | 2.505    | O9   | H19C | 3.211    |
| N2   | H3   | 3.155    | C1   | H3   | 3.134    |
| C4   | H3   | 2.821    | C4   | H10A | 2.693    |
| C4   | H10B | 2.571    | C7   | H3   | 2.534    |
| C7   | H14A | 2.551    | C7   | H14B | 2.734    |
| C8   | H3   | 3.104    | C8   | H12A | 2.436    |
| C8   | H12B | 3.105    | C8   | H13B | 2.963    |
| C8   | H16B | 3.349    | C9   | H16A | 2.788    |
| C9   | H16B | 3.243    | C9   | H18A | 2.818    |
| C9   | H18C | 3.143    | C11  | H18C | 3.407    |
| C12  | H16B | 3.357    | C12  | H19A | 3.390    |
| C16  | H12A | 3.551    | C16  | H18A | 2.671    |
| C16  | H18B | 2.775    | C16  | H18C | 3.355    |
| C16  | H19A | 2.671    | C16  | H19B | 3.340    |
| C16  | H19C | 2.714    | C18  | H11C | 3.286    |
| C18  | H16A | 2.709    | C18  | H16B | 3.358    |
| C18  | H16C | 2.734    | C18  | H19A | 3.340    |
| C18  | H19B | 2.665    | C18  | H19C | 2.721    |
| C19  | H16A | 3.339    | C19  | H16B | 2.663    |
| C19  | H16C | 2.723    | C19  | H18A | 3.340    |

Table 10. Intramolecular contacts less than 3.60 Å involving hydrogens (continued)

| atom | atom | distance | atom | atom | distance |
|------|------|----------|------|------|----------|
| C19  | H18B | 2.682    | C19  | H18C | 2.703    |
| H10A | H11A | 2.432    | H10A | H11B | 2.277    |
| H10A | H11C | 2.836    | H10B | H11A | 2.836    |
| H10B | H11B | 2.433    | H10B | H11C | 2.277    |
| H11A | H18C | 3.364    | H11C | H18A | 3.073    |
| H11C | H18C | 2.621    | H12A | H13A | 2.141    |
| H12A | H13B | 2.356    | H12A | H13C | 2.742    |
| H12A | H16B | 2.603    | H12A | H19A | 3.245    |
| H12B | H13A | 2.345    | H12B | H13B | 2.745    |
| H12B | H13C | 2.150    | H12B | H16B | 3.512    |
| H12B | H19A | 2.887    | H14A | H15A | 2.854    |
| H14A | H15B | 2.320    | H14A | H15C | 2.412    |
| H14B | H15A | 2.411    | H14B | H15B | 2.854    |
| H14B | H15C | 2.321    | H16A | H18A | 2.490    |
| H16A | H18B | 3.075    | H16A | H18C | 3.569    |
| H16A | H19A | 3.551    | H16B | H18A | 3.565    |
| H16B | H19A | 2.462    | H16B | H19B | 3.550    |
| H16B | H19C | 2.969    | H16C | H18A | 2.956    |
| H16C | H18B | 2.629    | H16C | H19A | 2.996    |
| H16C | H19C | 2.573    | H18A | H19B | 3.567    |
| H18A | H19C | 3.598    | H18B | H19A | 3.587    |
| H18B | H19B | 2.925    | H18B | H19C | 2.537    |
| H18C | H19A | 3.575    | H18C | H19B | 2.500    |
| H18C | H19C | 3.040    |      |      |          |

Table 11. Intermolecular contacts less than 3.60 Å

| atom | atom             | distance | atom | atom             | distance |
|------|------------------|----------|------|------------------|----------|
| O1   | C12 <sup>1</sup> | 3.326(3) | O1   | C14 <sup>2</sup> | 3.168(3) |
| O1   | C15 <sup>2</sup> | 3.592(4) | O3   | C5 <sup>3</sup>  | 3.360(5) |
| O3   | C15 <sup>4</sup> | 3.543(3) | O4   | C11 <sup>5</sup> | 3.315(3) |
| O4   | C19 <sup>6</sup> | 3.539(3) | O6   | C5 <sup>3</sup>  | 3.143(4) |
| O6   | C6 <sup>3</sup>  | 3.470(5) | O6   | C20 <sup>3</sup> | 3.312(8) |
| O7   | C11 <sup>5</sup> | 3.368(3) | O8   | C20 <sup>3</sup> | 3.060(7) |
| C5   | O3 <sup>3</sup>  | 3.360(5) | C5   | O6 <sup>3</sup>  | 3.143(4) |
| C5   | C5 <sup>3</sup>  | 3.493(7) | C6   | O6 <sup>3</sup>  | 3.470(5) |
| C6   | C6 <sup>7</sup>  | 3.376(7) | C11  | O4 <sup>5</sup>  | 3.315(3) |
| C11  | O7 <sup>5</sup>  | 3.368(3) | C12  | O1 <sup>8</sup>  | 3.326(3) |
| C14  | O1 <sup>9</sup>  | 3.168(3) | C15  | O1 <sup>9</sup>  | 3.592(4) |
| C15  | O3 <sup>4</sup>  | 3.543(3) | C15  | C20 <sup>4</sup> | 3.491(7) |
| C19  | O4 <sup>10</sup> | 3.539(3) | C20  | O6 <sup>3</sup>  | 3.312(8) |
| C20  | O8 <sup>3</sup>  | 3.060(7) | C20  | C15 <sup>4</sup> | 3.491(7) |

Symmetry Operators:

- |                    |                  |
|--------------------|------------------|
| (1) X+1,Y+1,Z      | (2) X+1,Y,Z      |
| (3) -X+2,-Y+1,-Z   | (4) -X+1,-Y+1,-Z |
| (5) -X+2,-Y+1,-Z+1 | (6) X,Y+1,Z      |
| (7) -X+2,-Y+2,-Z   | (8) X-1,Y-1,Z    |
| (9) X-1,Y,Z        | (10) X,Y-1,Z     |

Table 12. Intermolecular contacts less than 3.60 Å involving hydrogens

| atom | atom               | distance | atom | atom               | distance |
|------|--------------------|----------|------|--------------------|----------|
| O1   | H10A <sup>1</sup>  | 2.887    | O1   | H12A <sup>2</sup>  | 3.562    |
| O1   | H12B <sup>2</sup>  | 2.383    | O1   | H14A <sup>3</sup>  | 2.592    |
| O1   | H14B <sup>3</sup>  | 3.064    | O1   | H15C <sup>3</sup>  | 3.102    |
| O1   | H19A <sup>2</sup>  | 2.951    | O2   | H19B <sup>4</sup>  | 2.775    |
| O3   | H15A <sup>5</sup>  | 2.871    | O3   | H15C <sup>5</sup>  | 3.336    |
| O4   | H10B <sup>6</sup>  | 3.188    | O4   | H11A <sup>4</sup>  | 3.057    |
| O4   | H11B <sup>4</sup>  | 3.425    | O4   | H11C <sup>4</sup>  | 2.931    |
| O4   | H16C <sup>7</sup>  | 3.243    | O4   | H18C <sup>4</sup>  | 2.801    |
| O4   | H19C <sup>7</sup>  | 2.657    | O5   | H15A <sup>5</sup>  | 3.597    |
| O5   | H16C <sup>7</sup>  | 3.310    | O6   | H13A <sup>8</sup>  | 3.128    |
| O7   | H11A <sup>4</sup>  | 2.915    | O7   | H11B <sup>4</sup>  | 2.930    |
| O8   | H14B <sup>3</sup>  | 2.643    | O9   | H11A <sup>4</sup>  | 2.907    |
| N1   | H16C <sup>7</sup>  | 3.344    | N2   | H13A <sup>2</sup>  | 3.495    |
| N2   | H15C <sup>3</sup>  | 2.921    | N2   | H16C <sup>7</sup>  | 3.010    |
| C1   | H16C <sup>7</sup>  | 3.195    | C3   | H11A <sup>4</sup>  | 3.409    |
| C4   | H10A <sup>1</sup>  | 3.472    | C4   | H12B <sup>2</sup>  | 3.465    |
| C4   | H14A <sup>3</sup>  | 3.275    | C4   | H14B <sup>3</sup>  | 3.168    |
| C4   | H15C <sup>3</sup>  | 3.543    | C4   | H19B <sup>4</sup>  | 3.378    |
| C5   | H13A <sup>2</sup>  | 3.300    | C5   | H15A <sup>5</sup>  | 3.360    |
| C6   | H13A <sup>2</sup>  | 3.185    | C6   | H13C <sup>2</sup>  | 3.416    |
| C6   | H13C <sup>5</sup>  | 3.563    | C6   | H16A <sup>7</sup>  | 3.440    |
| C6   | H16C <sup>7</sup>  | 3.491    | C7   | H11A <sup>4</sup>  | 3.469    |
| C7   | H16C <sup>7</sup>  | 3.118    | C7   | H19C <sup>7</sup>  | 3.441    |
| C10  | H10A <sup>1</sup>  | 3.188    | C10  | H19A <sup>4</sup>  | 3.537    |
| C10  | H19B <sup>4</sup>  | 3.279    | C11  | H3 <sup>4</sup>    | 3.578    |
| C11  | H11C <sup>9</sup>  | 3.400    | C11  | H12B <sup>4</sup>  | 3.464    |
| C11  | H18A <sup>9</sup>  | 3.269    | C11  | H19A <sup>4</sup>  | 3.581    |
| C12  | H11B <sup>4</sup>  | 3.340    | C12  | H15B <sup>10</sup> | 3.316    |
| C12  | H15C <sup>10</sup> | 3.345    | C13  | H15C <sup>10</sup> | 3.470    |
| C14  | H10B <sup>6</sup>  | 3.570    | C14  | H16B <sup>7</sup>  | 3.515    |
| C14  | H19A <sup>7</sup>  | 3.589    | C15  | H12A <sup>7</sup>  | 3.105    |
| C15  | H13A <sup>7</sup>  | 3.433    | C15  | H13B <sup>5</sup>  | 3.496    |
| C16  | H14A <sup>10</sup> | 3.457    | C18  | H10B <sup>9</sup>  | 3.533    |
| C18  | H11B <sup>9</sup>  | 3.217    | C18  | H19C <sup>11</sup> | 3.321    |
| C19  | H10A <sup>4</sup>  | 3.442    | C19  | H11A <sup>4</sup>  | 3.377    |
| C19  | H14A <sup>10</sup> | 3.166    | C19  | H18B <sup>11</sup> | 3.271    |
| C20  | H13B <sup>5</sup>  | 3.356    | C20  | H13C <sup>5</sup>  | 3.158    |

Table 12. Intermolecular contacts less than 3.60 Å involving hydrogens (continued)

| atom | atom               | distance | atom | atom               | distance |
|------|--------------------|----------|------|--------------------|----------|
| C20  | H14B <sup>5</sup>  | 3.365    | C20  | H15A <sup>5</sup>  | 2.877    |
| C20  | H15C <sup>5</sup>  | 3.409    | C20  | H16A <sup>12</sup> | 3.227    |
| H3   | C11 <sup>4</sup>   | 3.578    | H3   | H11A <sup>4</sup>  | 2.767    |
| H3   | H11C <sup>4</sup>  | 3.567    | H3   | H18C <sup>4</sup>  | 3.170    |
| H3   | H19B <sup>4</sup>  | 3.199    | H10A | O1 <sup>1</sup>    | 2.887    |
| H10A | C4 <sup>1</sup>    | 3.472    | H10A | C10 <sup>1</sup>   | 3.188    |
| H10A | C19 <sup>4</sup>   | 3.442    | H10A | H10A <sup>1</sup>  | 2.332    |
| H10A | H10B <sup>1</sup>  | 3.435    | H10A | H12B <sup>4</sup>  | 3.583    |
| H10A | H18B <sup>9</sup>  | 3.506    | H10A | H19A <sup>4</sup>  | 2.991    |
| H10A | H19B <sup>4</sup>  | 3.011    | H10B | O4 <sup>3</sup>    | 3.188    |
| H10B | C14 <sup>3</sup>   | 3.570    | H10B | C18 <sup>9</sup>   | 3.533    |
| H10B | H10A <sup>1</sup>  | 3.435    | H10B | H11C <sup>9</sup>  | 3.268    |
| H10B | H14A <sup>3</sup>  | 3.015    | H10B | H14B <sup>3</sup>  | 3.218    |
| H10B | H18A <sup>9</sup>  | 3.427    | H10B | H18B <sup>9</sup>  | 3.260    |
| H10B | H18C <sup>9</sup>  | 3.327    | H10B | H19A <sup>2</sup>  | 3.333    |
| H10B | H19C <sup>2</sup>  | 3.171    | H11A | O4 <sup>4</sup>    | 3.057    |
| H11A | O7 <sup>4</sup>    | 2.915    | H11A | O9 <sup>4</sup>    | 2.907    |
| H11A | C3 <sup>4</sup>    | 3.409    | H11A | C7 <sup>4</sup>    | 3.469    |
| H11A | C19 <sup>4</sup>   | 3.377    | H11A | H3 <sup>4</sup>    | 2.767    |
| H11A | H12B <sup>4</sup>  | 3.297    | H11A | H19A <sup>4</sup>  | 3.009    |
| H11A | H19B <sup>4</sup>  | 2.998    | H11B | O4 <sup>4</sup>    | 3.425    |
| H11B | O7 <sup>4</sup>    | 2.930    | H11B | C12 <sup>4</sup>   | 3.340    |
| H11B | C18 <sup>9</sup>   | 3.217    | H11B | H11C <sup>9</sup>  | 3.398    |
| H11B | H12B <sup>4</sup>  | 2.830    | H11B | H18A <sup>9</sup>  | 2.479    |
| H11B | H18B <sup>9</sup>  | 3.257    | H11B | H18C <sup>9</sup>  | 3.486    |
| H11C | O4 <sup>4</sup>    | 2.931    | H11C | C11 <sup>9</sup>   | 3.400    |
| H11C | H3 <sup>4</sup>    | 3.567    | H11C | H10B <sup>9</sup>  | 3.268    |
| H11C | H11B <sup>9</sup>  | 3.398    | H11C | H11C <sup>9</sup>  | 2.708    |
| H11C | H18A <sup>9</sup>  | 3.421    | H12A | O1 <sup>13</sup>   | 3.562    |
| H12A | C15 <sup>10</sup>  | 3.105    | H12A | H13B <sup>8</sup>  | 3.547    |
| H12A | H14A <sup>10</sup> | 3.298    | H12A | H15B <sup>10</sup> | 2.504    |
| H12A | H15C <sup>10</sup> | 2.934    | H12B | O1 <sup>13</sup>   | 2.383    |
| H12B | C4 <sup>13</sup>   | 3.465    | H12B | C11 <sup>4</sup>   | 3.464    |
| H12B | H10A <sup>4</sup>  | 3.583    | H12B | H11A <sup>4</sup>  | 3.297    |
| H12B | H11B <sup>4</sup>  | 2.830    | H12B | H14A <sup>10</sup> | 3.307    |
| H12B | H15B <sup>10</sup> | 3.420    | H12B | H15C <sup>10</sup> | 3.149    |
| H13A | O6 <sup>8</sup>    | 3.128    | H13A | N2 <sup>13</sup>   | 3.495    |

Table 12. Intermolecular contacts less than 3.60 Å involving hydrogens (continued)

| atom | atom               | distance | atom | atom               | distance |
|------|--------------------|----------|------|--------------------|----------|
| H13A | C5 <sup>13</sup>   | 3.300    | H13A | C6 <sup>13</sup>   | 3.185    |
| H13A | C15 <sup>10</sup>  | 3.433    | H13A | H15B <sup>10</sup> | 3.218    |
| H13A | H15C <sup>10</sup> | 2.761    | H13B | C15 <sup>5</sup>   | 3.496    |
| H13B | C20 <sup>5</sup>   | 3.356    | H13B | H12A <sup>8</sup>  | 3.547    |
| H13B | H15A <sup>5</sup>  | 3.486    | H13B | H15B <sup>5</sup>  | 2.756    |
| H13C | C6 <sup>13</sup>   | 3.416    | H13C | C6 <sup>5</sup>    | 3.563    |
| H13C | C20 <sup>5</sup>   | 3.158    | H13C | H16A <sup>6</sup>  | 2.841    |
| H13C | H18A <sup>6</sup>  | 3.585    | H14A | O1 <sup>6</sup>    | 2.592    |
| H14A | C4 <sup>6</sup>    | 3.275    | H14A | C16 <sup>7</sup>   | 3.457    |
| H14A | C19 <sup>7</sup>   | 3.166    | H14A | H10B <sup>6</sup>  | 3.015    |
| H14A | H12A <sup>7</sup>  | 3.298    | H14A | H12B <sup>7</sup>  | 3.307    |
| H14A | H16B <sup>7</sup>  | 2.934    | H14A | H16C <sup>7</sup>  | 3.239    |
| H14A | H19A <sup>7</sup>  | 2.608    | H14A | H19C <sup>7</sup>  | 2.896    |
| H14B | O1 <sup>6</sup>    | 3.064    | H14B | O8 <sup>6</sup>    | 2.643    |
| H14B | C4 <sup>6</sup>    | 3.168    | H14B | C20 <sup>5</sup>   | 3.365    |
| H14B | H10B <sup>6</sup>  | 3.218    | H15A | O3 <sup>5</sup>    | 2.871    |
| H15A | O5 <sup>5</sup>    | 3.597    | H15A | C5 <sup>5</sup>    | 3.360    |
| H15A | C20 <sup>5</sup>   | 2.877    | H15A | H13B <sup>5</sup>  | 3.486    |
| H15A | H15A <sup>5</sup>  | 2.945    | H15B | C12 <sup>7</sup>   | 3.316    |
| H15B | H12A <sup>7</sup>  | 2.504    | H15B | H12B <sup>7</sup>  | 3.420    |
| H15B | H13A <sup>7</sup>  | 3.218    | H15B | H13B <sup>5</sup>  | 2.756    |
| H15B | H16B <sup>7</sup>  | 2.944    | H15C | O1 <sup>6</sup>    | 3.102    |
| H15C | O3 <sup>5</sup>    | 3.336    | H15C | N2 <sup>6</sup>    | 2.921    |
| H15C | C4 <sup>6</sup>    | 3.543    | H15C | C12 <sup>7</sup>   | 3.345    |
| H15C | C13 <sup>7</sup>   | 3.470    | H15C | C20 <sup>5</sup>   | 3.409    |
| H15C | H12A <sup>7</sup>  | 2.934    | H15C | H12B <sup>7</sup>  | 3.149    |
| H15C | H13A <sup>7</sup>  | 2.761    | H16A | C6 <sup>10</sup>   | 3.440    |
| H16A | C20 <sup>12</sup>  | 3.227    | H16A | H13C <sup>3</sup>  | 2.841    |
| H16B | C14 <sup>10</sup>  | 3.515    | H16B | H14A <sup>10</sup> | 2.934    |
| H16B | H15B <sup>10</sup> | 2.944    | H16C | O4 <sup>10</sup>   | 3.243    |
| H16C | O5 <sup>10</sup>   | 3.310    | H16C | N1 <sup>10</sup>   | 3.344    |
| H16C | N2 <sup>10</sup>   | 3.010    | H16C | C1 <sup>10</sup>   | 3.195    |
| H16C | C6 <sup>10</sup>   | 3.491    | H16C | C7 <sup>10</sup>   | 3.118    |
| H16C | H14A <sup>10</sup> | 3.239    | H18A | C11 <sup>9</sup>   | 3.269    |
| H18A | H10B <sup>9</sup>  | 3.427    | H18A | H11B <sup>9</sup>  | 2.479    |
| H18A | H11C <sup>9</sup>  | 3.421    | H18A | H13C <sup>3</sup>  | 3.585    |
| H18B | C19 <sup>11</sup>  | 3.271    | H18B | H10A <sup>9</sup>  | 3.506    |



Table 12. Intermolecular contacts less than 3.60 Å involving hydrogens (continued)

| atom | atom               | distance | atom | atom               | distance |
|------|--------------------|----------|------|--------------------|----------|
| H18B | H10B <sup>9</sup>  | 3.260    | H18B | H11B <sup>9</sup>  | 3.257    |
| H18B | H19B <sup>11</sup> | 2.943    | H18B | H19C <sup>11</sup> | 2.707    |
| H18C | O4 <sup>4</sup>    | 2.801    | H18C | H3 <sup>4</sup>    | 3.170    |
| H18C | H10B <sup>9</sup>  | 3.327    | H18C | H11B <sup>9</sup>  | 3.486    |
| H18C | H19C <sup>11</sup> | 3.048    | H19A | O1 <sup>13</sup>   | 2.951    |
| H19A | C10 <sup>4</sup>   | 3.537    | H19A | C11 <sup>4</sup>   | 3.581    |
| H19A | C14 <sup>10</sup>  | 3.589    | H19A | H10A <sup>4</sup>  | 2.991    |
| H19A | H10B <sup>13</sup> | 3.333    | H19A | H11A <sup>4</sup>  | 3.009    |
| H19A | H14A <sup>10</sup> | 2.608    | H19B | O2 <sup>4</sup>    | 2.775    |
| H19B | C4 <sup>4</sup>    | 3.378    | H19B | C10 <sup>4</sup>   | 3.279    |
| H19B | H3 <sup>4</sup>    | 3.199    | H19B | H10A <sup>4</sup>  | 3.011    |
| H19B | H11A <sup>4</sup>  | 2.998    | H19B | H18B <sup>11</sup> | 2.943    |
| H19C | O4 <sup>10</sup>   | 2.657    | H19C | C7 <sup>10</sup>   | 3.441    |
| H19C | C18 <sup>11</sup>  | 3.321    | H19C | H10B <sup>13</sup> | 3.171    |
| H19C | H14A <sup>10</sup> | 2.896    | H19C | H18B <sup>11</sup> | 2.707    |
| H19C | H18C <sup>11</sup> | 3.048    | H19C | H19C <sup>11</sup> | 3.579    |

Symmetry Operators:

- |                    |                    |
|--------------------|--------------------|
| (1) -X+3,-Y+2,-Z+1 | (2) X+1,Y+1,Z      |
| (3) X+1,Y,Z        | (4) -X+2,-Y+1,-Z+1 |
| (5) -X+1,-Y+1,-Z   | (6) X-1,Y,Z        |
| (7) X,Y+1,Z        | (8) -X+1,-Y,-Z     |
| (9) -X+3,-Y+1,-Z+1 | (10) X,Y-1,Z       |
| (11) -X+2,-Y,-Z+1  | (12) -X+2,-Y+1,-Z  |
| (13) X-1,Y-1,Z     |                    |

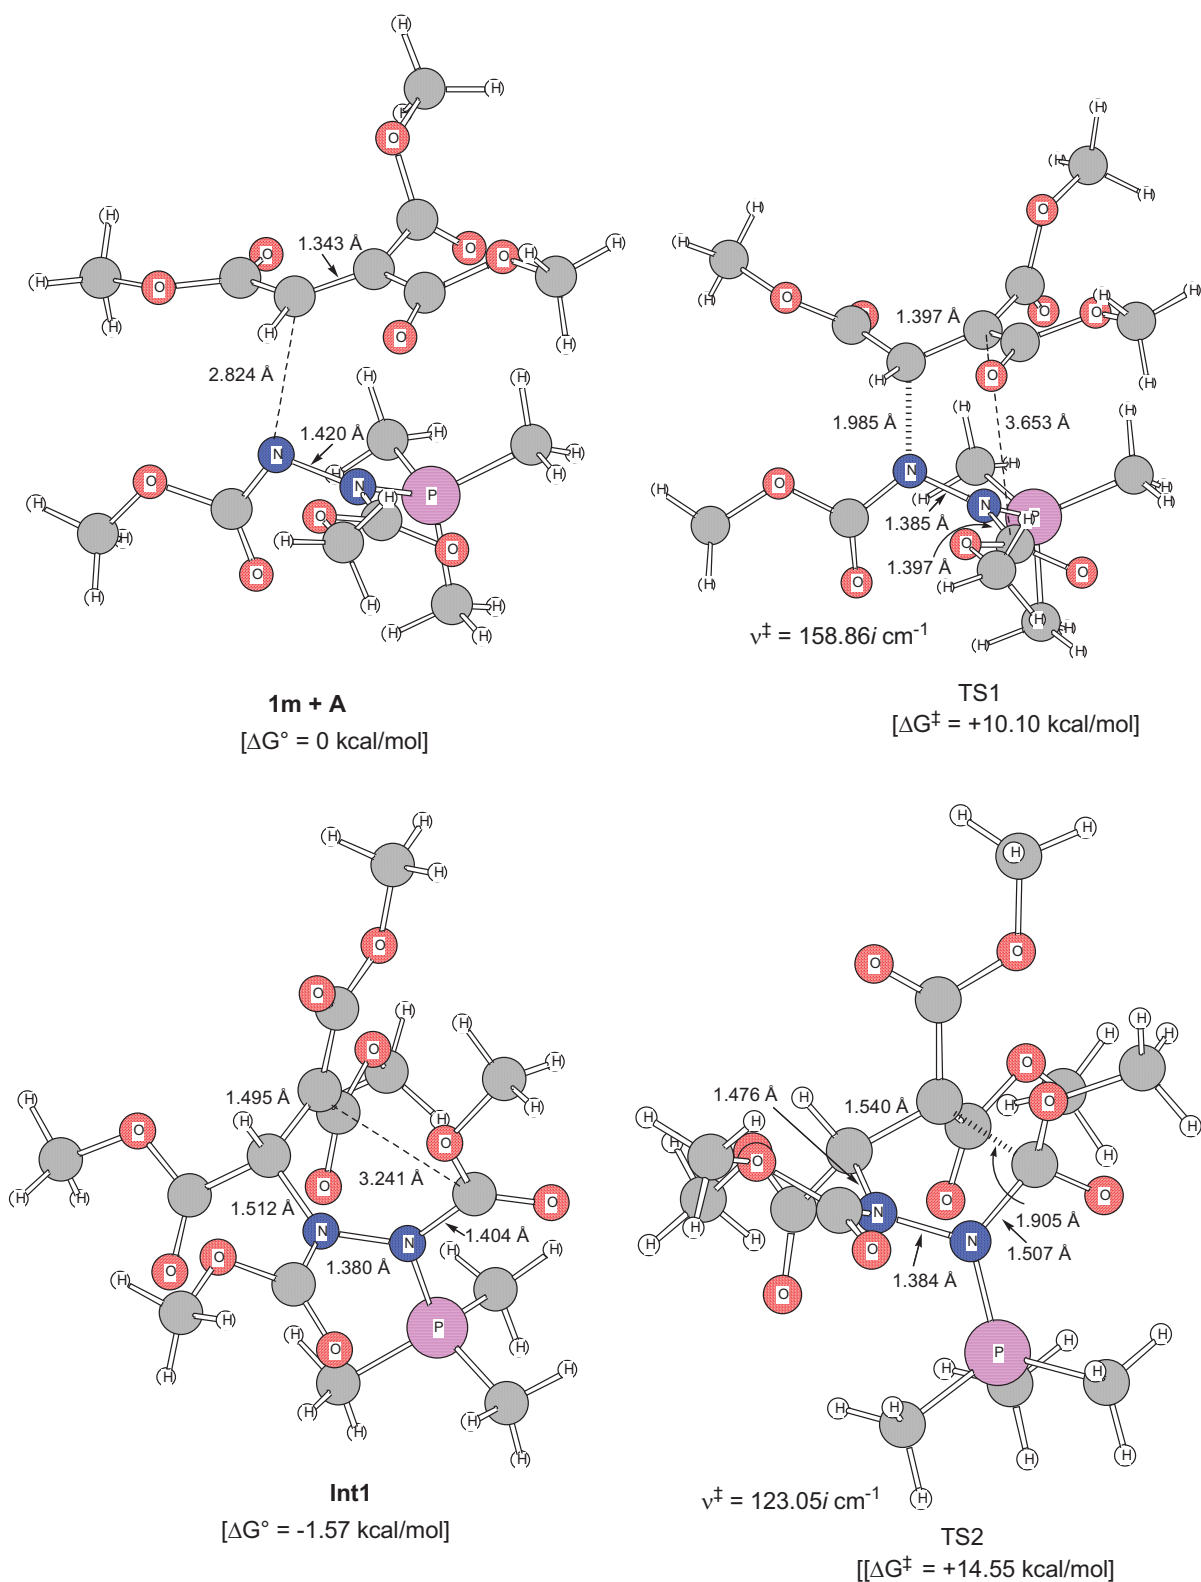

Figure S2. continued.

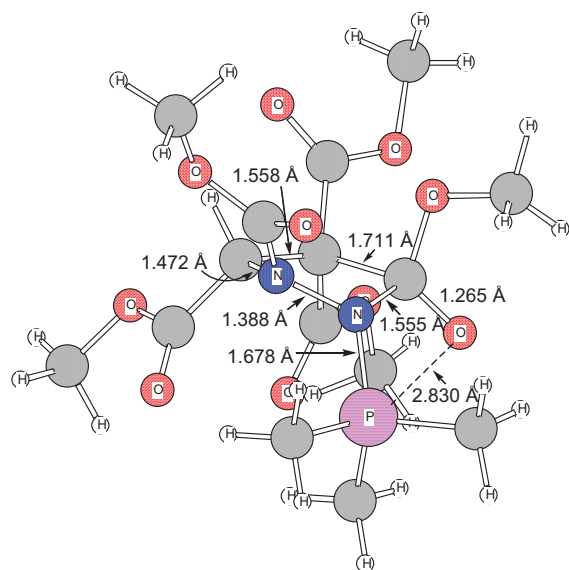

**Int2**  
[ $\Delta G^\circ = +13.28$  kcal/mol]

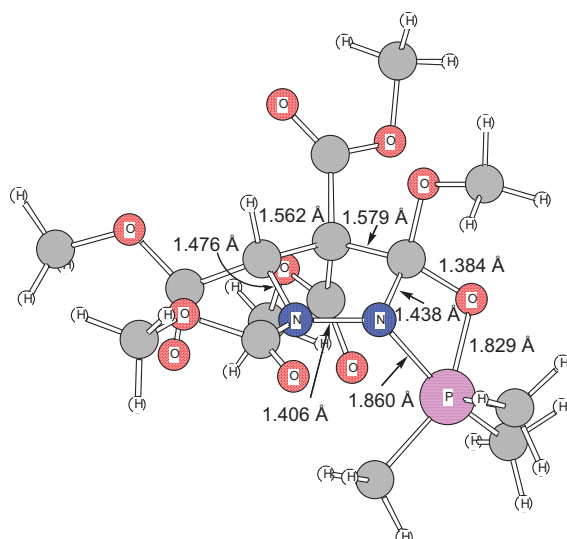

**Int3**  
[ $\Delta G^\circ = +18.82$  kcal/mol]

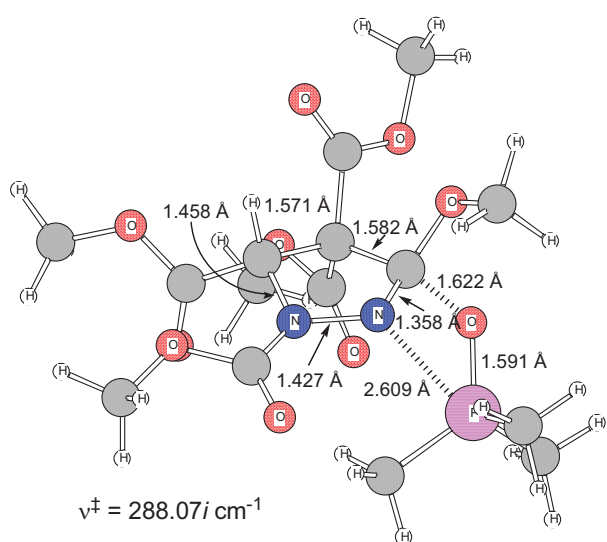

**TS3**  
[ $\Delta G^\ddagger = +28.26$  kcal/mol]

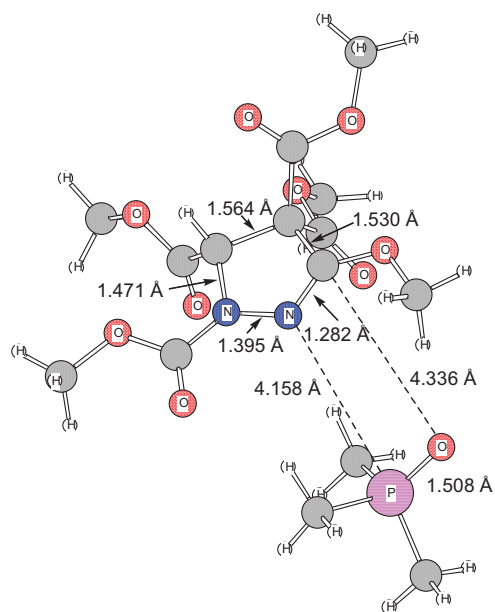

**3m + Me<sub>3</sub>PO**  
[ $\Delta G^\circ = -20.71$  kcal/mol]

Figure S2. continued.

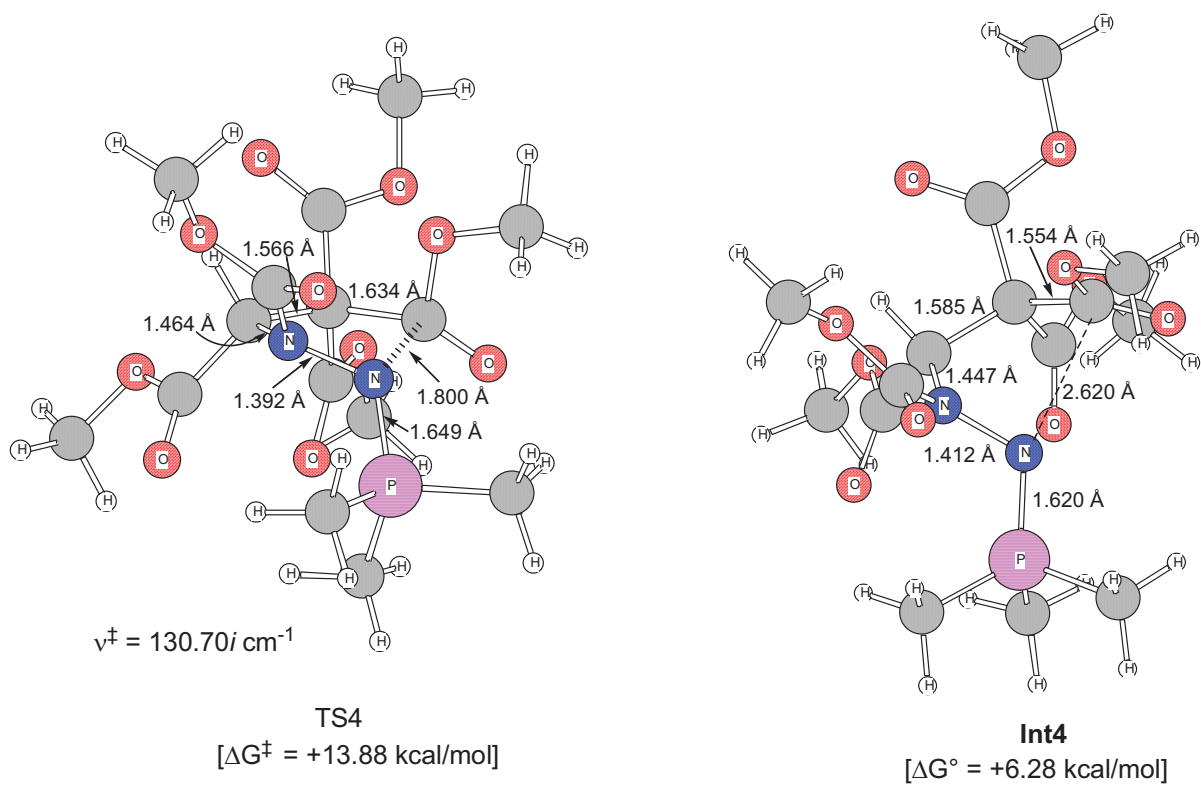

Figure S2. B3LYP/6-31G\*-optimized structures in Scheme 2.<sup>S1,S2</sup>

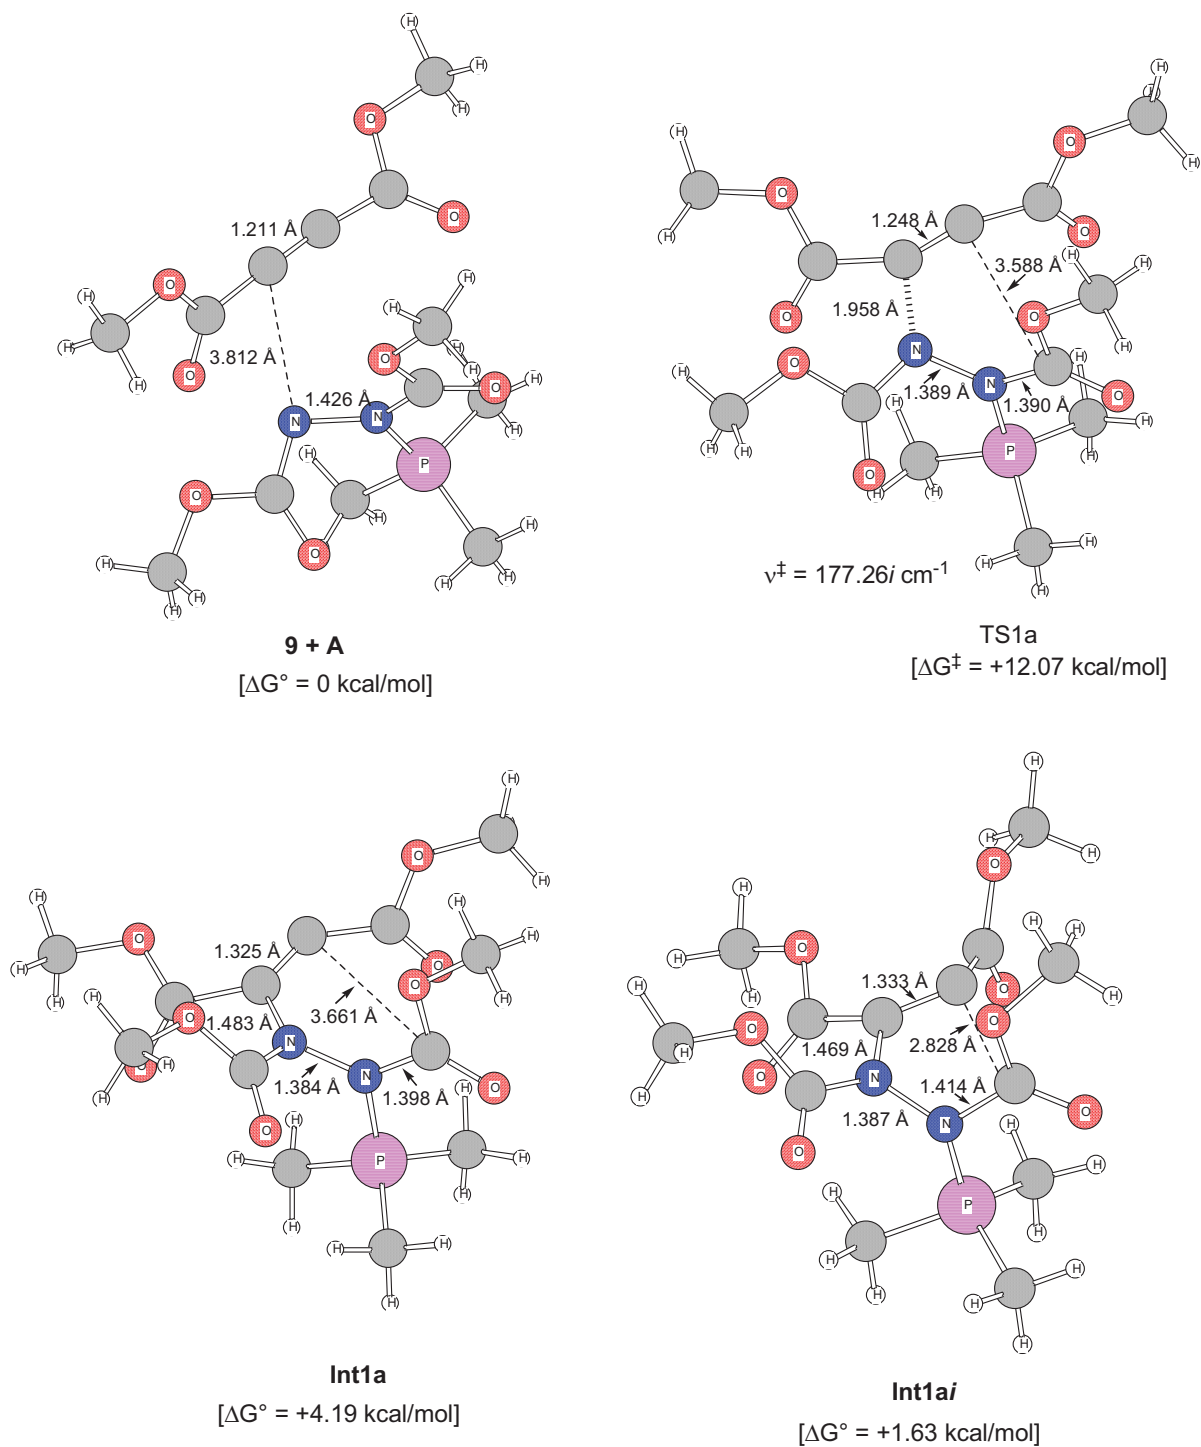

Figure S3. continued.

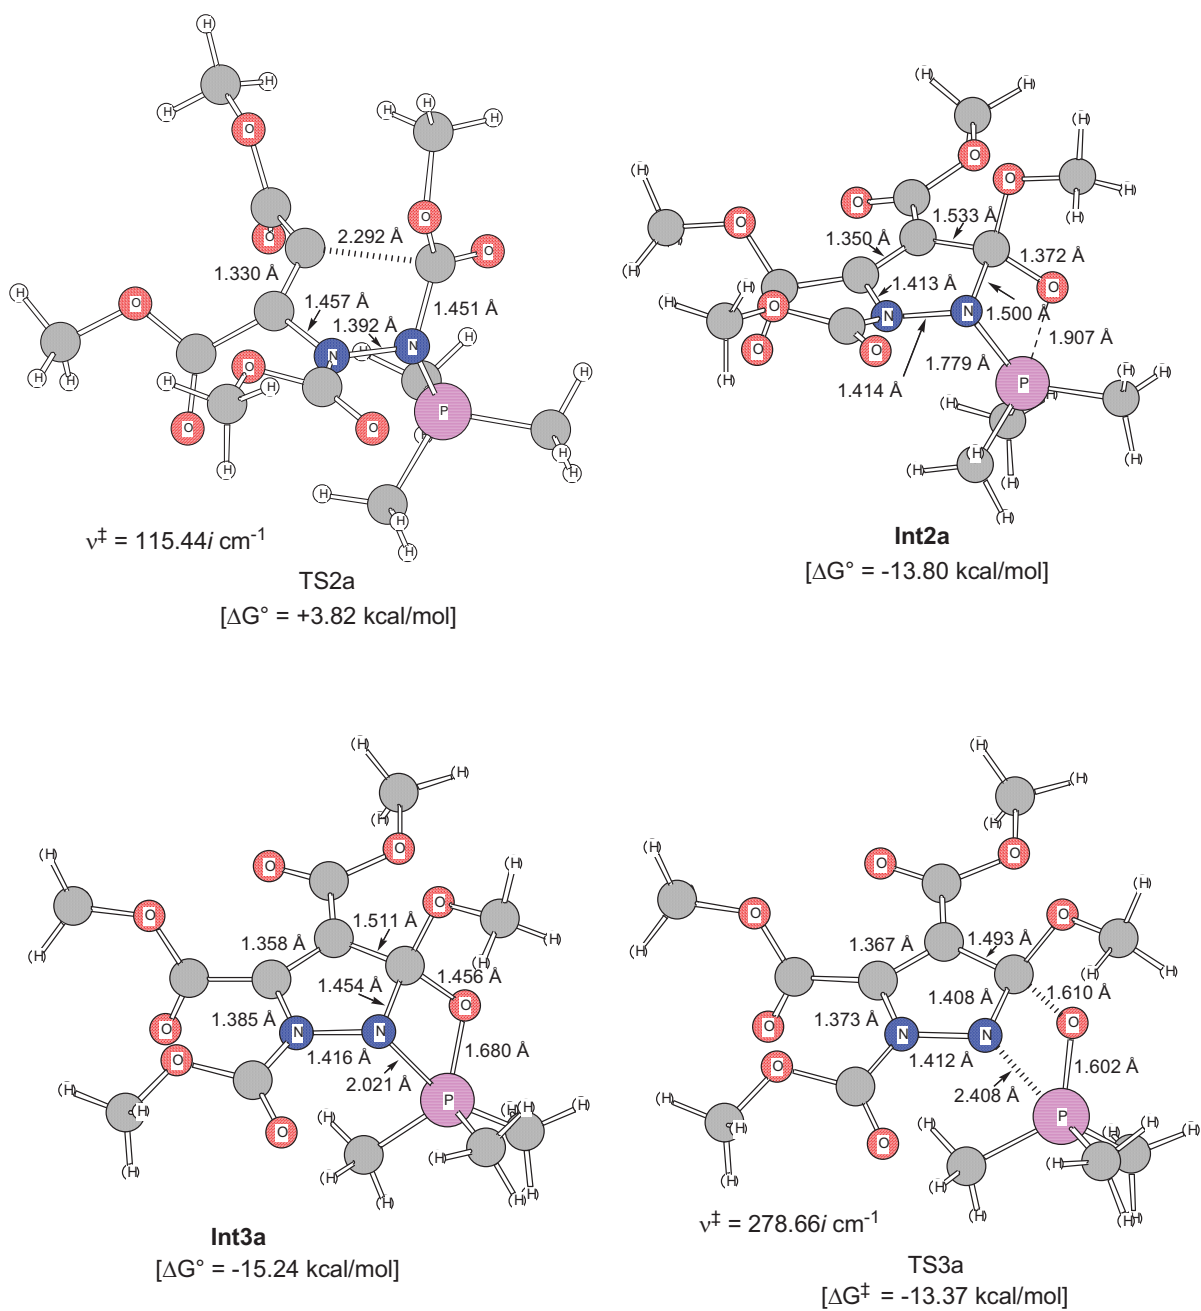

Figure S3. continued.

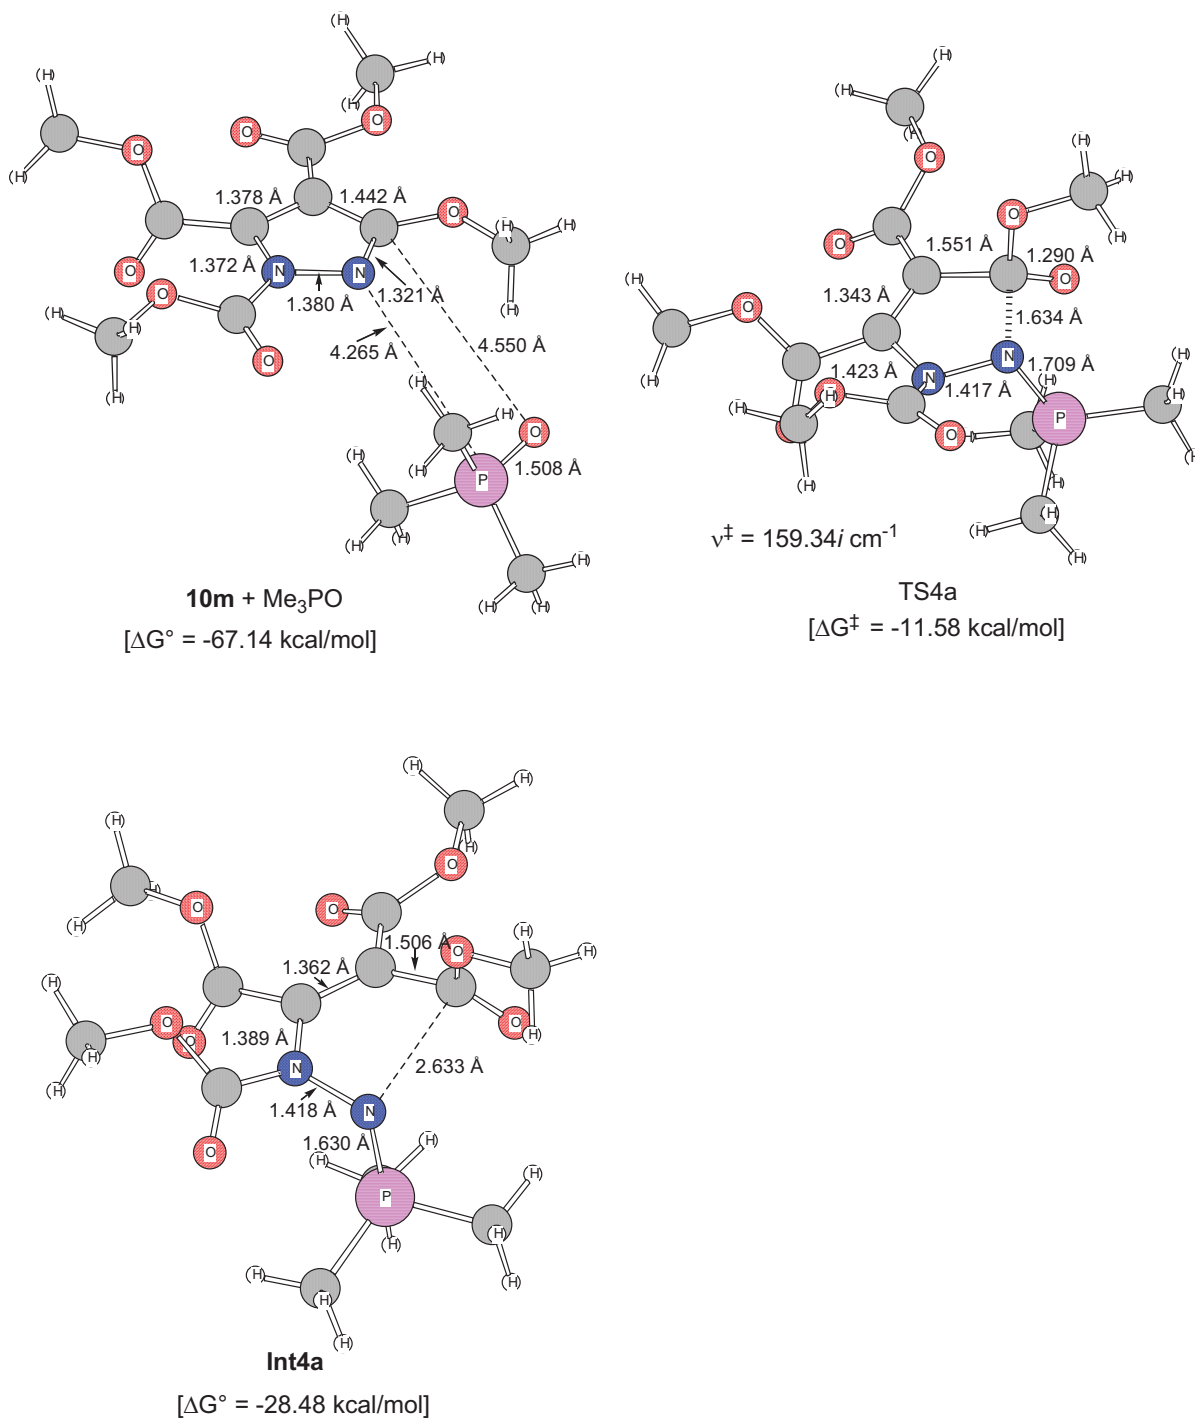

Figure S3. B3LYP/6-31G\*-optimized structures in Scheme 4.<sup>S1,S2</sup>

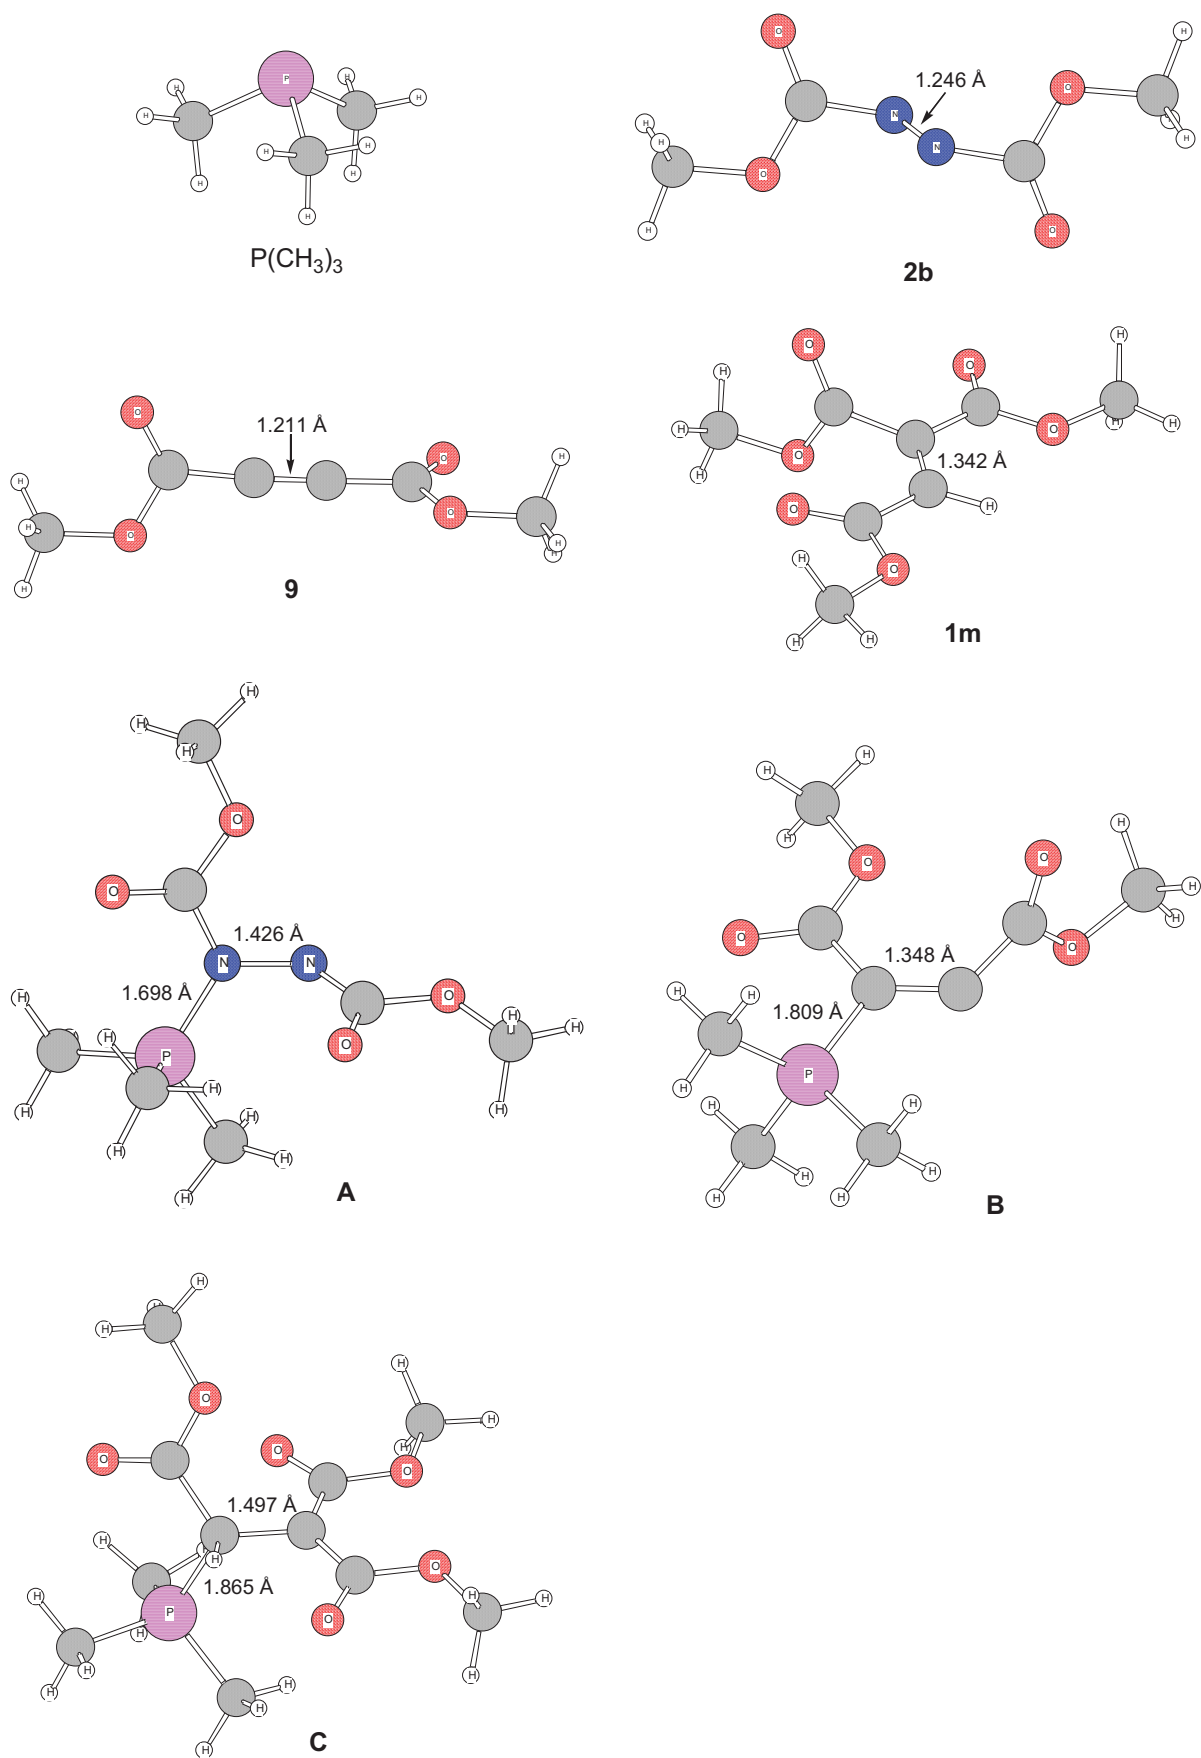

Figure S4. B3LYP/6-31G\*-optimized structures in Scheme 5. <sup>S1,S2</sup>



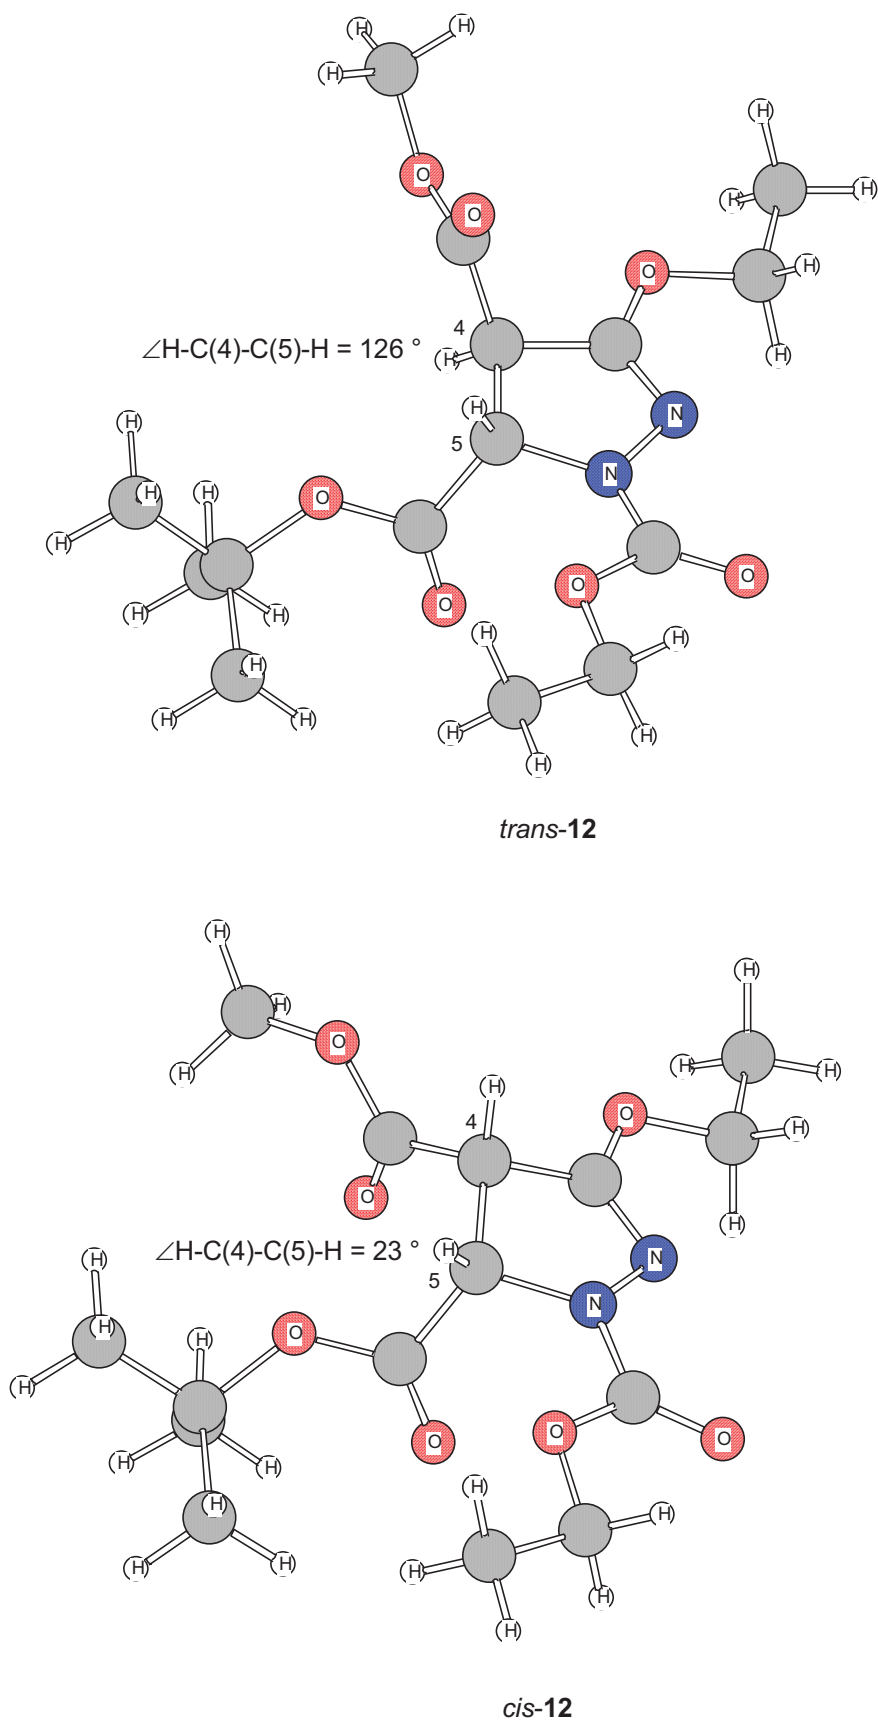

Figure S5. B3LYP/6-31G\*-optimized structures of *trans-12* and *cis-12*. The atom-numbering is different from that of Cartesian coordinates of the optimized geometries.

## References

- <sup>S1</sup> (a) A. D. Becke, *J. Chem. Phys.*, 1993, **98**, 5648. (b) C. Lee, W. Yang and R. G. Parr, *Phys. Rev. B*, 1998, **37**, 785.
- <sup>S1</sup> Gaussian 03, Revision C.02, M. J. Frisch, G. W. Trucks, H. B. Schlegel, G. E. Scuseria, M. A. Robb, J. R. Cheeseman, J. A. Montgomery, Jr., T. Vreven, K. N. Kudin, J. C. Burant, J. M. Millam, S. S. Iyengar, J. Tomasi, V. Barone, B. Mennucci, M. Cossi, G. Scalmani, N. Rega, G. A. Petersson, H. Nakatsuji, M. Hada, M. Ehara, K. Toyota, R. Fukuda, J. Hasegawa, M. Ishida, T. Nakajima, Y. Honda, O. Kitao, H. Nakai, M. Klene, X. Li, J. E. Knox, H. P. Hratchian, J. B. Cross, V. Bakken, C. Adamo, J. Jaramillo, R. Gomperts, R. E. Stratmann, O. Yazyev, A. J. Austin, R. Cammi, C. Pomelli, J. W. Ochterski, P. Y. Ayala, K. Morokuma, G. A. Voth, P. Salvador, J. J. Dannenberg, V. G. Zakrzewski, S. Dapprich, A. D. Daniels, M. C. Strain, O. Farkas, D. K. Malick, A. D. Rabuck, K. Raghavachari, J. B. Foresman, J. V. Ortiz, Q. Cui, A. G. Baboul, S. Clifford, J. Cioslowski, B. B. Stefanov, G. Liu, A. Liashenko, P. Piskorz, I. Komaromi, R. L. Martin, D. J. Fox, T. Keith, M. A. Al-Laham, C. Y. Peng, A. Nanayakkara, M. Challacombe, P. M. W. Gill, B. Johnson, W. Chen, M. W. Wong, C. Gonzalez, and J. A. Pople, Gaussian, Inc., Wallingford CT, 2004.

## Cartesian coordinates of the optimized geometries of Figures S2-5

1m + A (DEADTS1nnRRR.rev.log)

Standard orientation:

| Center<br>Number | Atomic<br>Number | Atomic<br>Type | Coordinates (Angstroms) |           |           |
|------------------|------------------|----------------|-------------------------|-----------|-----------|
|                  |                  |                | X                       | Y         | Z         |
| 1                | 15               | 0              | 1.180134                | -1.392135 | 1.756199  |
| 2                | 8                | 0              | 0.685780                | -3.226730 | -0.320059 |
| 3                | 8                | 0              | 1.077764                | -1.792639 | -2.042641 |
| 4                | 8                | 0              | 3.683334                | -0.199658 | 0.477209  |
| 5                | 8                | 0              | 3.238663                | 1.662647  | -0.754133 |
| 6                | 7                | 0              | 1.200989                | -1.040854 | 0.090674  |
| 7                | 7                | 0              | 1.555788                | 0.243885  | -0.398261 |
| 8                | 6                | 0              | 0.716834                | -2.839710 | -2.960636 |
| 9                | 6                | 0              | 0.970593                | -2.112819 | -0.754885 |
| 10               | 6                | 0              | 4.607152                | 2.010949  | -0.561940 |
| 11               | 6                | 0              | 2.865601                | 0.470126  | -0.179042 |
| 12               | 1                | 0              | 1.286651                | -3.748369 | -2.752945 |
| 13               | 1                | 0              | 0.963152                | -2.446499 | -3.947102 |
| 14               | 1                | 0              | -0.353737               | -3.041557 | -2.888558 |
| 15               | 6                | 0              | 2.522975                | -2.516882 | 2.248841  |
| 16               | 1                | 0              | 4.848696                | 2.126000  | 0.500216  |
| 17               | 1                | 0              | 5.274470                | 1.254008  | -0.985739 |
| 18               | 1                | 0              | 4.744094                | 2.962191  | -1.082020 |
| 19               | 6                | 0              | 1.362557                | 0.201254  | 2.595417  |
| 20               | 6                | 0              | -0.402924               | -2.109986 | 2.295796  |
| 21               | 1                | 0              | 3.455868                | -2.070703 | 1.898069  |
| 22               | 1                | 0              | 2.362670                | -3.483878 | 1.766752  |
| 23               | 1                | 0              | 2.529873                | -2.639831 | 3.337123  |
| 24               | 1                | 0              | -0.580544               | -3.037773 | 1.751638  |
| 25               | 1                | 0              | -1.203170               | -1.387538 | 2.104619  |
| 26               | 1                | 0              | -0.347433               | -2.312025 | 3.371523  |
| 27               | 1                | 0              | 0.643714                | 0.912199  | 2.178839  |
| 28               | 1                | 0              | 2.379303                | 0.566580  | 2.444792  |
| 29               | 1                | 0              | 1.165921                | 0.054996  | 3.662338  |
| 30               | 6                | 0              | -1.011883               | 1.116869  | -1.184973 |
| 31               | 6                | 0              | -2.027621               | 0.509752  | -0.549334 |
| 32               | 6                | 0              | -2.576239               | 1.001138  | 0.763361  |
| 33               | 6                | 0              | -2.592916               | -0.741431 | -1.128797 |
| 34               | 6                | 0              | -0.363380               | 2.348048  | -0.661112 |
| 35               | 8                | 0              | -2.354398               | 0.473925  | 1.836372  |
| 36               | 8                | 0              | -2.184628               | -1.297164 | -2.129522 |
| 37               | 8                | 0              | -3.368795               | 2.067519  | 0.600871  |
| 38               | 8                | 0              | -3.640999               | -1.188222 | -0.403293 |
| 39               | 6                | 0              | -4.253820               | -2.395324 | -0.883909 |
| 40               | 6                | 0              | -3.849237               | 2.669791  | 1.815694  |
| 41               | 8                | 0              | -0.462836               | 2.757035  | 0.483248  |
| 42               | 8                | 0              | 0.302067                | 2.980400  | -1.635998 |
| 43               | 6                | 0              | 1.047366                | 4.137736  | -1.227230 |
| 44               | 1                | 0              | -0.627118               | 0.702703  | -2.108539 |
| 45               | 1                | 0              | -3.527693               | -3.212361 | -0.897373 |
| 46               | 1                | 0              | -4.645615               | -2.249395 | -1.893998 |
| 47               | 1                | 0              | -5.062108               | -2.609496 | -0.184477 |
| 48               | 1                | 0              | -3.005328               | 3.053881  | 2.394264  |
| 49               | 1                | 0              | -4.403017               | 1.942031  | 2.413857  |
| 50               | 1                | 0              | -4.500046               | 3.484394  | 1.497554  |
| 51               | 1                | 0              | 1.461274                | 4.554496  | -2.145823 |
| 52               | 1                | 0              | 1.848020                | 3.830675  | -0.552011 |
| 53               | 1                | 0              | 0.394693                | 4.862108  | -0.732826 |

TS1 (DEADTS1nn.log)

Standard orientation:

| Center<br>Number | Atomic<br>Number | Atomic<br>Type | Coordinates (Angstroms) |           |           |
|------------------|------------------|----------------|-------------------------|-----------|-----------|
|                  |                  |                | X                       | Y         | Z         |
| 1                | 15               | 0              | 1.176564                | -1.543736 | 1.768464  |
| 2                | 8                | 0              | 0.549956                | -3.320458 | -0.363719 |
| 3                | 8                | 0              | 0.891584                | -1.804840 | -2.033277 |

|    |   |   |           |           |           |
|----|---|---|-----------|-----------|-----------|
| 4  | 8 | 0 | 3.498433  | -0.168404 | -0.010871 |
| 5  | 8 | 0 | 2.667757  | 1.688169  | -1.036215 |
| 6  | 7 | 0 | 0.986424  | -1.131902 | 0.120021  |
| 7  | 7 | 0 | 1.218615  | 0.159914  | -0.322605 |
| 8  | 6 | 0 | 0.483645  | -2.758113 | -3.033877 |
| 9  | 6 | 0 | 0.784096  | -2.189128 | -0.770601 |
| 10 | 6 | 0 | 4.008731  | 2.176092  | -1.123913 |
| 11 | 6 | 0 | 2.534455  | 0.478871  | -0.427359 |
| 12 | 1 | 0 | 0.782667  | -3.767543 | -2.746675 |
| 13 | 1 | 0 | 0.985703  | -2.446408 | -3.949800 |
| 14 | 1 | 0 | -0.598507 | -2.685407 | -3.155960 |
| 15 | 6 | 0 | 2.597383  | -2.663363 | 1.965657  |
| 16 | 1 | 0 | 4.441138  | 2.321085  | -0.129018 |
| 17 | 1 | 0 | 4.641228  | 1.482712  | -1.684913 |
| 18 | 1 | 0 | 3.936653  | 3.130897  | -1.647492 |
| 19 | 6 | 0 | 1.513397  | 0.003896  | 2.634352  |
| 20 | 6 | 0 | -0.304133 | -2.327832 | 2.467711  |
| 21 | 1 | 0 | 3.454479  | -2.183696 | 1.485798  |
| 22 | 1 | 0 | 2.378557  | -3.613751 | 1.474794  |
| 23 | 1 | 0 | 2.796810  | -2.829615 | 3.029453  |
| 24 | 1 | 0 | -0.552276 | -3.211392 | 1.878112  |
| 25 | 1 | 0 | -1.115080 | -1.595660 | 2.437402  |
| 26 | 1 | 0 | -0.096569 | -2.613788 | 3.504859  |
| 27 | 1 | 0 | 0.752354  | 0.742493  | 2.365292  |
| 28 | 1 | 0 | 2.506133  | 0.359095  | 2.350822  |
| 29 | 1 | 0 | 1.479299  | -0.195677 | 3.710489  |
| 30 | 6 | 0 | -0.410839 | 1.188046  | -0.799539 |
| 31 | 6 | 0 | -1.590515 | 0.560432  | -0.391587 |
| 32 | 6 | 0 | -2.168928 | 0.748448  | 0.959881  |
| 33 | 6 | 0 | -2.241527 | -0.331868 | -1.342606 |
| 34 | 6 | 0 | -0.013901 | 2.493987  | -0.171552 |
| 35 | 8 | 0 | -1.619391 | 0.494277  | 2.026040  |
| 36 | 8 | 0 | -1.871049 | -0.562798 | -2.488356 |
| 37 | 8 | 0 | -3.418917 | 1.260087  | 0.921743  |
| 38 | 8 | 0 | -3.335297 | -0.956941 | -0.807093 |
| 39 | 6 | 0 | -4.033656 | -1.830973 | -1.694607 |
| 40 | 6 | 0 | -4.077827 | 1.386932  | 2.187591  |
| 41 | 8 | 0 | 0.191551  | 2.709375  | 1.005776  |
| 42 | 8 | 0 | 0.035987  | 3.454985  | -1.118621 |
| 43 | 6 | 0 | 0.367848  | 4.765632  | -0.641228 |
| 44 | 1 | 0 | -0.219521 | 1.130209  | -1.863742 |
| 45 | 1 | 0 | -3.414383 | -2.691601 | -1.968911 |
| 46 | 1 | 0 | -4.330035 | -1.309008 | -2.608847 |
| 47 | 1 | 0 | -4.915557 | -2.165390 | -1.144803 |
| 48 | 1 | 0 | -3.521581 | 2.056897  | 2.849003  |
| 49 | 1 | 0 | -4.176190 | 0.411481  | 2.673758  |
| 50 | 1 | 0 | -5.062579 | 1.799920  | 1.964158  |
| 51 | 1 | 0 | 0.358388  | 5.408898  | -1.521859 |
| 52 | 1 | 0 | 1.357817  | 4.763002  | -0.176622 |
| 53 | 1 | 0 | -0.366968 | 5.108224  | 0.092620  |

Int1 (DEADTS10b.for.log)  
 Standard orientation:

| Center Number | Atomic Number | Atomic Type | Coordinates (Angstroms) |           |           |
|---------------|---------------|-------------|-------------------------|-----------|-----------|
|               |               |             | X                       | Y         | Z         |
| 1             | 15            | 0           | 1.846969                | -1.269102 | 1.485456  |
| 2             | 8             | 0           | 0.674944                | -3.156908 | -0.311337 |
| 3             | 8             | 0           | 0.295712                | -1.656521 | -1.987979 |
| 4             | 8             | 0           | 3.227774                | 0.191406  | -1.091297 |
| 5             | 8             | 0           | 1.919351                | 1.869719  | -1.887919 |
| 6             | 7             | 0           | 1.062663                | -0.929815 | 0.001425  |
| 7             | 7             | 0           | 1.006460                | 0.350701  | -0.509088 |
| 8             | 6             | 0           | -0.338409               | -2.639152 | -2.831101 |
| 9             | 6             | 0           | 0.653447                | -2.027063 | -0.773521 |
| 10            | 6             | 0           | 3.077897                | 2.444883  | -2.509804 |
| 11            | 6             | 0           | 2.146847                | 0.760643  | -1.170059 |
| 12            | 1             | 0           | 0.420400                | -3.113439 | -3.459224 |
| 13            | 1             | 0           | -1.050428               | -2.070596 | -3.427696 |
| 14            | 1             | 0           | -0.841740               | -3.391301 | -2.221918 |
| 15            | 6             | 0           | 3.311943                | -2.291826 | 1.144167  |
| 16            | 1             | 0           | 3.808399                | 2.743008  | -1.753259 |
| 17            | 1             | 0           | 3.538192                | 1.732704  | -3.198722 |
| 18            | 1             | 0           | 2.709079                | 3.317581  | -3.048829 |

|    |   |   |           |           |           |
|----|---|---|-----------|-----------|-----------|
| 19 | 6 | 0 | 2.373812  | 0.306478  | 2.183473  |
| 20 | 6 | 0 | 0.772874  | -2.126703 | 2.666776  |
| 21 | 1 | 0 | 3.913109  | -1.772015 | 0.393845  |
| 22 | 1 | 0 | 2.996532  | -3.263694 | 0.760243  |
| 23 | 1 | 0 | 3.887979  | -2.426026 | 2.065587  |
| 24 | 1 | 0 | 0.369929  | -3.026581 | 2.199342  |
| 25 | 1 | 0 | -0.029224 | -1.429369 | 2.927558  |
| 26 | 1 | 0 | 1.363365  | -2.393372 | 3.550284  |
| 27 | 1 | 0 | 1.505540  | 0.963321  | 2.267099  |
| 28 | 1 | 0 | 3.123378  | 0.766041  | 1.537235  |
| 29 | 1 | 0 | 2.801766  | 0.103227  | 3.171073  |
| 30 | 6 | 0 | -0.302034 | 1.108707  | -0.512682 |
| 31 | 6 | 0 | -1.504946 | 0.304748  | -0.135977 |
| 32 | 6 | 0 | -1.711299 | 0.106055  | 1.254166  |
| 33 | 6 | 0 | -2.360700 | -0.055123 | -1.239519 |
| 34 | 6 | 0 | -0.089867 | 2.380766  | 0.322111  |
| 35 | 8 | 0 | -0.863793 | 0.410361  | 2.129424  |
| 36 | 8 | 0 | -2.110841 | 0.176884  | -2.428256 |
| 37 | 8 | 0 | -2.898576 | -0.448840 | 1.636363  |
| 38 | 8 | 0 | -3.507378 | -0.720616 | -0.897085 |
| 39 | 6 | 0 | -4.365074 | -1.041228 | -1.988038 |
| 40 | 6 | 0 | -3.106552 | -0.573984 | 3.038524  |
| 41 | 8 | 0 | 0.952724  | 2.738533  | 0.834641  |
| 42 | 8 | 0 | -1.211084 | 3.120002  | 0.341158  |
| 43 | 6 | 0 | -1.125334 | 4.346589  | 1.078516  |
| 44 | 1 | 0 | -0.454855 | 1.422377  | -1.549063 |
| 45 | 1 | 0 | -3.891198 | -1.744886 | -2.682013 |
| 46 | 1 | 0 | -4.648353 | -0.146536 | -2.551075 |
| 47 | 1 | 0 | -5.248497 | -1.501337 | -1.539156 |
| 48 | 1 | 0 | -2.929435 | 0.372233  | 3.558158  |
| 49 | 1 | 0 | -2.456596 | -1.339076 | 3.481337  |
| 50 | 1 | 0 | -4.149388 | -0.879155 | 3.151078  |
| 51 | 1 | 0 | -2.104447 | 4.816297  | 0.978025  |
| 52 | 1 | 0 | -0.344319 | 4.993071  | 0.668251  |
| 53 | 1 | 0 | -0.903891 | 4.142957  | 2.129763  |

TS2 (DEADTS10b.log)

Standard orientation:

| Center Number | Atomic Number | Atomic Type | Coordinates (Angstroms) |           |           |
|---------------|---------------|-------------|-------------------------|-----------|-----------|
|               |               |             | X                       | Y         | Z         |
| 1             | 15            | 0           | 1.916523                | -1.254829 | -1.470477 |
| 2             | 8             | 0           | -0.672267               | -0.611026 | -2.261131 |
| 3             | 8             | 0           | -0.484390               | 1.631518  | -1.733669 |
| 4             | 8             | 0           | 2.929335                | 2.010648  | -0.286224 |
| 5             | 8             | 0           | 1.950084                | 2.185404  | 1.759463  |
| 6             | 7             | 0           | 1.072809                | 0.095398  | -0.920764 |
| 7             | 7             | 0           | 1.255555                | 0.564884  | 0.368370  |
| 8             | 6             | 0           | -1.189869               | 1.894765  | -2.943611 |
| 9             | 6             | 0           | -0.334944               | 0.267301  | -1.430188 |
| 10            | 6             | 0           | 2.819486                | 3.290104  | 2.045041  |
| 11            | 6             | 0           | 2.102899                | 1.648485  | 0.529584  |
| 12            | 1             | 0           | -0.645837               | 1.517615  | -3.816973 |
| 13            | 1             | 0           | -1.265656               | 2.983608  | -3.001759 |
| 14            | 1             | 0           | -2.188359               | 1.449409  | -2.930612 |
| 15            | 6             | 0           | 2.222668                | -0.989627 | -3.240949 |
| 16            | 1             | 0           | 3.866768                | 2.984704  | 1.973297  |
| 17            | 1             | 0           | 2.636613                | 4.112160  | 1.348662  |
| 18            | 1             | 0           | 2.575578                | 3.591417  | 3.064121  |
| 19            | 6             | 0           | 3.501427                | -1.212560 | -0.588629 |
| 20            | 6             | 0           | 1.217660                | -2.919668 | -1.241917 |
| 21            | 1             | 0           | 2.745506                | -0.038010 | -3.367651 |
| 22            | 1             | 0           | 1.255983                | -0.947921 | -3.746310 |
| 23            | 1             | 0           | 2.830203                | -1.806030 | -3.644585 |
| 24            | 1             | 0           | 0.255121                | -2.967889 | -1.750269 |
| 25            | 1             | 0           | 1.065459                | -3.094035 | -0.175433 |
| 26            | 1             | 0           | 1.918932                | -3.654225 | -1.654887 |
| 27            | 1             | 0           | 3.304073                | -1.408876 | 0.468666  |
| 28            | 1             | 0           | 3.953341                | -0.224309 | -0.701897 |
| 29            | 1             | 0           | 4.162424                | -1.984755 | -0.994640 |
| 30            | 6             | 0           | 0.090727                | 0.261577  | 1.222439  |
| 31            | 6             | 0           | -1.135120               | 0.168771  | 0.295774  |
| 32            | 6             | 0           | -1.774023               | -1.174147 | 0.229839  |
| 33            | 6             | 0           | -1.995146               | 1.395138  | 0.468486  |

|    |   |   |           |           |           |
|----|---|---|-----------|-----------|-----------|
| 34 | 6 | 0 | 0.407707  | -0.960287 | 2.085405  |
| 35 | 8 | 0 | -1.176680 | -2.213769 | 0.480874  |
| 36 | 8 | 0 | -1.748036 | 2.296664  | 1.251518  |
| 37 | 8 | 0 | -3.041871 | -1.173800 | -0.208496 |
| 38 | 8 | 0 | -3.051950 | 1.445117  | -0.365436 |
| 39 | 6 | 0 | -3.853520 | 2.627890  | -0.253805 |
| 40 | 6 | 0 | -3.611958 | -2.467427 | -0.441333 |
| 41 | 8 | 0 | 1.403000  | -1.652962 | 1.995136  |
| 42 | 8 | 0 | -0.522024 | -1.103516 | 3.042362  |
| 43 | 6 | 0 | -0.391290 | -2.275001 | 3.862029  |
| 44 | 1 | 0 | -0.064451 | 1.105952  | 1.894833  |
| 45 | 1 | 0 | -3.262610 | 3.518370  | -0.485735 |
| 46 | 1 | 0 | -4.259582 | 2.728066  | 0.756590  |
| 47 | 1 | 0 | -4.658945 | 2.501550  | -0.978725 |
| 48 | 1 | 0 | -3.614161 | -3.064800 | 0.474672  |
| 49 | 1 | 0 | -3.048938 | -2.997331 | -1.213985 |
| 50 | 1 | 0 | -4.632167 | -2.276645 | -0.776750 |
| 51 | 1 | 0 | -1.198022 | -2.212059 | 4.592957  |
| 52 | 1 | 0 | 0.580742  | -2.291012 | 4.361373  |
| 53 | 1 | 0 | -0.500236 | -3.170603 | 3.244784  |

Int2 (DEADTS10b.rev.log)  
 Standard orientation:

| Center Number | Atomic Number | Atomic Type | Coordinates (Angstroms) |           |           |
|---------------|---------------|-------------|-------------------------|-----------|-----------|
|               |               |             | X                       | Y         | Z         |
| 1             | 15            | 0           | 1.939571                | -1.481625 | -1.196570 |
| 2             | 8             | 0           | -0.490187               | -0.550082 | -2.308681 |
| 3             | 8             | 0           | -0.169030               | 1.671254  | -1.668523 |
| 4             | 8             | 0           | 3.074388                | 1.757842  | 0.044959  |
| 5             | 8             | 0           | 1.847919                | 2.086940  | 1.932378  |
| 6             | 7             | 0           | 1.186769                | -0.043328 | -0.771140 |
| 7             | 7             | 0           | 1.255847                | 0.426977  | 0.533297  |
| 8             | 6             | 0           | 0.406438                | 1.997231  | -2.924008 |
| 9             | 6             | 0           | -0.205228               | 0.270758  | -1.388774 |
| 10            | 6             | 0           | 2.734593                | 3.158539  | 2.283525  |
| 11            | 6             | 0           | 2.130327                | 1.479563  | 0.759461  |
| 12            | 1             | 0           | 1.490904                | 1.815894  | -2.921331 |
| 13            | 1             | 0           | 0.228689                | 3.065402  | -3.074646 |
| 14            | 1             | 0           | -0.061260               | 1.422180  | -3.729276 |
| 15            | 6             | 0           | 2.476639                | -1.299072 | -2.921238 |
| 16            | 1             | 0           | 3.762698                | 2.796104  | 2.365780  |
| 17            | 1             | 0           | 2.692775                | 3.952401  | 1.533662  |
| 18            | 1             | 0           | 2.377028                | 3.523851  | 3.246615  |
| 19            | 6             | 0           | 3.398697                | -1.597918 | -0.122437 |
| 20            | 6             | 0           | 1.040811                | -3.058996 | -1.054337 |
| 21            | 1             | 0           | 3.137547                | -0.431882 | -2.998582 |
| 22            | 1             | 0           | 1.580361                | -1.133977 | -3.523001 |
| 23            | 1             | 0           | 3.002397                | -2.200009 | -3.253548 |
| 24            | 1             | 0           | 0.149751                | -3.004100 | -1.679618 |
| 25            | 1             | 0           | 0.738101                | -3.202691 | -0.016004 |
| 26            | 1             | 0           | 1.699201                | -3.872996 | -1.379176 |
| 27            | 1             | 0           | 3.049680                | -1.749178 | 0.902853  |
| 28            | 1             | 0           | 3.966721                | -0.666299 | -0.182090 |
| 29            | 1             | 0           | 4.020207                | -2.443274 | -0.433920 |
| 30            | 6             | 0           | -0.051538               | 0.281615  | 1.192934  |
| 31            | 6             | 0           | -1.118932               | 0.263862  | 0.057536  |
| 32            | 6             | 0           | -1.897152               | -1.036316 | -0.023707 |
| 33            | 6             | 0           | -1.953873               | 1.547376  | 0.147768  |
| 34            | 6             | 0           | -0.008807               | -0.926026 | 2.130985  |
| 35            | 8             | 0           | -1.443784               | -2.107254 | 0.345059  |
| 36            | 8             | 0           | -1.795462               | 2.395180  | 1.006527  |
| 37            | 8             | 0           | -3.100677               | -0.924103 | -0.588649 |
| 38            | 8             | 0           | -2.861581               | 1.663282  | -0.828652 |
| 39            | 6             | 0           | -3.583668               | 2.900618  | -0.843754 |
| 40            | 6             | 0           | -3.786431               | -2.160824 | -0.831737 |
| 41            | 8             | 0           | 0.906822                | -1.718731 | 2.223908  |
| 42            | 8             | 0           | -1.092039               | -0.929745 | 2.925084  |
| 43            | 6             | 0           | -1.218232               | -2.066301 | 3.793940  |
| 44            | 1             | 0           | -0.239944               | 1.163209  | 1.806084  |
| 45            | 1             | 0           | -2.897767               | 3.739159  | -0.993233 |
| 46            | 1             | 0           | -4.125968               | 3.047089  | 0.094440  |
| 47            | 1             | 0           | -4.278114               | 2.819975  | -1.680883 |
| 48            | 1             | 0           | -3.941564               | -2.709083 | 0.101324  |

|    |   |   |           |           |           |
|----|---|---|-----------|-----------|-----------|
| 49 | 1 | 0 | -3.209892 | -2.779812 | -1.523571 |
| 50 | 1 | 0 | -4.740760 | -1.877659 | -1.276368 |
| 51 | 1 | 0 | -2.117612 | -1.885573 | 4.383348  |
| 52 | 1 | 0 | -0.343359 | -2.154862 | 4.442713  |
| 53 | 1 | 0 | -1.324514 | -2.976367 | 3.197653  |

Int3 (DEADTS6nn.rev.log)  
 Standard orientation:

| Center Number | Atomic Number | Atomic Type | Coordinates (Angstroms) |           |           |
|---------------|---------------|-------------|-------------------------|-----------|-----------|
|               |               |             | X                       | Y         | Z         |
| 1             | 15            | 0           | 2.580737                | -0.453190 | 0.814410  |
| 2             | 8             | 0           | 1.715658                | -1.772280 | -0.111493 |
| 3             | 8             | 0           | 0.706872                | -1.225405 | -2.154113 |
| 4             | 8             | 0           | 1.929993                | 3.026634  | -0.775875 |
| 5             | 8             | 0           | -0.330828               | 3.326684  | -0.808995 |
| 6             | 7             | 0           | 1.468846                | 0.318863  | -0.460778 |
| 7             | 7             | 0           | 0.479150                | 1.303141  | -0.287988 |
| 8             | 6             | 0           | 1.916712                | -1.257424 | -2.907408 |
| 9             | 6             | 0           | 0.848160                | -0.935270 | -0.790931 |
| 10            | 6             | 0           | -0.109813               | 4.721691  | -1.059534 |
| 11            | 6             | 0           | 0.801340                | 2.589017  | -0.659945 |
| 12            | 1             | 0           | 2.463817                | -0.313455 | -2.806985 |
| 13            | 1             | 0           | 1.614967                | -1.399463 | -3.947363 |
| 14            | 1             | 0           | 2.554451                | -2.090056 | -2.591781 |
| 15            | 6             | 0           | 4.178725                | -0.215770 | -0.056692 |
| 16            | 1             | 0           | 0.441235                | 5.178012  | -0.232931 |
| 17            | 1             | 0           | 0.453532                | 4.861944  | -1.985427 |
| 18            | 1             | 0           | -1.104158               | 5.161093  | -1.146253 |
| 19            | 6             | 0           | 2.499818                | 1.014079  | 1.960088  |
| 20            | 6             | 0           | 3.024901                | -1.749377 | 2.079782  |
| 21            | 1             | 0           | 4.140152                | 0.712772  | -0.630204 |
| 22            | 1             | 0           | 4.362515                | -1.055139 | -0.732852 |
| 23            | 1             | 0           | 4.993695                | -0.165883 | 0.672329  |
| 24            | 1             | 0           | 3.313200                | -2.673708 | 1.572689  |
| 25            | 1             | 0           | 2.162551                | -1.952952 | 2.716130  |
| 26            | 1             | 0           | 3.854466                | -1.393345 | 2.699740  |
| 27            | 1             | 0           | 1.511826                | 1.061738  | 2.425187  |
| 28            | 1             | 0           | 2.662140                | 1.931597  | 1.387487  |
| 29            | 1             | 0           | 3.258396                | 0.924323  | 2.743620  |
| 30            | 6             | 0           | -0.873162               | 0.743169  | -0.477794 |
| 31            | 6             | 0           | -0.658302               | -0.791497 | -0.281387 |
| 32            | 6             | 0           | -0.802708               | -1.141720 | 1.201155  |
| 33            | 6             | 0           | -1.623031               | -1.607666 | -1.144526 |
| 34            | 6             | 0           | -1.880500               | 1.372373  | 0.491219  |
| 35            | 8             | 0           | 0.066932                | -1.027077 | 2.036111  |
| 36            | 8             | 0           | -2.448115               | -1.149308 | -1.900630 |
| 37            | 8             | 0           | -2.061098               | -1.510351 | 1.490797  |
| 38            | 8             | 0           | -1.412118               | -2.920547 | -0.951254 |
| 39            | 6             | 0           | -2.215009               | -3.796112 | -1.757875 |
| 40            | 6             | 0           | -2.343102               | -1.697686 | 2.891229  |
| 41            | 8             | 0           | -1.673419               | 1.591454  | 1.664926  |
| 42            | 8             | 0           | -3.040274               | 1.619402  | -0.134103 |
| 43            | 6             | 0           | -4.082077               | 2.165548  | 0.690651  |
| 44            | 1             | 0           | -1.231117               | 0.899992  | -1.497619 |
| 45            | 1             | 0           | -2.019387               | -3.618425 | -2.818504 |
| 46            | 1             | 0           | -3.277555               | -3.635871 | -1.556558 |
| 47            | 1             | 0           | -1.917109               | -4.806245 | -1.476149 |
| 48            | 1             | 0           | -2.179807               | -0.759860 | 3.427116  |
| 49            | 1             | 0           | -1.700883               | -2.476939 | 3.307888  |
| 50            | 1             | 0           | -3.390356               | -1.996519 | 2.936467  |
| 51            | 1             | 0           | -4.937323               | 2.298928  | 0.028292  |
| 52            | 1             | 0           | -3.769079               | 3.121976  | 1.117497  |
| 53            | 1             | 0           | -4.327731               | 1.475535  | 1.502241  |

TS3 (DEADTS6nn.log)  
 Standard orientation:

| Center Number | Atomic Number | Atomic Type | Coordinates (Angstroms) |          |          |
|---------------|---------------|-------------|-------------------------|----------|----------|
|               |               |             | X                       | Y        | Z        |
| 1             | 15            | 0           | 2.900903                | 0.601143 | 0.851139 |

|    |   |   |           |           |           |
|----|---|---|-----------|-----------|-----------|
| 2  | 8 | 0 | 2.288923  | -0.743978 | 0.261563  |
| 3  | 8 | 0 | 1.475920  | -1.297323 | -1.842675 |
| 4  | 8 | 0 | 0.352457  | 3.571138  | -0.791161 |
| 5  | 8 | 0 | -1.833700 | 2.896702  | -0.822417 |
| 6  | 7 | 0 | 1.086903  | 0.892961  | -1.001806 |
| 7  | 7 | 0 | -0.216579 | 1.352596  | -0.647652 |
| 8  | 6 | 0 | 2.387257  | -0.763292 | -2.795577 |
| 9  | 6 | 0 | 1.097334  | -0.450043 | -0.799220 |
| 10 | 6 | 0 | -2.213435 | 4.272830  | -0.736711 |
| 11 | 6 | 0 | -0.481654 | 2.675049  | -0.764381 |
| 12 | 1 | 0 | 2.078706  | 0.241796  | -3.098438 |
| 13 | 1 | 0 | 2.366267  | -1.447639 | -3.646609 |
| 14 | 1 | 0 | 3.406460  | -0.727801 | -2.389175 |
| 15 | 6 | 0 | 4.005420  | 1.501877  | -0.287009 |
| 16 | 1 | 0 | -1.923599 | 4.699114  | 0.228763  |
| 17 | 1 | 0 | -1.746125 | 4.854004  | -1.535497 |
| 18 | 1 | 0 | -3.299678 | 4.282797  | -0.842531 |
| 19 | 6 | 0 | 1.873024  | 1.839086  | 1.704868  |
| 20 | 6 | 0 | 3.992168  | -0.097017 | 2.141084  |
| 21 | 1 | 0 | 3.394520  | 2.043060  | -1.010711 |
| 22 | 1 | 0 | 4.661140  | 0.795545  | -0.804736 |
| 23 | 1 | 0 | 4.621046  | 2.202386  | 0.288617  |
| 24 | 1 | 0 | 4.674397  | -0.828031 | 1.699100  |
| 25 | 1 | 0 | 3.370366  | -0.604668 | 2.883827  |
| 26 | 1 | 0 | 4.572327  | 0.691621  | 2.630997  |
| 27 | 1 | 0 | 0.986539  | 1.354341  | 2.115799  |
| 28 | 1 | 0 | 1.572304  | 2.614879  | 0.997611  |
| 29 | 1 | 0 | 2.464422  | 2.267984  | 2.522632  |
| 30 | 6 | 0 | -1.190725 | 0.268087  | -0.659260 |
| 31 | 6 | 0 | -0.299755 | -0.962607 | -0.260964 |
| 32 | 6 | 0 | -0.396496 | -1.249658 | 1.251548  |
| 33 | 6 | 0 | -0.731532 | -2.220375 | -1.037716 |
| 34 | 6 | 0 | -2.359824 | 0.535535  | 0.292555  |
| 35 | 8 | 0 | 0.335235  | -0.871288 | 2.135658  |
| 36 | 8 | 0 | -1.539173 | -2.243118 | -1.937165 |
| 37 | 8 | 0 | -1.511822 | -1.974221 | 1.484228  |
| 38 | 8 | 0 | -0.074220 | -3.298300 | -0.579710 |
| 39 | 6 | 0 | -0.330290 | -4.519917 | -1.288015 |
| 40 | 6 | 0 | -1.830629 | -2.186255 | 2.869922  |
| 41 | 8 | 0 | -2.251002 | 0.901495  | 1.443208  |
| 42 | 8 | 0 | -3.528396 | 0.273778  | -0.311443 |
| 43 | 6 | 0 | -4.696733 | 0.470994  | 0.498831  |
| 44 | 1 | 0 | -1.583240 | 0.076638  | -1.662762 |
| 45 | 1 | 0 | -0.036009 | -4.417642 | -2.335765 |
| 46 | 1 | 0 | -1.390980 | -4.779664 | -1.235737 |
| 47 | 1 | 0 | 0.276826  | -5.277275 | -0.791422 |
| 48 | 1 | 0 | -2.019226 | -1.225686 | 3.355267  |
| 49 | 1 | 0 | -1.010570 | -2.700344 | 3.376771  |
| 50 | 1 | 0 | -2.729201 | -2.803938 | 2.868779  |
| 51 | 1 | 0 | -5.542171 | 0.223614  | -0.143325 |
| 52 | 1 | 0 | -4.756381 | 1.509623  | 0.834480  |
| 53 | 1 | 0 | -4.672503 | -0.185611 | 1.372780  |

3m + Me3PO (DEADTS6nn.for.log)  
 Standard orientation:

| Center Number | Atomic Number | Atomic Type | Coordinates (Angstroms) |           |           |
|---------------|---------------|-------------|-------------------------|-----------|-----------|
|               |               |             | X                       | Y         | Z         |
| 1             | 15            | 0           | 4.342029                | -0.575420 | 0.546849  |
| 2             | 8             | 0           | 4.057915                | -1.894767 | -0.126974 |
| 3             | 8             | 0           | 0.142954                | -2.366262 | -1.246185 |
| 4             | 8             | 0           | 1.604205                | 2.490074  | -1.693819 |
| 5             | 8             | 0           | -0.452955               | 3.242857  | -1.056230 |
| 6             | 7             | 0           | 0.643481                | -0.096938 | -1.292569 |
| 7             | 7             | 0           | -0.028434               | 1.062105  | -0.903504 |
| 8             | 6             | 0           | 1.426247                | -2.666761 | -1.852124 |
| 9             | 6             | 0           | -0.111642               | -1.091846 | -1.004007 |
| 10            | 6             | 0           | -0.002266               | 4.581068  | -1.307063 |
| 11            | 6             | 0           | 0.486644                | 2.279349  | -1.268892 |
| 12            | 1             | 0           | 1.516742                | -2.127697 | -2.800119 |
| 13            | 1             | 0           | 1.405954                | -3.743317 | -2.022632 |
| 14            | 1             | 0           | 2.245220                | -2.389448 | -1.181246 |
| 15            | 6             | 0           | 4.445240                | 0.852428  | -0.590311 |
| 16            | 1             | 0           | 0.822708                | 4.841755  | -0.638607 |



|    |   |   |           |           |           |
|----|---|---|-----------|-----------|-----------|
| 17 | 1 | 0 | 0.329245  | 4.687263  | -2.342830 |
| 18 | 1 | 0 | -0.866414 | 5.217791  | -1.113972 |
| 19 | 6 | 0 | 3.109854  | -0.100926 | 1.815054  |
| 20 | 6 | 0 | 5.944566  | -0.569979 | 1.444528  |
| 21 | 1 | 0 | 3.475731  | 1.032726  | -1.065488 |
| 22 | 1 | 0 | 5.183821  | 0.632599  | -1.368187 |
| 23 | 1 | 0 | 4.749760  | 1.761734  | -0.059929 |
| 24 | 1 | 0 | 6.755417  | -0.770639 | 0.737187  |
| 25 | 1 | 0 | 5.939935  | -1.366487 | 2.195233  |
| 26 | 1 | 0 | 6.132981  | 0.388255  | 1.940776  |
| 27 | 1 | 0 | 3.093261  | -0.859957 | 2.603454  |
| 28 | 1 | 0 | 2.114439  | -0.061664 | 1.364222  |
| 29 | 1 | 0 | 3.342084  | 0.873322  | 2.258774  |
| 30 | 6 | 0 | -1.426450 | 0.814405  | -0.518308 |
| 31 | 6 | 0 | -1.431145 | -0.736364 | -0.316772 |
| 32 | 6 | 0 | -1.362775 | -1.167794 | 1.163315  |
| 33 | 6 | 0 | -2.625755 | -1.387569 | -1.037975 |
| 34 | 6 | 0 | -1.816668 | 1.615401  | 0.726510  |
| 35 | 8 | 0 | -0.376244 | -1.584587 | 1.716566  |
| 36 | 8 | 0 | -3.298961 | -0.839678 | -1.880806 |
| 37 | 8 | 0 | -2.556190 | -0.977373 | 1.756371  |
| 38 | 8 | 0 | -2.781258 | -2.655754 | -0.641623 |
| 39 | 6 | 0 | -3.823320 | -3.394310 | -1.307059 |
| 40 | 6 | 0 | -2.585292 | -1.250699 | 3.170981  |
| 41 | 8 | 0 | -1.124948 | 1.742113  | 1.711199  |
| 42 | 8 | 0 | -3.046289 | 2.131534  | 0.581141  |
| 43 | 6 | 0 | -3.539001 | 2.875156  | 1.708262  |
| 44 | 1 | 0 | -2.113512 | 1.055660  | -1.333888 |
| 45 | 1 | 0 | -3.627694 | -3.438865 | -2.381030 |
| 46 | 1 | 0 | -4.792675 | -2.920193 | -1.134657 |
| 47 | 1 | 0 | -3.795433 | -4.391035 | -0.867823 |
| 48 | 1 | 0 | -1.909386 | -0.569636 | 3.693560  |
| 49 | 1 | 0 | -2.285568 | -2.283263 | 3.363385  |
| 50 | 1 | 0 | -3.618270 | -1.084445 | 3.477064  |
| 51 | 1 | 0 | -4.527859 | 3.227518  | 1.415080  |
| 52 | 1 | 0 | -2.876927 | 3.716499  | 1.927694  |
| 53 | 1 | 0 | -3.604573 | 2.232060  | 2.589798  |

TS4 (DEADTS7n.log)

Standard orientation:

| Center Number | Atomic Number | Atomic Type | Coordinates (Angstroms) |           |           |
|---------------|---------------|-------------|-------------------------|-----------|-----------|
|               |               |             | X                       | Y         | Z         |
| 1             | 15            | 0           | 2.168437                | -1.352160 | -1.149375 |
| 2             | 8             | 0           | -0.559311               | -0.180095 | -2.450775 |
| 3             | 8             | 0           | -0.092576               | 1.857277  | -1.456226 |
| 4             | 8             | 0           | 3.053802                | 1.815249  | 0.308519  |
| 5             | 8             | 0           | 1.667648                | 2.022406  | 2.099444  |
| 6             | 7             | 0           | 1.302897                | -0.008294 | -0.744392 |
| 7             | 7             | 0           | 1.248136                | 0.405716  | 0.583561  |
| 8             | 6             | 0           | 0.520481                | 2.344610  | -2.643133 |
| 9             | 6             | 0           | -0.291822               | 0.468266  | -1.429496 |
| 10            | 6             | 0           | 2.495310                | 3.095484  | 2.565570  |
| 11            | 6             | 0           | 2.064014                | 1.469808  | 0.927094  |
| 12            | 1             | 0           | 1.582903                | 2.070435  | -2.664010 |
| 13            | 1             | 0           | 0.430388                | 3.432975  | -2.608379 |
| 14            | 1             | 0           | 0.016951                | 1.949603  | -3.530150 |
| 15            | 6             | 0           | 2.463105                | -1.148138 | -2.928917 |
| 16            | 1             | 0           | 3.521148                | 2.751516  | 2.723021  |
| 17            | 1             | 0           | 2.501435                | 3.918577  | 1.846381  |
| 18            | 1             | 0           | 2.049086                | 3.415455  | 3.507873  |
| 19            | 6             | 0           | 3.735760                | -1.354607 | -0.222819 |
| 20            | 6             | 0           | 1.467155                | -3.027266 | -0.934394 |
| 21            | 1             | 0           | 3.123265                | -0.293059 | -3.094664 |
| 22            | 1             | 0           | 1.487743                | -0.941928 | -3.382394 |
| 23            | 1             | 0           | 2.903283                | -2.051548 | -3.361142 |
| 24            | 1             | 0           | 0.535209                | -3.106411 | -1.496127 |
| 25            | 1             | 0           | 1.246411                | -3.190323 | 0.122315  |
| 26            | 1             | 0           | 2.191979                | -3.769193 | -1.289624 |
| 27            | 1             | 0           | 3.504571                | -1.560894 | 0.826659  |
| 28            | 1             | 0           | 4.195959                | -0.366969 | -0.297954 |
| 29            | 1             | 0           | 4.406857                | -2.129308 | -0.607310 |
| 30            | 6             | 0           | -0.090272               | 0.210096  | 1.142393  |
| 31            | 6             | 0           | -1.117487               | 0.233379  | -0.039106 |

|    |   |   |           |           |           |
|----|---|---|-----------|-----------|-----------|
| 32 | 6 | 0 | -1.815020 | -1.112185 | -0.238024 |
| 33 | 6 | 0 | -2.093626 | 1.407497  | 0.173636  |
| 34 | 6 | 0 | -0.091989 | -1.047379 | 2.015985  |
| 35 | 8 | 0 | -1.253791 | -2.179724 | -0.079535 |
| 36 | 8 | 0 | -2.154482 | 2.065046  | 1.193324  |
| 37 | 8 | 0 | -3.089157 | -1.010589 | -0.624936 |
| 38 | 8 | 0 | -2.862555 | 1.638971  | -0.896821 |
| 39 | 6 | 0 | -3.755963 | 2.753935  | -0.779594 |
| 40 | 6 | 0 | -3.739276 | -2.251053 | -0.943381 |
| 41 | 8 | 0 | 0.853933  | -1.786192 | 2.191208  |
| 42 | 8 | 0 | -1.272588 | -1.170415 | 2.649039  |
| 43 | 6 | 0 | -1.418299 | -2.343973 | 3.464400  |
| 44 | 1 | 0 | -0.336280 | 1.044369  | 1.800224  |
| 45 | 1 | 0 | -3.194017 | 3.677799  | -0.617289 |
| 46 | 1 | 0 | -4.450039 | 2.608033  | 0.052711  |
| 47 | 1 | 0 | -4.294625 | 2.793789  | -1.726845 |
| 48 | 1 | 0 | -3.745783 | -2.916955 | -0.076452 |
| 49 | 1 | 0 | -3.224950 | -2.741958 | -1.773073 |
| 50 | 1 | 0 | -4.755508 | -1.978851 | -1.228895 |
| 51 | 1 | 0 | -2.404544 | -2.261523 | 3.921996  |
| 52 | 1 | 0 | -0.639648 | -2.378805 | 4.230295  |
| 53 | 1 | 0 | -1.355376 | -3.240700 | 2.842048  |

Int4 (DEADTS7n.rev.log)

Standard orientation:

| Center<br>Number | Atomic<br>Number | Atomic<br>Type | Coordinates (Angstroms) |           |           |
|------------------|------------------|----------------|-------------------------|-----------|-----------|
|                  |                  |                | X                       | Y         | Z         |
| 1                | 15               | 0              | 2.752967                | -1.089821 | -0.812934 |
| 2                | 8                | 0              | -1.009063               | 0.204217  | -2.604605 |
| 3                | 8                | 0              | -0.426608               | 2.007348  | -1.358107 |
| 4                | 8                | 0              | 2.810132                | 2.211965  | 0.257351  |
| 5                | 8                | 0              | 1.164913                | 2.368454  | 1.818358  |
| 6                | 7                | 0              | 1.566827                | 0.014206  | -0.820432 |
| 7                | 7                | 0              | 1.188636                | 0.582284  | 0.415981  |
| 8                | 6                | 0              | 0.120639                | 2.640581  | -2.527062 |
| 9                | 6                | 0              | -0.845071               | 0.744897  | -1.536369 |
| 10               | 6                | 0              | 1.782123                | 3.579543  | 2.262536  |
| 11               | 6                | 0              | 1.797662                | 1.762645  | 0.768417  |
| 12               | 1                | 0              | 1.030058                | 2.111908  | -2.821462 |
| 13               | 1                | 0              | 0.353242                | 3.661417  | -2.223432 |
| 14               | 1                | 0              | -0.605220               | 2.631133  | -3.343721 |
| 15               | 6                | 0              | 3.467618                | -0.976033 | -2.486954 |
| 16               | 1                | 0              | 2.809925                | 3.396620  | 2.588390  |
| 17               | 1                | 0              | 1.793852                | 4.327099  | 1.464409  |
| 18               | 1                | 0              | 1.172716                | 3.925787  | 3.098994  |
| 19               | 6                | 0              | 4.092372                | -0.810280 | 0.403429  |
| 20               | 6                | 0              | 2.324082                | -2.869996 | -0.622976 |
| 21               | 1                | 0              | 3.934794                | 0.004368  | -2.609757 |
| 22               | 1                | 0              | 2.656181                | -1.068496 | -3.214974 |
| 23               | 1                | 0              | 4.204467                | -1.765608 | -2.663415 |
| 24               | 1                | 0              | 1.511495                | -3.115372 | -1.311004 |
| 25               | 1                | 0              | 1.970138                | -3.042214 | 0.395511  |
| 26               | 1                | 0              | 3.194212                | -3.504470 | -0.827801 |
| 27               | 1                | 0              | 3.666437                | -0.937886 | 1.402984  |
| 28               | 1                | 0              | 4.457235                | 0.214234  | 0.301862  |
| 29               | 1                | 0              | 4.908114                | -1.527398 | 0.264311  |
| 30               | 6                | 0              | -0.112100               | 0.207238  | 0.926979  |
| 31               | 6                | 0              | -1.251257               | 0.122530  | -0.172179 |
| 32               | 6                | 0              | -1.629867               | -1.336972 | -0.510941 |
| 33               | 6                | 0              | -2.484687               | 0.902338  | 0.353900  |
| 34               | 6                | 0              | 0.011597                | -1.058199 | 1.790822  |
| 35               | 8                | 0              | -0.842227               | -2.255352 | -0.525015 |
| 36               | 8                | 0              | -2.709411               | 1.123569  | 1.522255  |
| 37               | 8                | 0              | -2.929488               | -1.463458 | -0.808948 |
| 38               | 8                | 0              | -3.271294               | 1.320015  | -0.649789 |
| 39               | 6                | 0              | -4.456720               | 2.027922  | -0.252222 |
| 40               | 6                | 0              | -3.336858               | -2.770698 | -1.247619 |
| 41               | 8                | 0              | 1.055824                | -1.589671 | 2.102693  |
| 42               | 8                | 0              | -1.189234               | -1.441427 | 2.260057  |
| 43               | 6                | 0              | -1.187257               | -2.610891 | 3.094157  |
| 44               | 1                | 0              | -0.431086               | 0.979190  | 1.627686  |
| 45               | 1                | 0              | -4.194954               | 2.919350  | 0.323508  |
| 46               | 1                | 0              | -5.097655               | 1.383680  | 0.355298  |

|    |   |   |           |           |           |
|----|---|---|-----------|-----------|-----------|
| 47 | 1 | 0 | -4.955987 | 2.300913  | -1.181921 |
| 48 | 1 | 0 | -3.128203 | -3.516251 | -0.476149 |
| 49 | 1 | 0 | -2.806427 | -3.039179 | -2.164279 |
| 50 | 1 | 0 | -4.408506 | -2.693609 | -1.431364 |
| 51 | 1 | 0 | -2.217323 | -2.730429 | 3.430776  |
| 52 | 1 | 0 | -0.516410 | -2.473059 | 3.945398  |
| 53 | 1 | 0 | -0.865854 | -3.482859 | 2.517808  |

9 + A (ADEADTSlc.rev.log)  
 Standard orientation:

| Center<br>Number | Atomic<br>Number | Atomic<br>Type | Coordinates (Angstroms) |           |           |
|------------------|------------------|----------------|-------------------------|-----------|-----------|
|                  |                  |                | X                       | Y         | Z         |
| 1                | 15               | 0              | -0.769426               | -1.603186 | -1.272103 |
| 2                | 8                | 0              | -0.818408               | -2.945662 | 1.187600  |
| 3                | 8                | 0              | -1.519973               | -1.185537 | 2.443664  |
| 4                | 8                | 0              | -3.427686               | -0.229322 | -0.766143 |
| 5                | 8                | 0              | -3.216843               | 1.863213  | 0.104938  |
| 6                | 7                | 0              | -1.079079               | -0.883351 | 0.239356  |
| 7                | 7                | 0              | -1.488906               | 0.478172  | 0.352258  |
| 8                | 6                | 0              | -1.560866               | -2.065113 | 3.577485  |
| 9                | 6                | 0              | -1.127500               | -1.761382 | 1.305737  |
| 10               | 6                | 0              | -4.489620               | 2.145463  | -0.468692 |
| 11               | 6                | 0              | -2.738756               | 0.594917  | -0.135486 |
| 12               | 1                | 0              | -2.254873               | -2.891125 | 3.401207  |
| 13               | 1                | 0              | -1.905177               | -1.445168 | 4.405517  |
| 14               | 1                | 0              | -0.567731               | -2.470559 | 3.788724  |
| 15               | 6                | 0              | -1.999790               | -2.859206 | -1.744770 |
| 16               | 1                | 0              | -4.462278               | 2.075311  | -1.561705 |
| 17               | 1                | 0              | -5.254847               | 1.456824  | -0.097954 |
| 18               | 1                | 0              | -4.727705               | 3.168688  | -0.168305 |
| 19               | 6                | 0              | -0.794164               | -0.263528 | -2.488855 |
| 20               | 6                | 0              | 0.874408                | -2.386678 | -1.316264 |
| 21               | 1                | 0              | -2.978629               | -2.378168 | -1.691061 |
| 22               | 1                | 0              | -1.946846               | -3.688167 | -1.036441 |
| 23               | 1                | 0              | -1.794807               | -3.219001 | -2.758819 |
| 24               | 1                | 0              | 0.889183                | -3.211242 | -0.602323 |
| 25               | 1                | 0              | 1.657919                | -1.671907 | -1.049526 |
| 26               | 1                | 0              | 1.063298                | -2.766336 | -2.326521 |
| 27               | 1                | 0              | -0.201698               | 0.586056  | -2.139094 |
| 28               | 1                | 0              | -1.829229               | 0.055049  | -2.623790 |
| 29               | 1                | 0              | -0.389555               | -0.644201 | -3.432261 |
| 30               | 6                | 0              | 2.109913                | 1.673296  | -0.036617 |
| 31               | 6                | 0              | 3.073302                | 0.939086  | -0.035168 |
| 32               | 6                | 0              | 4.146146                | -0.028075 | -0.067594 |
| 33               | 6                | 0              | 0.958875                | 2.555608  | -0.177729 |
| 34               | 8                | 0              | 3.992010                | -1.188412 | -0.399848 |
| 35               | 8                | 0              | 5.315643                | 0.512974  | 0.306388  |
| 36               | 6                | 0              | 6.440455                | -0.387813 | 0.293381  |
| 37               | 8                | 0              | 0.456298                | 2.781057  | -1.260859 |
| 38               | 8                | 0              | 0.600996                | 3.073006  | 0.991895  |
| 39               | 6                | 0              | -0.612483               | 3.862705  | 0.979333  |
| 40               | 1                | 0              | 6.603913                | -0.778421 | -0.714156 |
| 41               | 1                | 0              | 6.268405                | -1.220906 | 0.979299  |
| 42               | 1                | 0              | 7.290265                | 0.211743  | 0.618224  |
| 43               | 1                | 0              | -0.704858               | 4.245853  | 1.995454  |
| 44               | 1                | 0              | -1.456392               | 3.220601  | 0.720637  |
| 45               | 1                | 0              | -0.516914               | 4.682921  | 0.263495  |

TS1a (ADEADTSlc.log)  
 Standard orientation:

| Center<br>Number | Atomic<br>Number | Atomic<br>Type | Coordinates (Angstroms) |           |           |
|------------------|------------------|----------------|-------------------------|-----------|-----------|
|                  |                  |                | X                       | Y         | Z         |
| 1                | 15               | 0              | 0.700710                | -1.849289 | -1.288715 |
| 2                | 8                | 0              | 2.576362                | -1.715984 | 0.796727  |
| 3                | 8                | 0              | 1.291215                | -0.550841 | 2.268688  |
| 4                | 8                | 0              | -1.781489               | -2.454621 | 0.575713  |
| 5                | 8                | 0              | -2.791707               | -0.540037 | 1.278826  |
| 6                | 7                | 0              | 0.476189                | -1.053314 | 0.212376  |
| 7                | 7                | 0              | -0.700059               | -0.390930 | 0.539392  |

|    |   |   |           |           |           |
|----|---|---|-----------|-----------|-----------|
| 8  | 6 | 0 | 2.385634  | -0.565854 | 3.201755  |
| 9  | 6 | 0 | 1.539931  | -1.138425 | 1.103295  |
| 10 | 6 | 0 | -4.012697 | -1.276214 | 1.388354  |
| 11 | 6 | 0 | -1.742177 | -1.237695 | 0.779326  |
| 12 | 1 | 0 | 2.684188  | -1.592352 | 3.428253  |
| 13 | 1 | 0 | 2.003666  | -0.068370 | 4.092730  |
| 14 | 1 | 0 | 3.239430  | -0.019328 | 2.793872  |
| 15 | 6 | 0 | 0.865367  | -3.642962 | -1.038066 |
| 16 | 1 | 0 | -4.375932 | -1.577392 | 0.400734  |
| 17 | 1 | 0 | -3.877910 | -2.167253 | 2.006718  |
| 18 | 1 | 0 | -4.723329 | -0.592651 | 1.856062  |
| 19 | 6 | 0 | -0.790593 | -1.539620 | -2.264609 |
| 20 | 6 | 0 | 2.140239  | -1.217756 | -2.195659 |
| 21 | 1 | 0 | -0.012295 | -3.973213 | -0.476657 |
| 22 | 1 | 0 | 1.774150  | -3.842549 | -0.467266 |
| 23 | 1 | 0 | 0.913268  | -4.151064 | -2.006990 |
| 24 | 1 | 0 | 3.052574  | -1.544985 | -1.695281 |
| 25 | 1 | 0 | 2.119020  | -0.119351 | -2.207035 |
| 26 | 1 | 0 | 2.109773  | -1.609434 | -3.218475 |
| 27 | 1 | 0 | -1.076239 | -0.485364 | -2.224226 |
| 28 | 1 | 0 | -1.609008 | -2.132288 | -1.852153 |
| 29 | 1 | 0 | -0.588409 | -1.837355 | -3.298442 |
| 30 | 6 | 0 | -0.663598 | 1.429147  | -0.182554 |
| 31 | 6 | 0 | 0.455807  | 1.947808  | -0.370429 |
| 32 | 6 | 0 | 1.827883  | 2.199020  | -0.563265 |
| 33 | 6 | 0 | -2.075498 | 1.667905  | -0.519963 |
| 34 | 8 | 0 | 2.481379  | 1.868551  | -1.555975 |
| 35 | 8 | 0 | 2.383351  | 2.901375  | 0.466444  |
| 36 | 6 | 0 | 3.765490  | 3.230944  | 0.292801  |
| 37 | 8 | 0 | -2.725325 | 0.986932  | -1.293222 |
| 38 | 8 | 0 | -2.552182 | 2.773250  | 0.078955  |
| 39 | 6 | 0 | -3.905030 | 3.114237  | -0.260257 |
| 40 | 1 | 0 | 3.912053  | 3.854902  | -0.593873 |
| 41 | 1 | 0 | 4.377334  | 2.329442  | 0.189192  |
| 42 | 1 | 0 | 4.047689  | 3.780215  | 1.192747  |
| 43 | 1 | 0 | -4.127365 | 4.017568  | 0.308535  |
| 44 | 1 | 0 | -4.584855 | 2.304975  | 0.019635  |
| 45 | 1 | 0 | -3.998745 | 3.302656  | -1.333346 |

Int1a (ADEADTSlcR.for.log)

Standard orientation:

| Center Number | Atomic Number | Atomic Type | Coordinates (Angstroms) |           |           |
|---------------|---------------|-------------|-------------------------|-----------|-----------|
|               |               |             | X                       | Y         | Z         |
| 1             | 15            | 0           | 0.917921                | -1.567075 | -1.526496 |
| 2             | 8             | 0           | 2.864480                | -1.255772 | 0.493811  |
| 3             | 8             | 0           | 1.566424                | -0.084821 | 1.951217  |
| 4             | 8             | 0           | -0.915132               | -2.421847 | 1.271618  |
| 5             | 8             | 0           | -2.177830               | -0.636346 | 1.893586  |
| 6             | 7             | 0           | 0.708542                | -0.751658 | -0.035280 |
| 7             | 7             | 0           | -0.539969               | -0.326917 | 0.386294  |
| 8             | 6             | 0           | 2.685718                | 0.040272  | 2.849362  |
| 9             | 6             | 0           | 1.816196                | -0.721755 | 0.817748  |
| 10            | 6             | 0           | -3.082101               | -1.522300 | 2.568872  |
| 11            | 6             | 0           | -1.206291               | -1.237415 | 1.195636  |
| 12            | 1             | 0           | 3.058683                | -0.947253 | 3.130720  |
| 13            | 1             | 0           | 2.292679                | 0.570288  | 3.715704  |
| 14            | 1             | 0           | 3.483354                | 0.616268  | 2.375581  |
| 15            | 6             | 0           | 1.062883                | -3.356393 | -1.243036 |
| 16            | 1             | 0           | -3.645602               | -2.111296 | 1.840101  |
| 17            | 1             | 0           | -2.538276               | -2.190614 | 3.240233  |
| 18            | 1             | 0           | -3.753432               | -0.872962 | 3.131202  |
| 19            | 6             | 0           | -0.571124               | -1.211946 | -2.485804 |
| 20            | 6             | 0           | 2.339388                | -0.914974 | -2.437226 |
| 21            | 1             | 0           | 0.211174                | -3.675321 | -0.636502 |
| 22            | 1             | 0           | 1.986836                | -3.547575 | -0.692373 |
| 23            | 1             | 0           | 1.082511                | -3.888949 | -2.199485 |
| 24            | 1             | 0           | 3.269000                | -1.291863 | -2.011131 |
| 25            | 1             | 0           | 2.296031                | 0.179670  | -2.332250 |
| 26            | 1             | 0           | 2.246614                | -1.211481 | -3.487724 |
| 27            | 1             | 0           | -0.532949               | -0.166020 | -2.802478 |
| 28            | 1             | 0           | -1.478772               | -1.355392 | -1.891190 |
| 29            | 1             | 0           | -0.579827               | -1.865775 | -3.363779 |
| 30            | 6             | 0           | -1.041129               | 0.980133  | -0.101854 |

|    |   |   |           |           |           |
|----|---|---|-----------|-----------|-----------|
| 31 | 6 | 0 | -0.280288 | 2.027569  | -0.386036 |
| 32 | 6 | 0 | 1.106948  | 2.247754  | -0.424900 |
| 33 | 6 | 0 | -2.472011 | 0.878456  | -0.493111 |
| 34 | 8 | 0 | 1.867186  | 1.942729  | -1.365716 |
| 35 | 8 | 0 | 1.579471  | 2.993732  | 0.634709  |
| 36 | 6 | 0 | 2.917064  | 3.465449  | 0.489021  |
| 37 | 8 | 0 | -3.050758 | -0.167250 | -0.777721 |
| 38 | 8 | 0 | -3.085798 | 2.073761  | -0.549349 |
| 39 | 6 | 0 | -4.438468 | 2.044688  | -1.015234 |
| 40 | 1 | 0 | 3.018477  | 4.117899  | -0.384762 |
| 41 | 1 | 0 | 3.630707  | 2.640690  | 0.381373  |
| 42 | 1 | 0 | 3.130511  | 4.029458  | 1.400400  |
| 43 | 1 | 0 | -4.776369 | 3.081531  | -0.989116 |
| 44 | 1 | 0 | -5.061829 | 1.421895  | -0.366773 |
| 45 | 1 | 0 | -4.493395 | 1.652222  | -2.035274 |

Intlai (ADEADTS2.for.log)

Standard orientation:

| Center Number | Atomic Number | Atomic Type | Coordinates (Angstroms) |           |           |
|---------------|---------------|-------------|-------------------------|-----------|-----------|
|               |               |             | X                       | Y         | Z         |
| 1             | 15            | 0           | -1.822012               | -0.877684 | -1.480817 |
| 2             | 8             | 0           | -1.786050               | -2.630631 | 0.715083  |
| 3             | 8             | 0           | -1.277790               | -1.078312 | 2.307375  |
| 4             | 8             | 0           | -2.613546               | 2.018012  | 0.626048  |
| 5             | 8             | 0           | -0.555886               | 2.704171  | 1.315025  |
| 6             | 7             | 0           | -1.556167               | -0.427424 | 0.150549  |
| 7             | 7             | 0           | -0.751945               | 0.679391  | 0.379605  |
| 8             | 6             | 0           | -0.867484               | -2.100700 | 3.234050  |
| 9             | 6             | 0           | -1.498835               | -1.498984 | 1.070589  |
| 10            | 6             | 0           | -1.101674               | 4.003536  | 1.580073  |
| 11            | 6             | 0           | -1.418638               | 1.828170  | 0.771151  |
| 12            | 1             | 0           | -1.576883               | -2.930792 | 3.231621  |
| 13            | 1             | 0           | -0.841999               | -1.612965 | 4.208104  |
| 14            | 1             | 0           | 0.130151                | -2.444775 | 2.947895  |
| 15            | 6             | 0           | -3.501225               | -1.560224 | -1.615792 |
| 16            | 1             | 0           | -1.427803               | 4.478015  | 0.650489  |
| 17            | 1             | 0           | -1.948221               | 3.933052  | 2.267306  |
| 18            | 1             | 0           | -0.286776               | 4.570869  | 2.030518  |
| 19            | 6             | 0           | -1.777863               | 0.681877  | -2.393207 |
| 20            | 6             | 0           | -0.618808               | -2.057472 | -2.158677 |
| 21            | 1             | 0           | -4.208665               | -0.835905 | -1.202499 |
| 22            | 1             | 0           | -3.561642               | -2.494251 | -1.055631 |
| 23            | 1             | 0           | -3.735284               | -1.739672 | -2.670307 |
| 24            | 1             | 0           | -0.755434               | -3.016877 | -1.655793 |
| 25            | 1             | 0           | 0.410472                | -1.718170 | -1.977750 |
| 26            | 1             | 0           | -0.803802               | -2.165612 | -3.233607 |
| 27            | 1             | 0           | -0.806675               | 1.176018  | -2.274898 |
| 28            | 1             | 0           | -2.547064               | 1.343183  | -1.984196 |
| 29            | 1             | 0           | -1.976966               | 0.477101  | -3.449888 |
| 30            | 6             | 0           | 0.692520                | 0.460986  | 0.226234  |
| 31            | 6             | 0           | 1.165333                | -0.760209 | 0.475151  |
| 32            | 6             | 0           | 2.406592                | -1.276842 | -0.005892 |
| 33            | 6             | 0           | 1.349005                | 1.560454  | -0.527119 |
| 34            | 8             | 0           | 2.571184                | -1.678079 | -1.164355 |
| 35            | 8             | 0           | 3.363406                | -1.443070 | 0.953473  |
| 36            | 6             | 0           | 4.556319                | -2.092363 | 0.510558  |
| 37            | 8             | 0           | 0.785036                | 2.320560  | -1.306700 |
| 38            | 8             | 0           | 2.676271                | 1.605764  | -0.307234 |
| 39            | 6             | 0           | 3.404198                | 2.533119  | -1.121437 |
| 40            | 1             | 0           | 5.051354                | -1.518663 | -0.279450 |
| 41            | 1             | 0           | 4.343273                | -3.095475 | 0.127365  |
| 42            | 1             | 0           | 5.201374                | -2.153646 | 1.389741  |
| 43            | 1             | 0           | 4.443580                | 2.445544  | -0.803122 |
| 44            | 1             | 0           | 3.039334                | 3.552477  | -0.968194 |
| 45            | 1             | 0           | 3.306990                | 2.276635  | -2.180333 |

TS2a (ADEADTS2.log)

Standard orientation:

| Center Number | Atomic Number | Atomic Type | Coordinates (Angstroms) |   |   |
|---------------|---------------|-------------|-------------------------|---|---|
|               |               |             | X                       | Y | Z |

|    |    |   |           |           |           |
|----|----|---|-----------|-----------|-----------|
| 1  | 15 | 0 | -1.875246 | -1.201841 | -1.285057 |
| 2  | 8  | 0 | -0.750539 | -2.795629 | 0.638194  |
| 3  | 8  | 0 | -0.619116 | -1.237869 | 2.323503  |
| 4  | 8  | 0 | -2.890198 | 1.584061  | 0.989816  |
| 5  | 8  | 0 | -0.904734 | 2.652620  | 1.299121  |
| 6  | 7  | 0 | -1.444795 | -0.636714 | 0.270947  |
| 7  | 7  | 0 | -0.899390 | 0.643382  | 0.306154  |
| 8  | 6  | 0 | 0.265060  | -2.042537 | 3.111546  |
| 9  | 6  | 0 | -0.713001 | -1.630118 | 1.035393  |
| 10 | 6  | 0 | -1.623770 | 3.803627  | 1.764083  |
| 11 | 6  | 0 | -1.677995 | 1.626706  | 0.897214  |
| 12 | 1  | 0 | -0.040020 | -3.092056 | 3.084692  |
| 13 | 1  | 0 | 0.198034  | -1.648878 | 4.126533  |
| 14 | 1  | 0 | 1.285991  | -1.937416 | 2.727788  |
| 15 | 6  | 0 | -3.293835 | -2.317343 | -1.089884 |
| 16 | 1  | 0 | -2.257786 | 4.207122  | 0.969932  |
| 17 | 1  | 0 | -2.244703 | 3.546237  | 2.625601  |
| 18 | 1  | 0 | -0.857779 | 4.526911  | 2.044982  |
| 19 | 6  | 0 | -2.415022 | 0.296117  | -2.151540 |
| 20 | 6  | 0 | -0.578388 | -2.021872 | -2.268981 |
| 21 | 1  | 0 | -4.097476 | -1.782340 | -0.576903 |
| 22 | 1  | 0 | -2.978011 | -3.171883 | -0.488606 |
| 23 | 1  | 0 | -3.640160 | -2.655587 | -2.071858 |
| 24 | 1  | 0 | -0.464828 | -3.047759 | -1.917334 |
| 25 | 1  | 0 | 0.384226  | -1.514109 | -2.137758 |
| 26 | 1  | 0 | -0.872958 | -2.004199 | -3.324287 |
| 27 | 1  | 0 | -1.566136 | 0.976963  | -2.274396 |
| 28 | 1  | 0 | -3.175459 | 0.798681  | -1.547350 |
| 29 | 1  | 0 | -2.825567 | 0.022378  | -3.128365 |
| 30 | 6  | 0 | 0.540046  | 0.650927  | 0.081603  |
| 31 | 6  | 0 | 1.152380  | -0.504145 | 0.325169  |
| 32 | 6  | 0 | 2.442191  | -0.929716 | -0.145161 |
| 33 | 6  | 0 | 1.007918  | 1.808294  | -0.722637 |
| 34 | 8  | 0 | 2.665917  | -1.281601 | -1.302389 |
| 35 | 8  | 0 | 3.372517  | -1.046879 | 0.843240  |
| 36 | 6  | 0 | 4.631793  | -1.587281 | 0.429544  |
| 37 | 8  | 0 | 0.304043  | 2.448688  | -1.488918 |
| 38 | 8  | 0 | 2.324623  | 2.037975  | -0.562498 |
| 39 | 6  | 0 | 2.881892  | 3.042069  | -1.421578 |
| 40 | 1  | 0 | 5.105352  | -0.948860 | -0.322357 |
| 41 | 1  | 0 | 4.508967  | -2.589941 | 0.009146  |
| 42 | 1  | 0 | 5.244804  | -1.625878 | 1.331865  |
| 43 | 1  | 0 | 3.936403  | 3.103669  | -1.150882 |
| 44 | 1  | 0 | 2.386489  | 4.003639  | -1.262293 |
| 45 | 1  | 0 | 2.772878  | 2.754949  | -2.471191 |

Int2a (ADEADTS2.rev.log)

Standard orientation:

| Center Number | Atomic Number | Atomic Type | Coordinates (Angstroms) |           |           |
|---------------|---------------|-------------|-------------------------|-----------|-----------|
|               |               |             | X                       | Y         | Z         |
| 1             | 15            | 0           | 2.245528                | -0.800082 | -0.929152 |
| 2             | 8             | 0           | 2.309998                | 0.877583  | -0.024557 |
| 3             | 8             | 0           | 1.264487                | 0.957447  | 2.066625  |
| 4             | 8             | 0           | -0.119574               | -3.277020 | 1.059708  |
| 5             | 8             | 0           | -2.132696               | -2.275306 | 0.714315  |
| 6             | 7             | 0           | 1.091322                | -0.846789 | 0.423962  |
| 7             | 7             | 0           | -0.262009               | -1.156489 | 0.156429  |
| 8             | 6             | 0           | 2.485486                | 0.616353  | 2.717879  |
| 9             | 6             | 0           | 1.186626                | 0.621193  | 0.719657  |
| 10            | 6             | 0           | -2.786223               | -3.481759 | 1.142829  |
| 11            | 6             | 0           | -0.785586               | -2.333284 | 0.702337  |
| 12            | 1             | 0           | 2.661796                | -0.466768 | 2.687729  |
| 13            | 1             | 0           | 2.362905                | 0.930059  | 3.756974  |
| 14            | 1             | 0           | 3.335093                | 1.138933  | 2.268586  |
| 15            | 6             | 0           | 4.020008                | -1.070599 | -0.549531 |
| 16            | 1             | 0           | -2.525495               | -4.312704 | 0.482604  |
| 17            | 1             | 0           | -2.496139               | -3.728329 | 2.166871  |
| 18            | 1             | 0           | -3.852968               | -3.265478 | 1.086097  |
| 19            | 6             | 0           | 1.828928                | -2.524837 | -1.536578 |
| 20            | 6             | 0           | 1.971285                | 0.090958  | -2.516685 |
| 21            | 1             | 0           | 4.082114                | -1.520311 | 0.446805  |
| 22            | 1             | 0           | 4.545442                | -0.114823 | -0.532159 |

|    |   |   |           |           |           |
|----|---|---|-----------|-----------|-----------|
| 23 | 1 | 0 | 4.476333  | -1.754695 | -1.270290 |
| 24 | 1 | 0 | 2.518098  | 1.034517  | -2.516343 |
| 25 | 1 | 0 | 0.901735  | 0.310165  | -2.606546 |
| 26 | 1 | 0 | 2.263609  | -0.535490 | -3.364652 |
| 27 | 1 | 0 | 0.812766  | -2.553337 | -1.944053 |
| 28 | 1 | 0 | 1.881916  | -3.249073 | -0.719086 |
| 29 | 1 | 0 | 2.521318  | -2.822321 | -2.331866 |
| 30 | 6 | 0 | -0.957600 | 0.056022  | -0.046841 |
| 31 | 6 | 0 | -0.168065 | 1.121480  | 0.205622  |
| 32 | 6 | 0 | -0.549948 | 2.516348  | -0.066232 |
| 33 | 6 | 0 | -2.315479 | 0.049679  | -0.691257 |
| 34 | 8 | 0 | -1.527035 | 2.852911  | -0.713868 |
| 35 | 8 | 0 | 0.324850  | 3.387516  | 0.471760  |
| 36 | 6 | 0 | 0.035952  | 4.771641  | 0.231867  |
| 37 | 8 | 0 | -2.491294 | -0.380159 | -1.809334 |
| 38 | 8 | 0 | -3.247484 | 0.585425  | 0.098801  |
| 39 | 6 | 0 | -4.533499 | 0.777165  | -0.516421 |
| 40 | 1 | 0 | -0.930352 | 5.044169  | 0.665303  |
| 41 | 1 | 0 | 0.014176  | 4.980750  | -0.841305 |
| 42 | 1 | 0 | 0.842317  | 5.323937  | 0.714979  |
| 43 | 1 | 0 | -5.173024 | 1.178678  | 0.269486  |
| 44 | 1 | 0 | -4.926299 | -0.171485 | -0.890809 |
| 45 | 1 | 0 | -4.444780 | 1.488438  | -1.341250 |

Int3a (ADEADTS4.rev.log)

Standard orientation:

| Center<br>Number | Atomic<br>Number | Atomic<br>Type | Coordinates (Angstroms) |           |           |
|------------------|------------------|----------------|-------------------------|-----------|-----------|
|                  |                  |                | X                       | Y         | Z         |
| 1                | 15               | 0              | 2.320870                | -0.909456 | -0.793147 |
| 2                | 8                | 0              | 2.277448                | 0.650234  | -0.169342 |
| 3                | 8                | 0              | 1.468224                | 1.148642  | 1.965251  |
| 4                | 8                | 0              | -0.331957               | -3.321896 | 0.642610  |
| 5                | 8                | 0              | -2.333177               | -2.239023 | 0.529321  |
| 6                | 7                | 0              | 0.944035                | -0.864903 | 0.685709  |
| 7                | 7                | 0              | -0.432757               | -1.042229 | 0.405078  |
| 8                | 6                | 0              | 2.557912                | 0.561761  | 2.670364  |
| 9                | 6                | 0              | 1.145513                | 0.573995  | 0.743670  |
| 10               | 6                | 0              | -2.998084               | -3.512608 | 0.520598  |
| 11               | 6                | 0              | -0.985377               | -2.301622 | 0.545511  |
| 12               | 1                | 0              | 2.402917                | -0.514914 | 2.805320  |
| 13               | 1                | 0              | 2.580855                | 1.053089  | 3.645409  |
| 14               | 1                | 0              | 3.509373                | 0.739284  | 2.154540  |
| 15               | 6                | 0              | 3.725660                | -0.405692 | -1.921315 |
| 16               | 1                | 0              | -2.706070               | -4.092442 | -0.358797 |
| 17               | 1                | 0              | -2.752362               | -4.076282 | 1.423598  |
| 18               | 1                | 0              | -4.062451               | -3.279895 | 0.489481  |
| 19               | 6                | 0              | 3.133945                | -2.326270 | 0.052327  |
| 20               | 6                | 0              | 1.130901                | -1.516435 | -2.059567 |
| 21               | 1                | 0              | 4.581491                | -0.056921 | -1.334596 |
| 22               | 1                | 0              | 3.413518                | 0.412347  | -2.578096 |
| 23               | 1                | 0              | 4.046002                | -1.251758 | -2.539202 |
| 24               | 1                | 0              | 0.371447                | -0.757203 | -2.270396 |
| 25               | 1                | 0              | 0.629280                | -2.410463 | -1.682288 |
| 26               | 1                | 0              | 1.659943                | -1.752466 | -2.986267 |
| 27               | 1                | 0              | 2.366959                | -3.021779 | 0.398171  |
| 28               | 1                | 0              | 3.671916                | -1.946713 | 0.927032  |
| 29               | 1                | 0              | 3.850384                | -2.818173 | -0.612502 |
| 30               | 6                | 0              | -1.034750               | 0.165302  | 0.093809  |
| 31               | 6                | 0              | -0.140631               | 1.178430  | 0.229864  |
| 32               | 6                | 0              | -0.423341               | 2.572758  | -0.114133 |
| 33               | 6                | 0              | -2.408964               | 0.253014  | -0.511830 |
| 34               | 8                | 0              | -1.481164               | 2.968214  | -0.578894 |
| 35               | 8                | 0              | 0.631818                | 3.379744  | 0.124512  |
| 36               | 6                | 0              | 0.428409                | 4.761156  | -0.199325 |
| 37               | 8                | 0              | -2.622831               | -0.073716 | -1.657875 |
| 38               | 8                | 0              | -3.303061               | 0.745525  | 0.345075  |
| 39               | 6                | 0              | -4.600850               | 1.016294  | -0.214384 |
| 40               | 1                | 0              | -0.392764               | 5.178892  | 0.389870  |
| 41               | 1                | 0              | 0.196629                | 4.879596  | -1.261622 |
| 42               | 1                | 0              | 1.367349                | 5.258175  | 0.046476  |
| 43               | 1                | 0              | -5.204311               | 1.378375  | 0.617746  |
| 44               | 1                | 0              | -5.032553               | 0.107539  | -0.641199 |
| 45               | 1                | 0              | -4.513998               | 1.781182  | -0.989796 |

TS3a (ADEADTS4.log)

Standard orientation:

| Center<br>Number | Atomic<br>Number | Atomic<br>Type | Coordinates (Angstroms) |           |           |
|------------------|------------------|----------------|-------------------------|-----------|-----------|
|                  |                  |                | X                       | Y         | Z         |
| 1                | 15               | 0              | 2.435966                | -0.934527 | -0.869408 |
| 2                | 8                | 0              | 2.275085                | 0.535773  | -0.252817 |
| 3                | 8                | 0              | 1.620520                | 1.156546  | 1.915479  |
| 4                | 8                | 0              | -0.489752               | -3.301378 | 0.653105  |
| 5                | 8                | 0              | -2.465957               | -2.180084 | 0.491574  |
| 6                | 7                | 0              | 0.813060                | -0.882355 | 0.909083  |
| 7                | 7                | 0              | -0.545873               | -1.006321 | 0.547375  |
| 8                | 6                | 0              | 2.576571                | 0.439942  | 2.686710  |
| 9                | 6                | 0              | 1.082161                | 0.497623  | 0.827816  |
| 10               | 6                | 0              | -3.143479               | -3.439427 | 0.365314  |
| 11               | 6                | 0              | -1.120525               | -2.264633 | 0.573919  |
| 12               | 1                | 0              | 2.206699                | -0.561094 | 2.932698  |
| 13               | 1                | 0              | 2.721940                | 1.021413  | 3.599795  |
| 14               | 1                | 0              | 3.535702                | 0.362739  | 2.157459  |
| 15               | 6                | 0              | 3.772674                | -0.526143 | -2.068103 |
| 16               | 1                | 0              | -2.817355               | -3.963522 | -0.537079 |
| 17               | 1                | 0              | -2.947234               | -4.066858 | 1.237934  |
| 18               | 1                | 0              | -4.202677               | -3.190321 | 0.300124  |
| 19               | 6                | 0              | 3.186415                | -2.278081 | 0.120082  |
| 20               | 6                | 0              | 1.111071                | -1.612941 | -1.931958 |
| 21               | 1                | 0              | 4.648998                | -0.144950 | -1.536089 |
| 22               | 1                | 0              | 3.426114                | 0.250672  | -2.755609 |
| 23               | 1                | 0              | 4.062518                | -1.411077 | -2.644562 |
| 24               | 1                | 0              | 0.327233                | -0.865628 | -2.085734 |
| 25               | 1                | 0              | 0.671520                | -2.487637 | -1.448709 |
| 26               | 1                | 0              | 1.527258                | -1.892188 | -2.905061 |
| 27               | 1                | 0              | 2.398047                | -2.866202 | 0.589324  |
| 28               | 1                | 0              | 3.811299                | -1.834361 | 0.900696  |
| 29               | 1                | 0              | 3.818135                | -2.899895 | -0.524328 |
| 30               | 6                | 0              | -1.090585               | 0.195916  | 0.167789  |
| 31               | 6                | 0              | -0.140465               | 1.169981  | 0.297675  |
| 32               | 6                | 0              | -0.347931               | 2.563564  | -0.087002 |
| 33               | 6                | 0              | -2.430505               | 0.329006  | -0.497330 |
| 34               | 8                | 0              | -1.384169               | 2.997229  | -0.569400 |
| 35               | 8                | 0              | 0.742095                | 3.330910  | 0.133793  |
| 36               | 6                | 0              | 0.599089                | 4.708416  | -0.230950 |
| 37               | 8                | 0              | -2.607955               | 0.010124  | -1.652727 |
| 38               | 8                | 0              | -3.347261               | 0.852380  | 0.318010  |
| 39               | 6                | 0              | -4.607755               | 1.163257  | -0.300976 |
| 40               | 1                | 0              | -0.211620               | 5.177026  | 0.334274  |
| 41               | 1                | 0              | 0.385638                | 4.807831  | -1.299276 |
| 42               | 1                | 0              | 1.554407                | 5.174387  | 0.013651  |
| 43               | 1                | 0              | -5.234825               | 1.554400  | 0.500127  |
| 44               | 1                | 0              | -5.052651               | 0.266272  | -0.739345 |
| 45               | 1                | 0              | -4.460212               | 1.916760  | -1.078444 |

10m + Me3PO

(ADEADTS4.for.log)

Standard orientation:

| Center<br>Number | Atomic<br>Number | Atomic<br>Type | Coordinates (Angstroms) |           |           |
|------------------|------------------|----------------|-------------------------|-----------|-----------|
|                  |                  |                | X                       | Y         | Z         |
| 1                | 15               | 0              | -4.501145               | 0.334609  | 0.395831  |
| 2                | 8                | 0              | -4.058779               | 1.773965  | 0.322815  |
| 3                | 8                | 0              | -0.007049               | 2.618743  | -0.757036 |
| 4                | 8                | 0              | -1.285277               | -2.288421 | -0.632366 |
| 5                | 8                | 0              | 0.876289                | -2.959096 | -0.455805 |
| 6                | 7                | 0              | -0.382148               | 0.314411  | -0.709329 |
| 7                | 7                | 0              | 0.429486                | -0.755194 | -0.390889 |
| 8                | 6                | 0              | -1.364275               | 2.799469  | -1.219483 |
| 9                | 6                | 0              | 0.390180                | 1.372670  | -0.541029 |
| 10               | 6                | 0              | 0.443908                | -4.332272 | -0.450159 |
| 11               | 6                | 0              | -0.108628               | -2.053125 | -0.505143 |
| 12               | 1                | 0              | -1.504297               | 2.278798  | -2.172427 |
| 13               | 1                | 0              | -1.468560               | 3.875893  | -1.359593 |
| 14               | 1                | 0              | -2.091888               | 2.432330  | -0.490458 |



|    |   |   |           |           |           |
|----|---|---|-----------|-----------|-----------|
| 15 | 6 | 0 | -6.270964 | 0.153705  | 0.851527  |
| 16 | 1 | 0 | -0.204649 | -4.521325 | 0.408266  |
| 17 | 1 | 0 | -0.093549 | -4.561582 | -1.373092 |
| 18 | 1 | 0 | 1.359166  | -4.918659 | -0.377657 |
| 19 | 6 | 0 | -4.312862 | -0.590041 | -1.171231 |
| 20 | 6 | 0 | -3.593253 | -0.666113 | 1.630895  |
| 21 | 1 | 0 | -6.888384 | 0.673599  | 0.112285  |
| 22 | 1 | 0 | -6.441140 | 0.619884  | 1.827152  |
| 23 | 1 | 0 | -6.577720 | -0.896844 | 0.898682  |
| 24 | 1 | 0 | -3.663753 | -0.185662 | 2.611730  |
| 25 | 1 | 0 | -2.542983 | -0.716774 | 1.331823  |
| 26 | 1 | 0 | -3.989525 | -1.684988 | 1.696979  |
| 27 | 1 | 0 | -3.248344 | -0.654022 | -1.413930 |
| 28 | 1 | 0 | -4.835897 | -0.057655 | -1.971752 |
| 29 | 1 | 0 | -4.714333 | -1.606298 | -1.091956 |
| 30 | 6 | 0 | 1.692989  | -0.361004 | -0.029066 |
| 31 | 6 | 0 | 1.717358  | 1.014786  | -0.105808 |
| 32 | 6 | 0 | 2.884771  | 1.833248  | 0.257889  |
| 33 | 6 | 0 | 2.765003  | -1.273265 | 0.497993  |
| 34 | 8 | 0 | 3.910722  | 1.374830  | 0.728960  |
| 35 | 8 | 0 | 2.691060  | 3.141979  | 0.014615  |
| 36 | 6 | 0 | 3.788469  | 3.998872  | 0.367079  |
| 37 | 8 | 0 | 2.734612  | -1.763279 | 1.602174  |
| 38 | 8 | 0 | 3.739404  | -1.430299 | -0.403330 |
| 39 | 6 | 0 | 4.897398  | -2.143852 | 0.067910  |
| 40 | 1 | 0 | 4.683082  | 3.731984  | -0.201939 |
| 41 | 1 | 0 | 4.009512  | 3.919950  | 1.434752  |
| 42 | 1 | 0 | 3.459403  | 5.007126  | 0.115750  |
| 43 | 1 | 0 | 5.570861  | -2.198213 | -0.787148 |
| 44 | 1 | 0 | 4.620300  | -3.144730 | 0.408441  |
| 45 | 1 | 0 | 5.360092  | -1.592315 | 0.889702  |

TS4a (ADEADTS3.log)

Standard orientation:

| Center Number | Atomic Number | Atomic Type | Coordinates (Angstroms) |           |           |
|---------------|---------------|-------------|-------------------------|-----------|-----------|
|               |               |             | X                       | Y         | Z         |
| 1             | 15            | 0           | -2.389765               | -0.014605 | -1.038646 |
| 2             | 8             | 0           | -1.515051               | -2.091867 | -0.009251 |
| 3             | 8             | 0           | -0.685512               | -1.411750 | 2.053858  |
| 4             | 8             | 0           | -1.450693               | 2.880990  | 1.171354  |
| 5             | 8             | 0           | 0.819182                | 2.824004  | 1.036507  |
| 6             | 7             | 0           | -1.429630               | 0.204529  | 0.358096  |
| 7             | 7             | 0           | -0.356790               | 1.110700  | 0.168167  |
| 8             | 6             | 0           | -1.830375               | -1.980767 | 2.675817  |
| 9             | 6             | 0           | -0.784514               | -1.265947 | 0.660758  |
| 10            | 6             | 0           | 0.865823                | 4.139999  | 1.611100  |
| 11            | 6             | 0           | -0.421388               | 2.328691  | 0.849523  |
| 12            | 1             | 0           | -2.684316               | -1.288362 | 2.649611  |
| 13            | 1             | 0           | -1.549728               | -2.158842 | 3.717046  |
| 14            | 1             | 0           | -2.115777               | -2.919633 | 2.193465  |
| 15            | 6             | 0           | -3.987071               | -0.780400 | -0.626629 |
| 16            | 1             | 0           | 0.358755                | 4.859316  | 0.962781  |
| 17            | 1             | 0           | 0.390622                | 4.142299  | 2.594750  |
| 18            | 1             | 0           | 1.925948                | 4.379225  | 1.695016  |
| 19            | 6             | 0           | -2.808923               | 1.699172  | -1.533980 |
| 20            | 6             | 0           | -1.643166               | -0.726854 | -2.548348 |
| 21            | 1             | 0           | -4.329685               | -0.349862 | 0.318881  |
| 22            | 1             | 0           | -3.848460               | -1.853078 | -0.504847 |
| 23            | 1             | 0           | -4.718783               | -0.555108 | -1.410017 |
| 24            | 1             | 0           | -1.500301               | -1.796418 | -2.406041 |
| 25            | 1             | 0           | -0.672871               | -0.245794 | -2.711702 |
| 26            | 1             | 0           | -2.287853               | -0.515502 | -3.408806 |
| 27            | 1             | 0           | -1.915522               | 2.202656  | -1.913647 |
| 28            | 1             | 0           | -3.175280               | 2.257368  | -0.669820 |
| 29            | 1             | 0           | -3.567377               | 1.683280  | -2.323561 |
| 30            | 6             | 0           | 0.834060                | 0.361741  | -0.045428 |
| 31            | 6             | 0           | 0.655687                | -0.950677 | 0.177711  |
| 32            | 6             | 0           | 1.652659                | -1.987102 | -0.157074 |
| 33            | 6             | 0           | 1.985404                | 1.043301  | -0.718315 |
| 34            | 8             | 0           | 2.522805                | -1.864850 | -1.002459 |
| 35            | 8             | 0           | 1.475148                | -3.102553 | 0.573757  |
| 36            | 6             | 0           | 2.376843                | -4.177373 | 0.278730  |
| 37            | 8             | 0           | 1.849314                | 1.661765  | -1.753414 |

|    |   |   |          |           |           |
|----|---|---|----------|-----------|-----------|
| 38 | 8 | 0 | 3.137253 | 0.862546  | -0.067615 |
| 39 | 6 | 0 | 4.310509 | 1.324306  | -0.758129 |
| 40 | 1 | 0 | 3.410573 | -3.879143 | 0.475332  |
| 41 | 1 | 0 | 2.288335 | -4.478025 | -0.768984 |
| 42 | 1 | 0 | 2.081015 | -4.993501 | 0.938417  |
| 43 | 1 | 0 | 5.139215 | 1.144870  | -0.073201 |
| 44 | 1 | 0 | 4.225133 | 2.387902  | -0.994396 |
| 45 | 1 | 0 | 4.444918 | 0.754027  | -1.680741 |

Int4a (ADEADTS3.for.log)

Standard orientation:

| Center Number | Atomic Number | Atomic Type | Coordinates (Angstroms) |           |           |
|---------------|---------------|-------------|-------------------------|-----------|-----------|
|               |               |             | X                       | Y         | Z         |
| 1             | 15            | 0           | -2.334531               | -1.177394 | -0.888398 |
| 2             | 8             | 0           | 0.610049                | -2.867617 | 0.066363  |
| 3             | 8             | 0           | 0.654323                | -1.811633 | 2.069532  |
| 4             | 8             | 0           | -2.901682               | 1.701464  | 0.839513  |
| 5             | 8             | 0           | -0.874391               | 2.646915  | 1.233994  |
| 6             | 7             | 0           | -1.610395               | -0.731311 | 0.502331  |
| 7             | 7             | 0           | -0.956086               | 0.525142  | 0.436678  |
| 8             | 6             | 0           | 0.170531                | -3.008650 | 2.694688  |
| 9             | 6             | 0           | 0.757129                | -1.859186 | 0.732390  |
| 10            | 6             | 0           | -1.534591               | 3.892635  | 1.502951  |
| 11            | 6             | 0           | -1.689862               | 1.644752  | 0.837634  |
| 12            | 1             | 0           | -0.872596               | -3.175129 | 2.411842  |
| 13            | 1             | 0           | 0.247408                | -2.830014 | 3.767771  |
| 14            | 1             | 0           | 0.773874                | -3.871248 | 2.400919  |
| 15            | 6             | 0           | -2.735865               | -2.930322 | -0.624733 |
| 16            | 1             | 0           | -2.036060               | 4.263367  | 0.604770  |
| 17            | 1             | 0           | -2.269355               | 3.768104  | 2.301672  |
| 18            | 1             | 0           | -0.743421               | 4.576939  | 1.810575  |
| 19            | 6             | 0           | -3.909969               | -0.341273 | -1.327648 |
| 20            | 6             | 0           | -1.303706               | -1.062509 | -2.401596 |
| 21            | 1             | 0           | -3.371188               | -3.022123 | 0.260664  |
| 22            | 1             | 0           | -1.801097               | -3.470965 | -0.454695 |
| 23            | 1             | 0           | -3.259115               | -3.345046 | -1.491374 |
| 24            | 1             | 0           | -0.441690               | -1.724758 | -2.283307 |
| 25            | 1             | 0           | -0.944053               | -0.034278 | -2.517700 |
| 26            | 1             | 0           | -1.872752               | -1.345543 | -3.293273 |
| 27            | 1             | 0           | -3.721832               | 0.717476  | -1.520589 |
| 28            | 1             | 0           | -4.593050               | -0.406414 | -0.476978 |
| 29            | 1             | 0           | -4.365547               | -0.803224 | -2.210884 |
| 30            | 6             | 0           | 0.398795                | 0.563293  | 0.131205  |
| 31            | 6             | 0           | 1.203584                | -0.534500 | 0.172039  |
| 32            | 6             | 0           | 2.551729                | -0.505167 | -0.433997 |
| 33            | 6             | 0           | 0.873248                | 1.853287  | -0.516008 |
| 34            | 8             | 0           | 2.948566                | 0.285943  | -1.272279 |
| 35            | 8             | 0           | 3.324167                | -1.502791 | 0.056653  |
| 36            | 6             | 0           | 4.639454                | -1.595275 | -0.505729 |
| 37            | 8             | 0           | 0.362237                | 2.276637  | -1.531619 |
| 38            | 8             | 0           | 1.872124                | 2.432223  | 0.152075  |
| 39            | 6             | 0           | 2.487629                | 3.544210  | -0.518634 |
| 40            | 1             | 0           | 5.214034                | -0.689515 | -0.292577 |
| 41            | 1             | 0           | 4.586437                | -1.734953 | -1.588840 |
| 42            | 1             | 0           | 5.099518                | -2.461518 | -0.029233 |
| 43            | 1             | 0           | 3.238434                | 3.922697  | 0.175207  |
| 44            | 1             | 0           | 1.747474                | 4.315151  | -0.747057 |
| 45            | 1             | 0           | 2.956118                | 3.198184  | -1.443245 |

P(CH3)3 (PMe.log)

Standard orientation:

| Center Number | Atomic Number | Atomic Type | Coordinates (Angstroms) |           |           |
|---------------|---------------|-------------|-------------------------|-----------|-----------|
|               |               |             | X                       | Y         | Z         |
| 1             | 15            | 0           | -0.000480               | -0.000397 | -0.605678 |
| 2             | 6             | 0           | -1.574478               | -0.475113 | 0.281019  |
| 3             | 6             | 0           | 1.199518                | -1.124826 | 0.280574  |
| 4             | 6             | 0           | 0.375637                | 1.600431  | 0.280396  |
| 5             | 1             | 0           | -1.871110               | -1.487270 | -0.014768 |

|    |   |   |           |           |           |
|----|---|---|-----------|-----------|-----------|
| 6  | 1 | 0 | -2.380866 | 0.205360  | -0.013252 |
| 7  | 1 | 0 | -1.470797 | -0.444990 | 1.373085  |
| 8  | 1 | 0 | -0.356901 | 2.361487  | -0.009547 |
| 9  | 1 | 0 | 1.365234  | 1.962192  | -0.019102 |
| 10 | 1 | 0 | 0.356875  | 1.493305  | 1.372310  |
| 11 | 1 | 0 | 2.223932  | -0.874793 | -0.016161 |
| 12 | 1 | 0 | 1.014480  | -2.164077 | -0.011814 |
| 13 | 1 | 0 | 1.122285  | -1.048210 | 1.372480  |

-----

2b (DEAD2.log)

Standard orientation:

| Center Number | Atomic Number | Atomic Type | Coordinates (Angstroms) |           |           |
|---------------|---------------|-------------|-------------------------|-----------|-----------|
|               |               |             | X                       | Y         | Z         |
| 1             | 8             | 0           | -2.157073               | 1.576093  | 0.073248  |
| 2             | 8             | 0           | -2.392909               | -0.679306 | -0.134343 |
| 3             | 8             | 0           | 2.157088                | -1.576091 | -0.073246 |
| 4             | 8             | 0           | 2.392903                | 0.679309  | 0.134341  |
| 5             | 7             | 0           | -0.330835               | 0.253401  | -0.462981 |
| 6             | 7             | 0           | 0.330831                | -0.253409 | 0.462954  |
| 7             | 6             | 0           | -3.814628               | -0.559217 | 0.087392  |
| 8             | 6             | 0           | -1.719005               | 0.469118  | -0.109659 |
| 9             | 6             | 0           | 3.814624                | 0.559224  | -0.087366 |
| 10            | 6             | 0           | 1.719002                | -0.469125 | 0.109650  |
| 11            | 1             | 0           | -4.006937               | -0.184119 | 1.095259  |
| 12            | 1             | 0           | -4.208985               | -1.567689 | -0.031472 |
| 13            | 1             | 0           | -4.254923               | 0.121324  | -0.645135 |
| 14            | 1             | 0           | 4.254914                | -0.121316 | 0.645166  |
| 15            | 1             | 0           | 4.006956                | 0.184129  | -1.095229 |
| 16            | 1             | 0           | 4.208979                | 1.567696  | 0.031506  |

-----

9 (AM.log)

Standard orientation:

| Center Number | Atomic Number | Atomic Type | Coordinates (Angstroms) |           |           |
|---------------|---------------|-------------|-------------------------|-----------|-----------|
|               |               |             | X                       | Y         | Z         |
| 1             | 6             | 0           | -0.602331               | 0.192487  | 0.060967  |
| 2             | 6             | 0           | 0.602340                | 0.192534  | -0.060923 |
| 3             | 6             | 0           | 2.035030                | 0.249064  | -0.278917 |
| 4             | 6             | 0           | -2.035021               | 0.248904  | 0.279039  |
| 5             | 8             | 0           | 2.562516                | 0.977301  | -1.091259 |
| 6             | 8             | 0           | 2.679136                | -0.606623 | 0.533369  |
| 7             | 6             | 0           | 4.113091                | -0.619669 | 0.389136  |
| 8             | 8             | 0           | -2.562493               | 0.976750  | 1.091735  |
| 9             | 8             | 0           | -2.679151               | -0.606386 | -0.533639 |
| 10            | 6             | 0           | -4.113109               | -0.619437 | -0.389427 |
| 11            | 1             | 0           | 4.526721                | 0.367054  | 0.611813  |
| 12            | 1             | 0           | 4.390737                | -0.904888 | -0.628608 |
| 13            | 1             | 0           | 4.466107                | -1.358323 | 1.108203  |
| 14            | 1             | 0           | -4.466211               | -1.357168 | -1.109398 |
| 15            | 1             | 0           | -4.526641               | 0.367602  | -0.610861 |
| 16            | 1             | 0           | -4.390778               | -0.905904 | 0.627961  |

-----

1m (MeEster.log)

Standard orientation:

| Center Number | Atomic Number | Atomic Type | Coordinates (Angstroms) |           |           |
|---------------|---------------|-------------|-------------------------|-----------|-----------|
|               |               |             | X                       | Y         | Z         |
| 1             | 6             | 0           | -0.444426               | -1.021849 | -0.030744 |
| 2             | 6             | 0           | 0.525801                | -0.102555 | 0.086213  |
| 3             | 6             | 0           | 0.270522                | 1.363590  | 0.352894  |
| 4             | 6             | 0           | 1.977847                | -0.453258 | 0.016832  |
| 5             | 6             | 0           | -1.886024               | -0.670959 | 0.014478  |
| 6             | 8             | 0           | 0.269413                | 1.836347  | 1.464284  |
| 7             | 8             | 0           | 2.861928                | 0.377304  | 0.044882  |
| 8             | 8             | 0           | 0.108548                | 2.043965  | -0.788388 |
| 9             | 8             | 0           | 2.191125                | -1.779360 | -0.091576 |
| 10            | 6             | 0           | 3.572668                | -2.171315 | -0.176040 |

|    |   |   |           |           |           |
|----|---|---|-----------|-----------|-----------|
| 11 | 1 | 0 | 4.114390  | -1.850693 | 0.717308  |
| 12 | 1 | 0 | 4.041983  | -1.727005 | -1.057530 |
| 13 | 1 | 0 | 3.561335  | -3.258625 | -0.251492 |
| 14 | 6 | 0 | -0.156047 | 3.449878  | -0.625203 |
| 15 | 1 | 0 | 0.656839  | 3.929324  | -0.074509 |
| 16 | 1 | 0 | -1.095909 | 3.590997  | -0.085829 |
| 17 | 1 | 0 | -0.227526 | 3.850355  | -1.636454 |
| 18 | 8 | 0 | -2.341205 | 0.448276  | 0.139708  |
| 19 | 8 | 0 | -2.641535 | -1.783611 | -0.104757 |
| 20 | 6 | 0 | -4.062073 | -1.566209 | -0.068443 |
| 21 | 1 | 0 | -4.511094 | -2.554553 | -0.166797 |
| 22 | 1 | 0 | -4.370106 | -0.917843 | -0.893037 |
| 23 | 1 | 0 | -4.352672 | -1.101266 | 0.877238  |
| 24 | 1 | 0 | -0.193054 | -2.067990 | -0.162045 |

A (3dMeR.log)

Standard orientation:

| Center Number | Atomic Number | Atomic Type | Coordinates (Angstroms) |           |           |
|---------------|---------------|-------------|-------------------------|-----------|-----------|
|               |               |             | X                       | Y         | Z         |
| 1             | 15            | 0           | -0.838768               | -1.417299 | -0.041872 |
| 2             | 8             | 0           | -2.378169               | 0.851665  | 0.462747  |
| 3             | 8             | 0           | -0.862672               | 2.381300  | -0.269765 |
| 4             | 8             | 0           | 1.694088                | -0.289839 | 1.018330  |
| 5             | 8             | 0           | 3.024512                | 0.686681  | -0.551736 |
| 6             | 7             | 0           | -0.411557               | 0.168667  | -0.473767 |
| 7             | 7             | 0           | 0.862495                | 0.475933  | -1.036555 |
| 8             | 6             | 0           | -1.768295               | 3.418243  | 0.138017  |
| 9             | 6             | 0           | -1.296081               | 1.140991  | -0.048774 |
| 10            | 6             | 0           | 4.115322                | 0.433083  | 0.326103  |
| 11            | 6             | 0           | 1.805049                | 0.262392  | -0.097621 |
| 12            | 1             | 0           | -2.713615               | 3.342049  | -0.405880 |
| 13            | 1             | 0           | -1.259880               | 4.350849  | -0.106881 |
| 14            | 1             | 0           | -1.966068               | 3.358450  | 1.211470  |
| 15            | 6             | 0           | -2.393940               | -1.911707 | -0.863316 |
| 16            | 1             | 0           | 3.973848                | 0.923127  | 1.294870  |
| 17            | 1             | 0           | 4.252147                | -0.640114 | 0.502090  |
| 18            | 1             | 0           | 4.996030                | 0.841909  | -0.174975 |
| 19            | 6             | 0           | 0.459169                | -2.490406 | -0.708380 |
| 20            | 6             | 0           | -1.019116               | -1.704515 | 1.746024  |
| 21            | 1             | 0           | -2.269990               | -1.817123 | -1.946142 |
| 22            | 1             | 0           | -3.199309               | -1.255438 | -0.531792 |
| 23            | 1             | 0           | -2.631264               | -2.952251 | -0.617281 |
| 24            | 1             | 0           | -1.853309               | -1.107027 | 2.118480  |
| 25            | 1             | 0           | -0.084125               | -1.381375 | 2.208796  |
| 26            | 1             | 0           | -1.202318               | -2.767348 | 1.937669  |
| 27            | 1             | 0           | 1.341085                | -2.402214 | -0.072331 |
| 28            | 1             | 0           | 0.710942                | -2.150595 | -1.715781 |
| 29            | 1             | 0           | 0.096054                | -3.522532 | -0.730898 |

B (AMPMe.log)

Standard orientation:

| Center Number | Atomic Number | Atomic Type | Coordinates (Angstroms) |           |           |
|---------------|---------------|-------------|-------------------------|-----------|-----------|
|               |               |             | X                       | Y         | Z         |
| 1             | 15            | 0           | 2.054493                | -0.567247 | 0.046766  |
| 2             | 8             | 0           | 1.089313                | 2.148199  | 0.096193  |
| 3             | 8             | 0           | -1.135171               | 1.777000  | -0.050968 |
| 4             | 8             | 0           | -2.532463               | -0.945491 | -1.467301 |
| 5             | 8             | 0           | -2.678030               | -1.072374 | 0.804726  |
| 6             | 6             | 0           | 0.310163                | -0.098983 | -0.051076 |
| 7             | 6             | 0           | -0.563418               | -1.118291 | -0.178275 |
| 8             | 6             | 0           | -1.342296               | 3.196452  | -0.022156 |
| 9             | 6             | 0           | 0.139960                | 1.370910  | 0.004951  |
| 10            | 6             | 0           | -4.098974               | -1.114985 | 0.653569  |
| 11            | 6             | 0           | -1.982179               | -0.986715 | -0.374606 |
| 12            | 1             | 0           | -0.961069               | 3.622909  | 0.909902  |
| 13            | 1             | 0           | -2.421458               | 3.332641  | -0.093641 |
| 14            | 1             | 0           | -0.838155               | 3.676141  | -0.865459 |
| 15            | 6             | 0           | 2.158351                | -2.381893 | -0.017316 |
| 16            | 1             | 0           | -4.475201               | -0.202749 | 0.179725  |

|    |   |   |           |           |           |
|----|---|---|-----------|-----------|-----------|
| 17 | 1 | 0 | -4.406717 | -1.972091 | 0.046330  |
| 18 | 1 | 0 | -4.500096 | -1.205944 | 1.665318  |
| 19 | 6 | 0 | 3.069324  | 0.073747  | -1.335438 |
| 20 | 6 | 0 | 2.883261  | -0.038833 | 1.591395  |
| 21 | 1 | 0 | 1.688901  | -2.734774 | -0.937575 |
| 22 | 1 | 0 | 1.594376  | -2.804697 | 0.816500  |
| 23 | 1 | 0 | 3.205870  | -2.697757 | 0.028191  |
| 24 | 1 | 0 | 2.356250  | -0.472881 | 2.446343  |
| 25 | 1 | 0 | 2.832984  | 1.050079  | 1.655411  |
| 26 | 1 | 0 | 3.927652  | -0.366344 | 1.607189  |
| 27 | 1 | 0 | 3.020593  | 1.164549  | -1.322537 |
| 28 | 1 | 0 | 2.654905  | -0.291915 | -2.279632 |
| 29 | 1 | 0 | 4.109422  | -0.255584 | -1.245055 |

C (MeEsterPMe.log)

Standard orientation:

| Center Number | Atomic Number | Atomic Type | Coordinates (Angstroms) |           |           |
|---------------|---------------|-------------|-------------------------|-----------|-----------|
|               |               |             | X                       | Y         | Z         |
| 1             | 6             | 0           | 0.644307                | -0.245423 | -0.621708 |
| 2             | 6             | 0           | -0.768955               | -0.002804 | -0.190426 |
| 3             | 6             | 0           | -0.947587               | 1.040811  | 0.767688  |
| 4             | 6             | 0           | -1.723880               | -0.874290 | -0.812288 |
| 5             | 6             | 0           | 1.530858                | 0.963630  | -0.890579 |
| 6             | 8             | 0           | 0.004704                | 1.652865  | 1.289062  |
| 7             | 8             | 0           | -1.409111               | -1.823904 | -1.551245 |
| 8             | 8             | 0           | -2.231238               | 1.346563  | 1.105320  |
| 9             | 8             | 0           | -3.033509               | -0.619564 | -0.534663 |
| 10            | 6             | 0           | -3.964423               | -1.508697 | -1.149859 |
| 11            | 1             | 0           | -3.793548               | -2.544381 | -0.838026 |
| 12            | 1             | 0           | -3.896935               | -1.462967 | -2.241299 |
| 13            | 1             | 0           | -4.949329               | -1.172670 | -0.818577 |
| 14            | 6             | 0           | -2.370746               | 2.393316  | 2.064649  |
| 15            | 1             | 0           | -1.928825               | 3.326778  | 1.702636  |
| 16            | 1             | 0           | -1.892076               | 2.132194  | 3.014490  |
| 17            | 1             | 0           | -3.446608               | 2.515065  | 2.206966  |
| 18            | 8             | 0           | 2.709278                | 1.016364  | -0.572142 |
| 19            | 8             | 0           | 0.907483                | 1.905379  | -1.595943 |
| 20            | 6             | 0           | 1.670029                | 3.097948  | -1.846348 |
| 21            | 1             | 0           | 1.014466                | 3.741889  | -2.432545 |
| 22            | 1             | 0           | 2.581845                | 2.864783  | -2.402448 |
| 23            | 1             | 0           | 1.932880                | 3.575256  | -0.899181 |
| 24            | 1             | 0           | 0.590470                | -0.846063 | -1.542281 |
| 25            | 15            | 0           | 1.566798                | -1.351928 | 0.562135  |
| 26            | 6             | 0           | 0.415353                | -2.686252 | 1.027174  |
| 27            | 6             | 0           | 3.019296                | -2.154984 | -0.209809 |
| 28            | 6             | 0           | 2.102918                | -0.509219 | 2.084077  |
| 29            | 1             | 0           | -0.097031               | -3.039792 | 0.127685  |
| 30            | 1             | 0           | -0.338225               | -2.289048 | 1.710949  |
| 31            | 1             | 0           | 0.960399                | -3.501938 | 1.511802  |
| 32            | 1             | 0           | 3.714913                | -1.377676 | -0.532438 |
| 33            | 1             | 0           | 2.695001                | -2.737011 | -1.078084 |
| 34            | 1             | 0           | 3.512916                | -2.823545 | 0.502987  |
| 35            | 1             | 0           | 1.284353                | 0.131513  | 2.422506  |
| 36            | 1             | 0           | 2.956136                | 0.129460  | 1.849497  |
| 37            | 1             | 0           | 2.373356                | -1.248764 | 2.844788  |

trans-12

(transpyr.log)

Standard orientation:

| Center Number | Atomic Number | Atomic Type | Coordinates (Angstroms) |          |           |
|---------------|---------------|-------------|-------------------------|----------|-----------|
|               |               |             | X                       | Y        | Z         |
| 1             | 8             | 0           | -3.389537               | 0.201532 | -0.719560 |
| 2             | 8             | 0           | 0.154174                | 3.800904 | -0.048836 |
| 3             | 8             | 0           | 1.694642                | 2.270989 | 0.667388  |
| 4             | 7             | 0           | -1.607049               | 1.664464 | -0.424908 |
| 5             | 7             | 0           | -0.277374               | 1.534289 | -0.044818 |
| 6             | 6             | 0           | -4.222175               | 1.323487 | -1.101876 |
| 7             | 6             | 0           | -2.124536               | 0.494525 | -0.408015 |
| 8             | 6             | 0           | 2.631617                | 3.346898 | 0.878110  |

|    |   |   |           |           |           |
|----|---|---|-----------|-----------|-----------|
| 9  | 6 | 0 | 0.485689  | 2.655750  | 0.167269  |
| 10 | 1 | 0 | -4.233211 | 2.044947  | -0.277732 |
| 11 | 6 | 0 | -5.603096 | 0.779970  | -1.410955 |
| 12 | 1 | 0 | -3.765060 | 1.815568  | -1.967189 |
| 13 | 1 | 0 | 2.795694  | 3.865411  | -0.071788 |
| 14 | 1 | 0 | 2.194738  | 4.066437  | 1.577835  |
| 15 | 6 | 0 | 3.910280  | 2.734296  | 1.418516  |
| 16 | 6 | 0 | 0.114938  | 0.155005  | 0.265119  |
| 17 | 6 | 0 | -1.191606 | -0.638272 | -0.007920 |
| 18 | 6 | 0 | -1.703799 | -1.387767 | 1.219784  |
| 19 | 1 | 0 | -1.101079 | -1.349689 | -0.834907 |
| 20 | 6 | 0 | 1.255765  | -0.342156 | -0.631539 |
| 21 | 8 | 0 | -1.488184 | -1.065565 | 2.366381  |
| 22 | 8 | 0 | -2.445919 | -2.445572 | 0.851802  |
| 23 | 6 | 0 | -3.039752 | -3.188580 | 1.932769  |
| 24 | 8 | 0 | 1.558896  | 0.147183  | -1.694697 |
| 25 | 8 | 0 | 1.800178  | -1.429733 | -0.059093 |
| 26 | 6 | 0 | 2.895232  | -2.186936 | -0.706323 |
| 27 | 1 | 0 | 0.404426  | 0.053935  | 1.313671  |
| 28 | 1 | 0 | -3.718534 | -2.550566 | 2.504254  |
| 29 | 1 | 0 | -2.265148 | -3.575639 | 2.599412  |
| 30 | 1 | 0 | -3.585633 | -4.004298 | 1.458966  |
| 31 | 6 | 0 | 3.168772  | -3.302834 | 0.303874  |
| 32 | 6 | 0 | 4.120041  | -1.282013 | -0.869764 |
| 33 | 6 | 0 | 2.410660  | -2.761383 | -2.040914 |
| 34 | 1 | 0 | 2.275061  | -3.917159 | 0.453774  |
| 35 | 1 | 0 | 3.465670  | -2.884642 | 1.270873  |
| 36 | 1 | 0 | 3.975920  | -3.948346 | -0.058090 |
| 37 | 1 | 0 | 4.400145  | -0.843752 | 0.094328  |
| 38 | 1 | 0 | 3.925544  | -0.477547 | -1.580902 |
| 39 | 1 | 0 | 4.966836  | -1.875263 | -1.232792 |
| 40 | 1 | 0 | 2.196608  | -1.968729 | -2.759779 |
| 41 | 1 | 0 | 1.506473  | -3.362449 | -1.892710 |
| 42 | 1 | 0 | 3.184473  | -3.414181 | -2.460025 |
| 43 | 1 | 0 | -6.035830 | 0.288543  | -0.533684 |
| 44 | 1 | 0 | -5.563798 | 0.055025  | -2.230201 |
| 45 | 1 | 0 | -6.264300 | 1.601110  | -1.707756 |
| 46 | 1 | 0 | 4.332719  | 2.019512  | 0.704645  |
| 47 | 1 | 0 | 3.725371  | 2.212251  | 2.363144  |
| 48 | 1 | 0 | 4.651700  | 3.520417  | 1.598830  |

cis-12 (cispyp.log)

Standard orientation:

| Center<br>Number | Atomic<br>Number | Atomic<br>Type | Coordinates (Angstroms) |           |           |
|------------------|------------------|----------------|-------------------------|-----------|-----------|
|                  |                  |                | X                       | Y         | Z         |
| 1                | 8                | 0              | -3.367490               | -0.782718 | 0.017523  |
| 2                | 8                | 0              | 0.724509                | -3.786888 | 0.425174  |
| 3                | 8                | 0              | 2.078608                | -2.239950 | -0.572270 |
| 4                | 7                | 0              | -1.390985               | -2.005465 | 0.072822  |
| 5                | 7                | 0              | -0.095050               | -1.792002 | -0.401387 |
| 6                | 6                | 0              | -4.027355               | -1.841968 | 0.752975  |
| 7                | 6                | 0              | -2.070567               | -0.965561 | -0.233510 |
| 8                | 6                | 0              | 3.208681                | -3.098210 | -0.315108 |
| 9                | 6                | 0              | 0.887266                | -2.711978 | -0.106550 |
| 10               | 1                | 0              | -3.955499               | -2.766505 | 0.169671  |
| 11               | 6                | 0              | -5.463654               | -1.412610 | 0.977565  |
| 12               | 1                | 0              | -3.487311               | -1.998036 | 1.692737  |
| 13               | 1                | 0              | 3.300277                | -3.248309 | 0.765214  |
| 14               | 1                | 0              | 3.023906                | -4.075670 | -0.771850 |
| 15               | 6                | 0              | 4.434506                | -2.421084 | -0.899249 |
| 16               | 6                | 0              | 0.142573                | -0.395769 | -0.783602 |
| 17               | 6                | 0              | -1.319098               | 0.102081  | -1.009754 |
| 18               | 6                | 0              | -1.639116               | 1.514767  | -0.542645 |
| 19               | 1                | 0              | -1.578343               | 0.021891  | -2.070877 |
| 20               | 6                | 0              | 0.930541                | 0.361630  | 0.311132  |
| 21               | 8                | 0              | -1.583003               | 1.891691  | 0.606156  |
| 22               | 8                | 0              | -2.019926               | 2.286013  | -1.577632 |
| 23               | 6                | 0              | -2.376735               | 3.638409  | -1.239749 |
| 24               | 8                | 0              | 1.135707                | -0.067414 | 1.420752  |
| 25               | 8                | 0              | 1.372542                | 1.518684  | -0.206293 |
| 26               | 6                | 0              | 2.195550                | 2.462862  | 0.587527  |
| 27               | 1                | 0              | 0.722936                | -0.338066 | -1.704971 |

|    |   |   |           |           |           |
|----|---|---|-----------|-----------|-----------|
| 28 | 1 | 0 | -1.510837 | 4.170585  | -0.836998 |
| 29 | 1 | 0 | -3.179086 | 3.646785  | -0.498116 |
| 30 | 1 | 0 | -2.706736 | 4.094262  | -2.173177 |
| 31 | 6 | 0 | 2.405900  | 3.619721  | -0.391353 |
| 32 | 6 | 0 | 3.527528  | 1.793270  | 0.939133  |
| 33 | 6 | 0 | 1.428754  | 2.925047  | 1.829834  |
| 34 | 1 | 0 | 1.447743  | 4.070099  | -0.671008 |
| 35 | 1 | 0 | 2.902806  | 3.271977  | -1.302899 |
| 36 | 1 | 0 | 3.029024  | 4.393026  | 0.069777  |
| 37 | 1 | 0 | 4.028621  | 1.436583  | 0.032363  |
| 38 | 1 | 0 | 3.375971  | 0.950734  | 1.616204  |
| 39 | 1 | 0 | 4.185118  | 2.520905  | 1.427866  |
| 40 | 1 | 0 | 1.297664  | 2.108562  | 2.541220  |
| 41 | 1 | 0 | 0.440164  | 3.301699  | 1.552696  |
| 42 | 1 | 0 | 1.987673  | 3.731977  | 2.317743  |
| 43 | 1 | 0 | -5.978987 | -1.253133 | 0.024875  |
| 44 | 1 | 0 | -5.507080 | -0.484322 | 1.555882  |
| 45 | 1 | 0 | -5.998021 | -2.191025 | 1.532656  |
| 46 | 1 | 0 | 4.602639  | -1.445671 | -0.430918 |
| 47 | 1 | 0 | 4.323574  | -2.272170 | -1.978466 |
| 48 | 1 | 0 | 5.319806  | -3.042897 | -0.726837 |

---

maenaka/budexarr\_h  
 exp13 std1h

1H NMR (CDCl3, 400 MHz)  
 3a

| PARAMETER | VALUE      |
|-----------|------------|
| DATE_     | Jul 9 2012 |
| TIME_     | 19:56      |
| SOLVENT   | CDCl3      |
| EXPNO     | 20         |
| PROCNO    | 0          |
| PROCPRG   | nmr        |
| PROCVER   | 3.744      |
| FTRES     | 44928      |
| FTSCN     | 6000.6     |
| FTWID     | 1.0        |
| DELTA     | 1.0        |
| TEMP      | 300        |
| NUC1      | 13C        |
| NUC2      | 1H         |
| NUC3      | 1H         |
| NUC4      | 1H         |
| NUC5      | 1H         |
| NUC6      | 1H         |
| NUC7      | 1H         |
| NUC8      | 1H         |
| NUC9      | 1H         |
| NUC10     | 1H         |
| NUC11     | 1H         |
| NUC12     | 1H         |
| NUC13     | 1H         |
| NUC14     | 1H         |
| NUC15     | 1H         |
| NUC16     | 1H         |
| NUC17     | 1H         |
| NUC18     | 1H         |
| NUC19     | 1H         |
| NUC20     | 1H         |
| NUC21     | 1H         |
| NUC22     | 1H         |
| NUC23     | 1H         |
| NUC24     | 1H         |
| NUC25     | 1H         |
| NUC26     | 1H         |
| NUC27     | 1H         |
| NUC28     | 1H         |
| NUC29     | 1H         |
| NUC30     | 1H         |
| NUC31     | 1H         |
| NUC32     | 1H         |
| NUC33     | 1H         |
| NUC34     | 1H         |
| NUC35     | 1H         |
| NUC36     | 1H         |
| NUC37     | 1H         |
| NUC38     | 1H         |
| NUC39     | 1H         |
| NUC40     | 1H         |
| NUC41     | 1H         |
| NUC42     | 1H         |
| NUC43     | 1H         |
| NUC44     | 1H         |
| NUC45     | 1H         |
| NUC46     | 1H         |
| NUC47     | 1H         |
| NUC48     | 1H         |
| NUC49     | 1H         |
| NUC50     | 1H         |
| NUC51     | 1H         |
| NUC52     | 1H         |
| NUC53     | 1H         |
| NUC54     | 1H         |
| NUC55     | 1H         |
| NUC56     | 1H         |
| NUC57     | 1H         |
| NUC58     | 1H         |
| NUC59     | 1H         |
| NUC60     | 1H         |
| NUC61     | 1H         |
| NUC62     | 1H         |
| NUC63     | 1H         |
| NUC64     | 1H         |
| NUC65     | 1H         |
| NUC66     | 1H         |
| NUC67     | 1H         |
| NUC68     | 1H         |
| NUC69     | 1H         |
| NUC70     | 1H         |
| NUC71     | 1H         |
| NUC72     | 1H         |
| NUC73     | 1H         |
| NUC74     | 1H         |
| NUC75     | 1H         |
| NUC76     | 1H         |
| NUC77     | 1H         |
| NUC78     | 1H         |
| NUC79     | 1H         |
| NUC80     | 1H         |
| NUC81     | 1H         |
| NUC82     | 1H         |
| NUC83     | 1H         |
| NUC84     | 1H         |
| NUC85     | 1H         |
| NUC86     | 1H         |
| NUC87     | 1H         |
| NUC88     | 1H         |
| NUC89     | 1H         |
| NUC90     | 1H         |
| NUC91     | 1H         |
| NUC92     | 1H         |
| NUC93     | 1H         |
| NUC94     | 1H         |
| NUC95     | 1H         |
| NUC96     | 1H         |
| NUC97     | 1H         |
| NUC98     | 1H         |
| NUC99     | 1H         |
| NUC100    | 1H         |

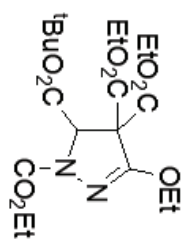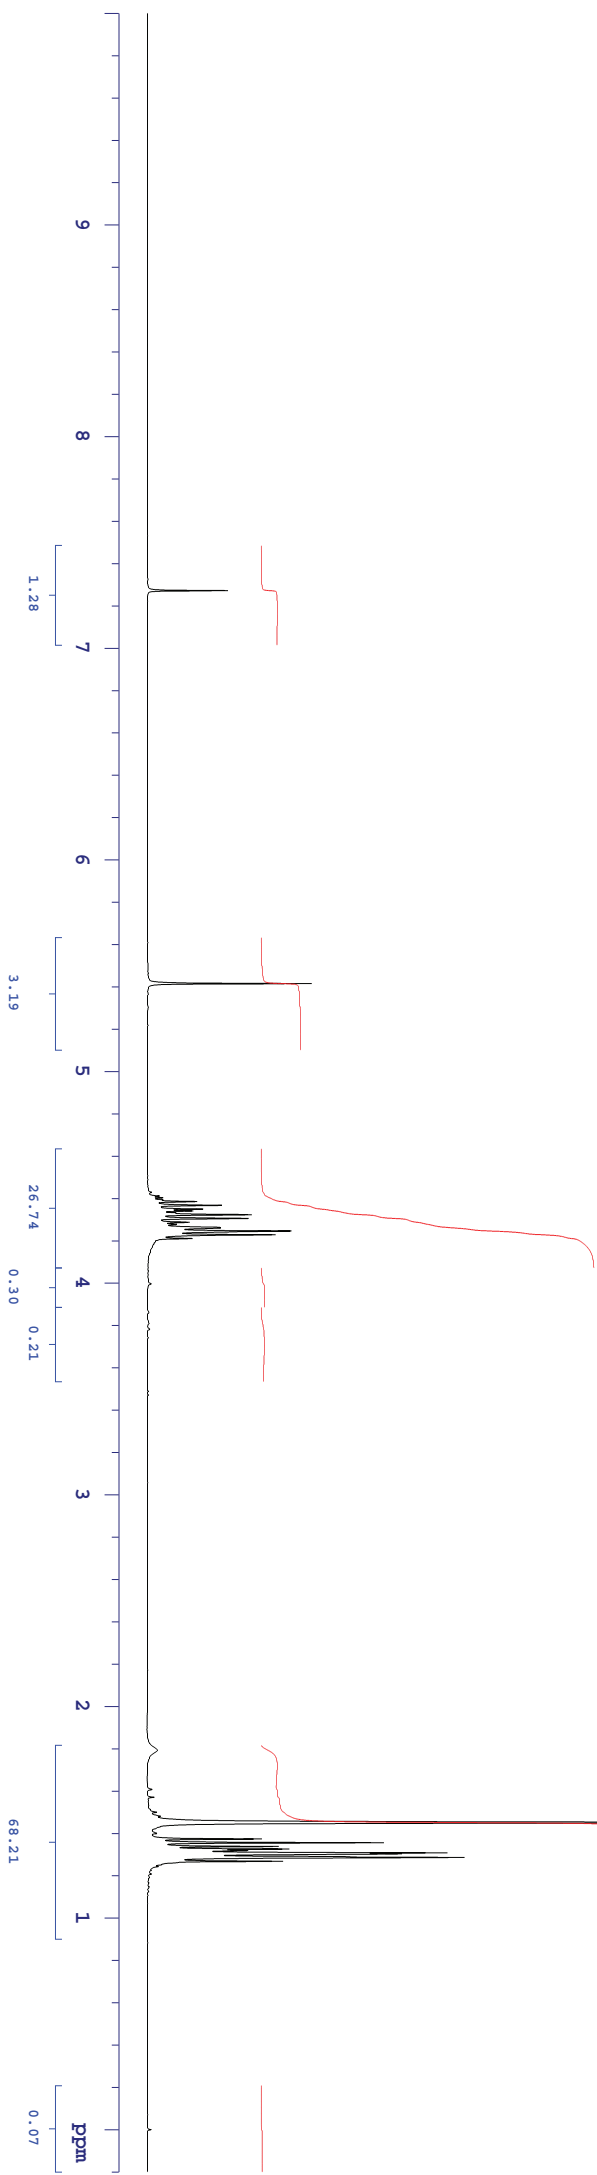



maenaka/buendadr  
 exp20 std13c

SAMPLE DEC. & VT  
 date May 9 2011 dfreq 399.956  
 solvent CDCl3 dn H1  
 file /export/home/~ dpwr 41  
 vnmr1/vnmrsys/data- dof 0  
 /maenaka/buendadr - dm yyy  
 c.fid dm w

ACQUISITION  
 freq 100.579 dmf 10400  
 tn C13 dres 9arp1 1.0  
 at 1.199 homo n  
 np 59968 PROCESSING 1.00  
 sw 25000.0 lb  
 fb not used wfile  
 bs 16 proc ft  
 cpwr 56 fn not used  
 pw 5.0 math f  
 dl 0.801  
 tof 1000.0 weir react  
 nt 4096 wekp procp1ot  
 ct 4096 wbs  
 alock n wnt  
 gain not used

FLAGS  
 f1 n  
 f2 n  
 dp y  
 hs m

DISPLAY  
 sp -1992.0  
 wp 24999.2  
 vs 214  
 sc 0  
 wc 380  
 hzmm 1.70  
 fs 500.00  
 rfi 9746.6  
 rfp 7753.8  
 th 20  
 fns 500.000  
 nm no ph

13C NMR (CDCl3, 100.6 MHz)  
 3a

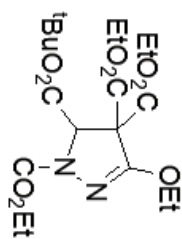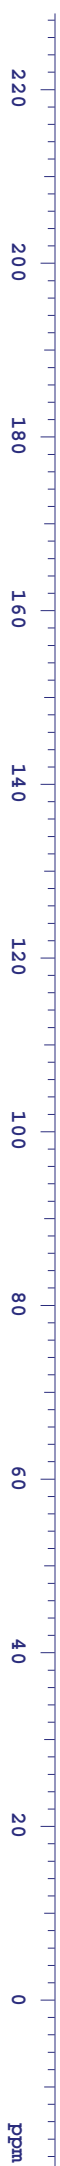

maenaka/ETDEAD  
 exp20 std1h

SAMPLE DEC. & VT  
 date Jul 11 2011 dfrq 399.956  
 solvent CDCl3 dn H1  
 file /export/home/~ dpwr 20  
 vnmr1/vnmr1s/data- dof 0  
 /maenaka/ETDEAD h.- dm mm  
 f1d dm  
 ACQUISITION  
 sfrq 399.956 dmf 200  
 tn H1 dres 1.0  
 at 3.744 homo n  
 np 4928 wtfile PROCESSING  
 sw 6000.6 not used proc ft  
 fb not used fn not used f  
 bs 1 match  
 epwr 61 match  
 pw 5.5  
 dl 1.256 werr react  
 tof 600.0 weap preoplot  
 nt 16 wbs  
 ct 16 wnt  
 alock n  
 gain not used  
 FLAGS  
 l1 n  
 ln n  
 dp y  
 hs mn  
 DISPLAY  
 sp -80.0  
 wp 4079.4  
 vs 214  
 sc 0  
 wc 380  
 hzmm 10.74  
 ls 1216.86  
 rfl 378.7  
 rfp 0  
 th 20  
 lns 100.000  
 nm ph

<sup>1</sup>H NMR (CDCl<sub>3</sub>, 400 MHz)  
 3b

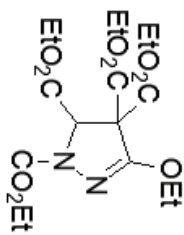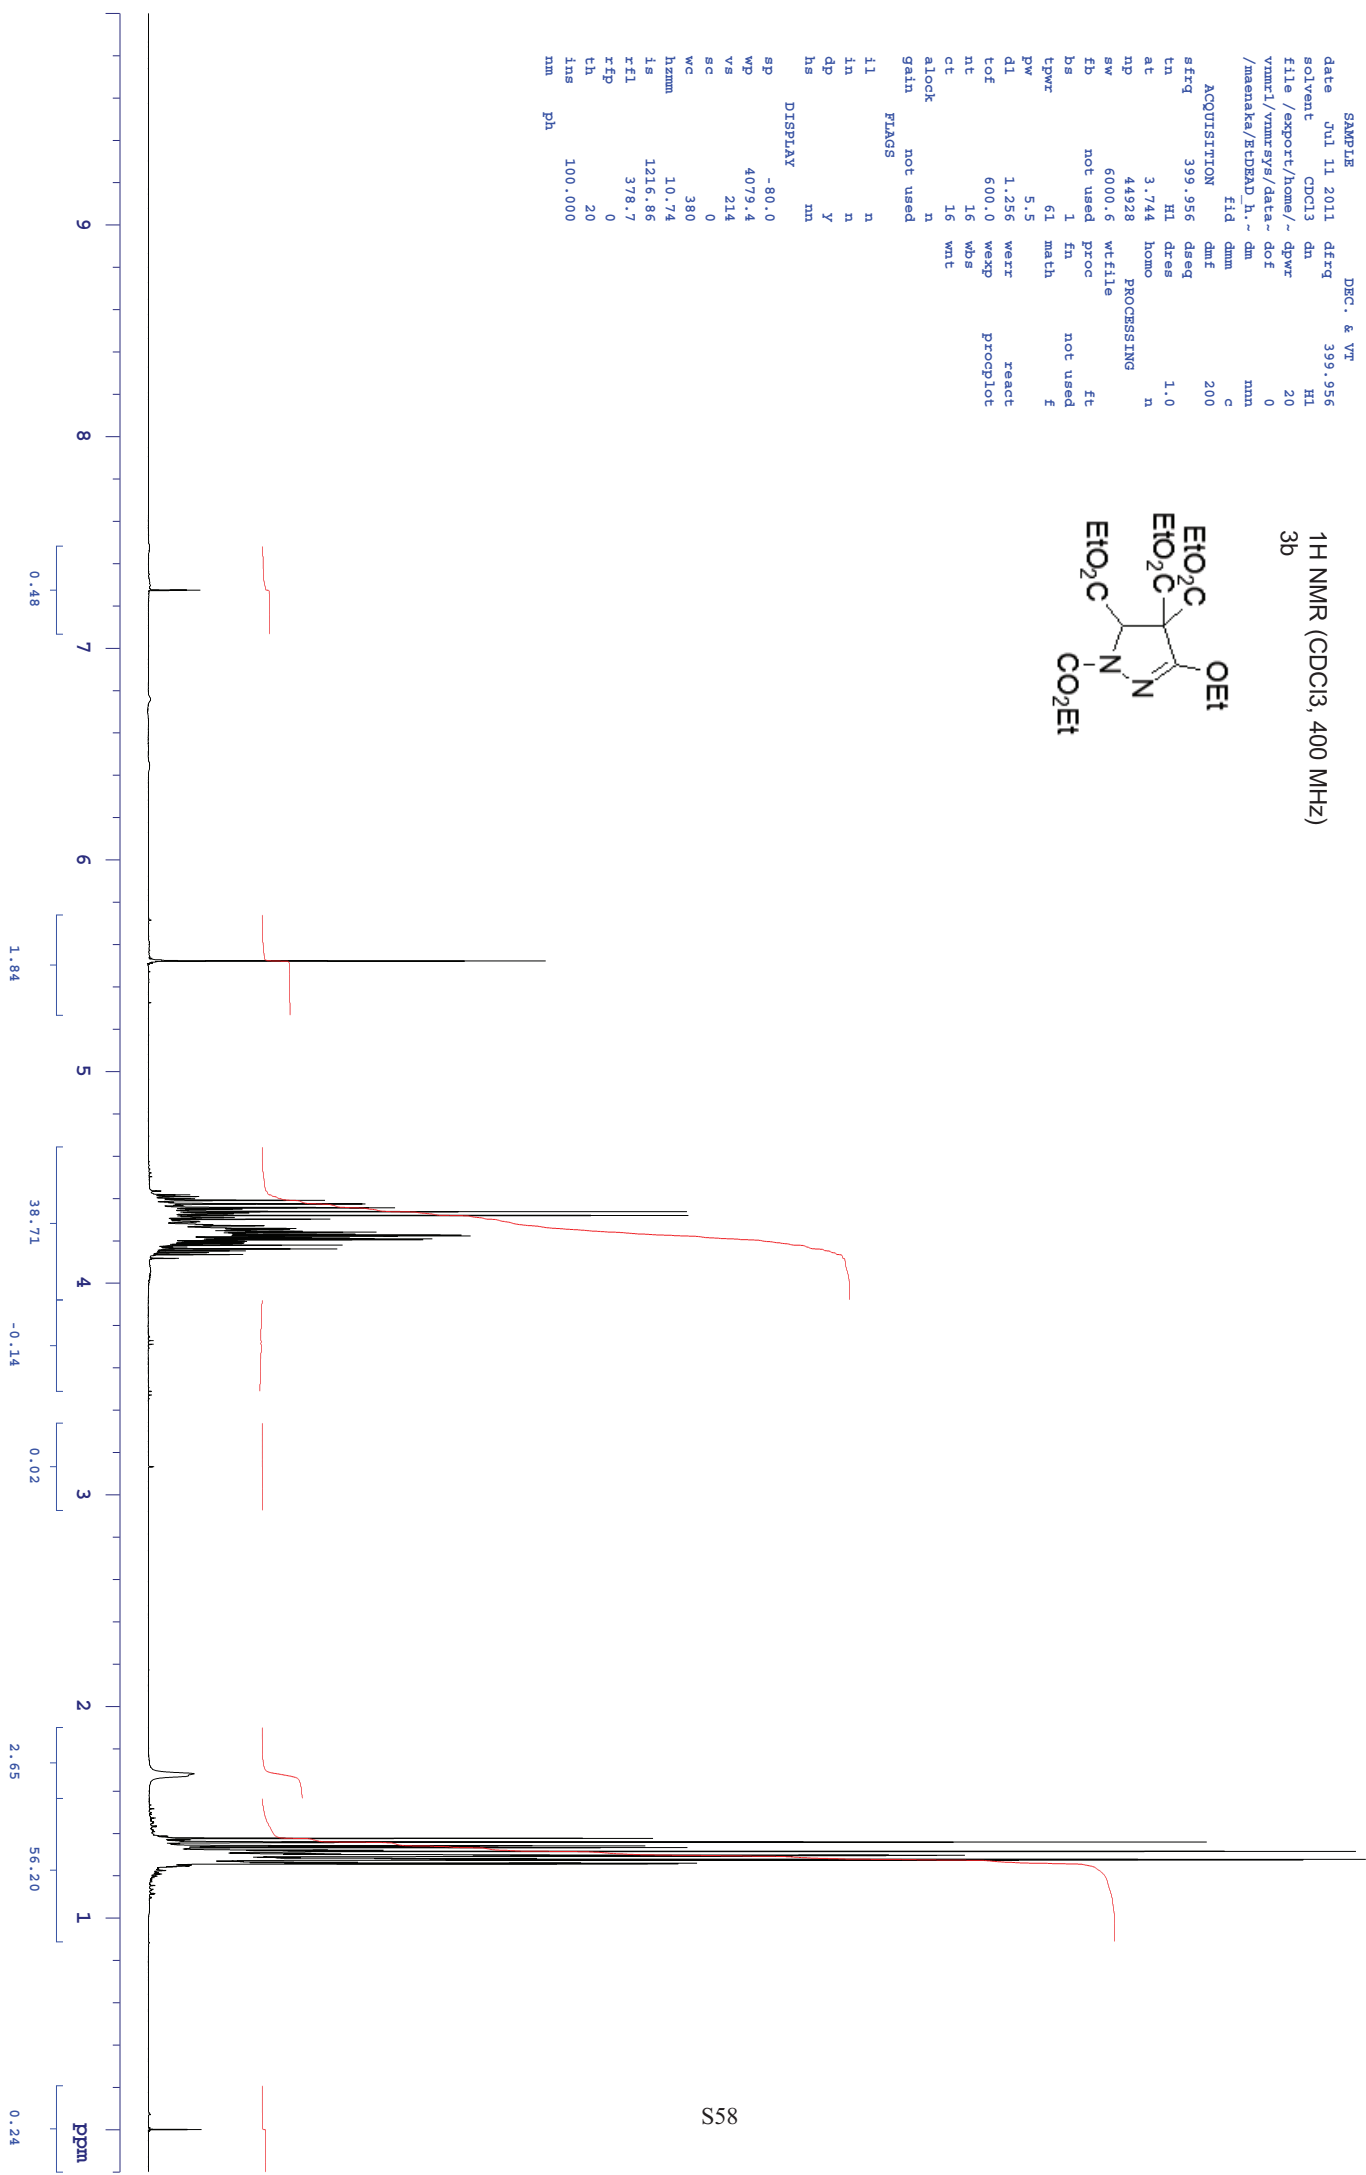

maenaka/ELDEAD  
 exp20 std13c

SAMPLE DEC. & VT  
 date Jul 11 2011 dfreq 399.956  
 solvent CDCl3 dn H1  
 file /export/home/~ dpwr 41  
 vnmr1/vnmrsys/data- dof 0  
 /maenaka/ELDEAD c.- dm YYY  
 w

ACQUISITION  
 freq 100.579 dmf 10400  
 tn C13 dres 9arp1  
 at 1.199 homo 1.0  
 np 59968 PROCESSING  
 sw 25000.0 lb 1.00  
 fb not used wfile  
 bs 16 proc ft  
 cpwr 56 fn not used  
 pw 5.0 math f  
 dl 0.801  
 tof 1000.0 weir react  
 nt 4096 wexp procp1ot  
 ct 4096 wbs  
 alock n wnt  
 gain not used

FLAGS  
 f1 n  
 f2 n  
 dp Y  
 hs mn

DISPLAY  
 sp -1992.7  
 wp 24999.2  
 vs 214  
 sc 0  
 wc 380  
 hzmm 0.59  
 fs 500.00  
 rfi 9747.3  
 rfp 7753.8  
 th 14  
 fns 500.000  
 nm no ph

<sup>13</sup>C NMR (CDCl<sub>3</sub>, 100.6 MHz)  
 3b

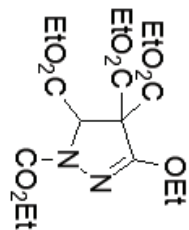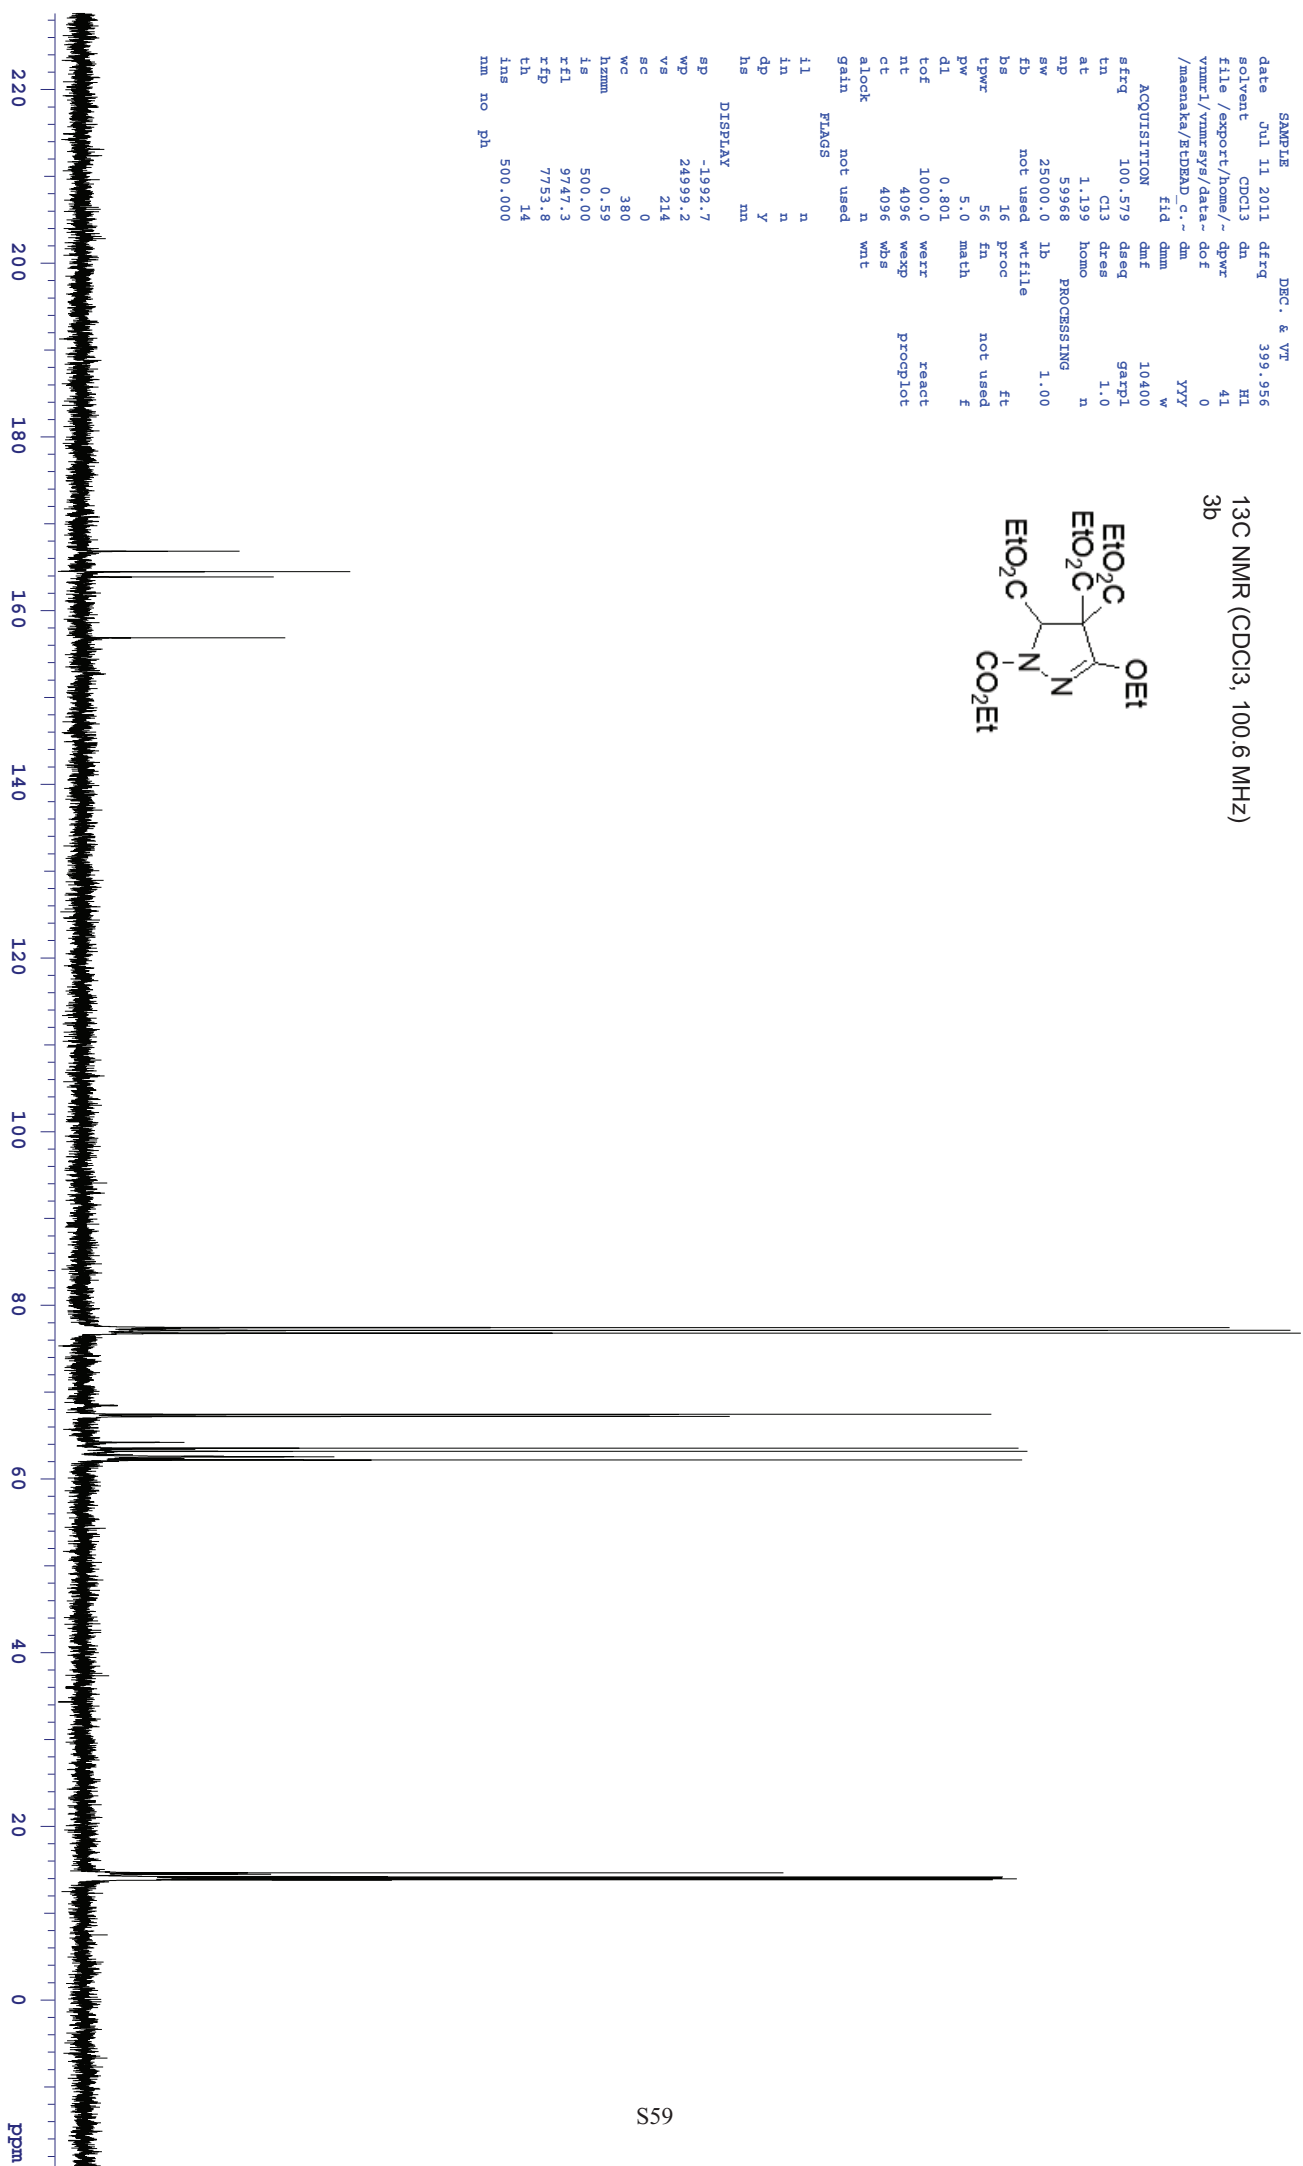

azam/1prdeadr  
 exp20 std1h

SAMPLE DEC. & VT  
 date Jul 20 2011 dfrq 399.956  
 solvent CDCl3 dn H1  
 file /export/home/~ dpwr 20  
 vnmr1/vnmrsys/data- dof 0  
 /azam/1prdeadr\_h.f- dm mm  
 c

ACQUISITION  
 sfrq 399.956 dmf 200  
 tn H1 dres 1.0  
 at 3.744 homo n  
 np 44928 wtfile PROCESSING  
 sw 6000.6  
 fb not used proc ft  
 bs 1 fn not used f  
 tpwr 61 match  
 pw 5.5  
 dl 1.256 werr react  
 tof 600.0 wearp wft  
 nt 16 wbs  
 ct 16 wnt  
 alock n  
 gain not used

FLAGS  
 l1 n  
 ln n  
 dp Y  
 hs mn  
 DISPLAY  
 sp -80.0  
 wp 4079.4  
 vs 214  
 ac 0  
 wc 380  
 hzmm 10.74  
 ls 714.44  
 rfl 370.3  
 rfp 0  
 th 3  
 lns 100.000  
 nm  
 ph

<sup>1</sup>H NMR (CDCl<sub>3</sub>, 400 MHz)  
 3c

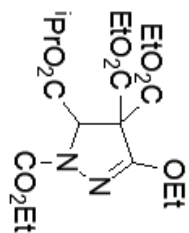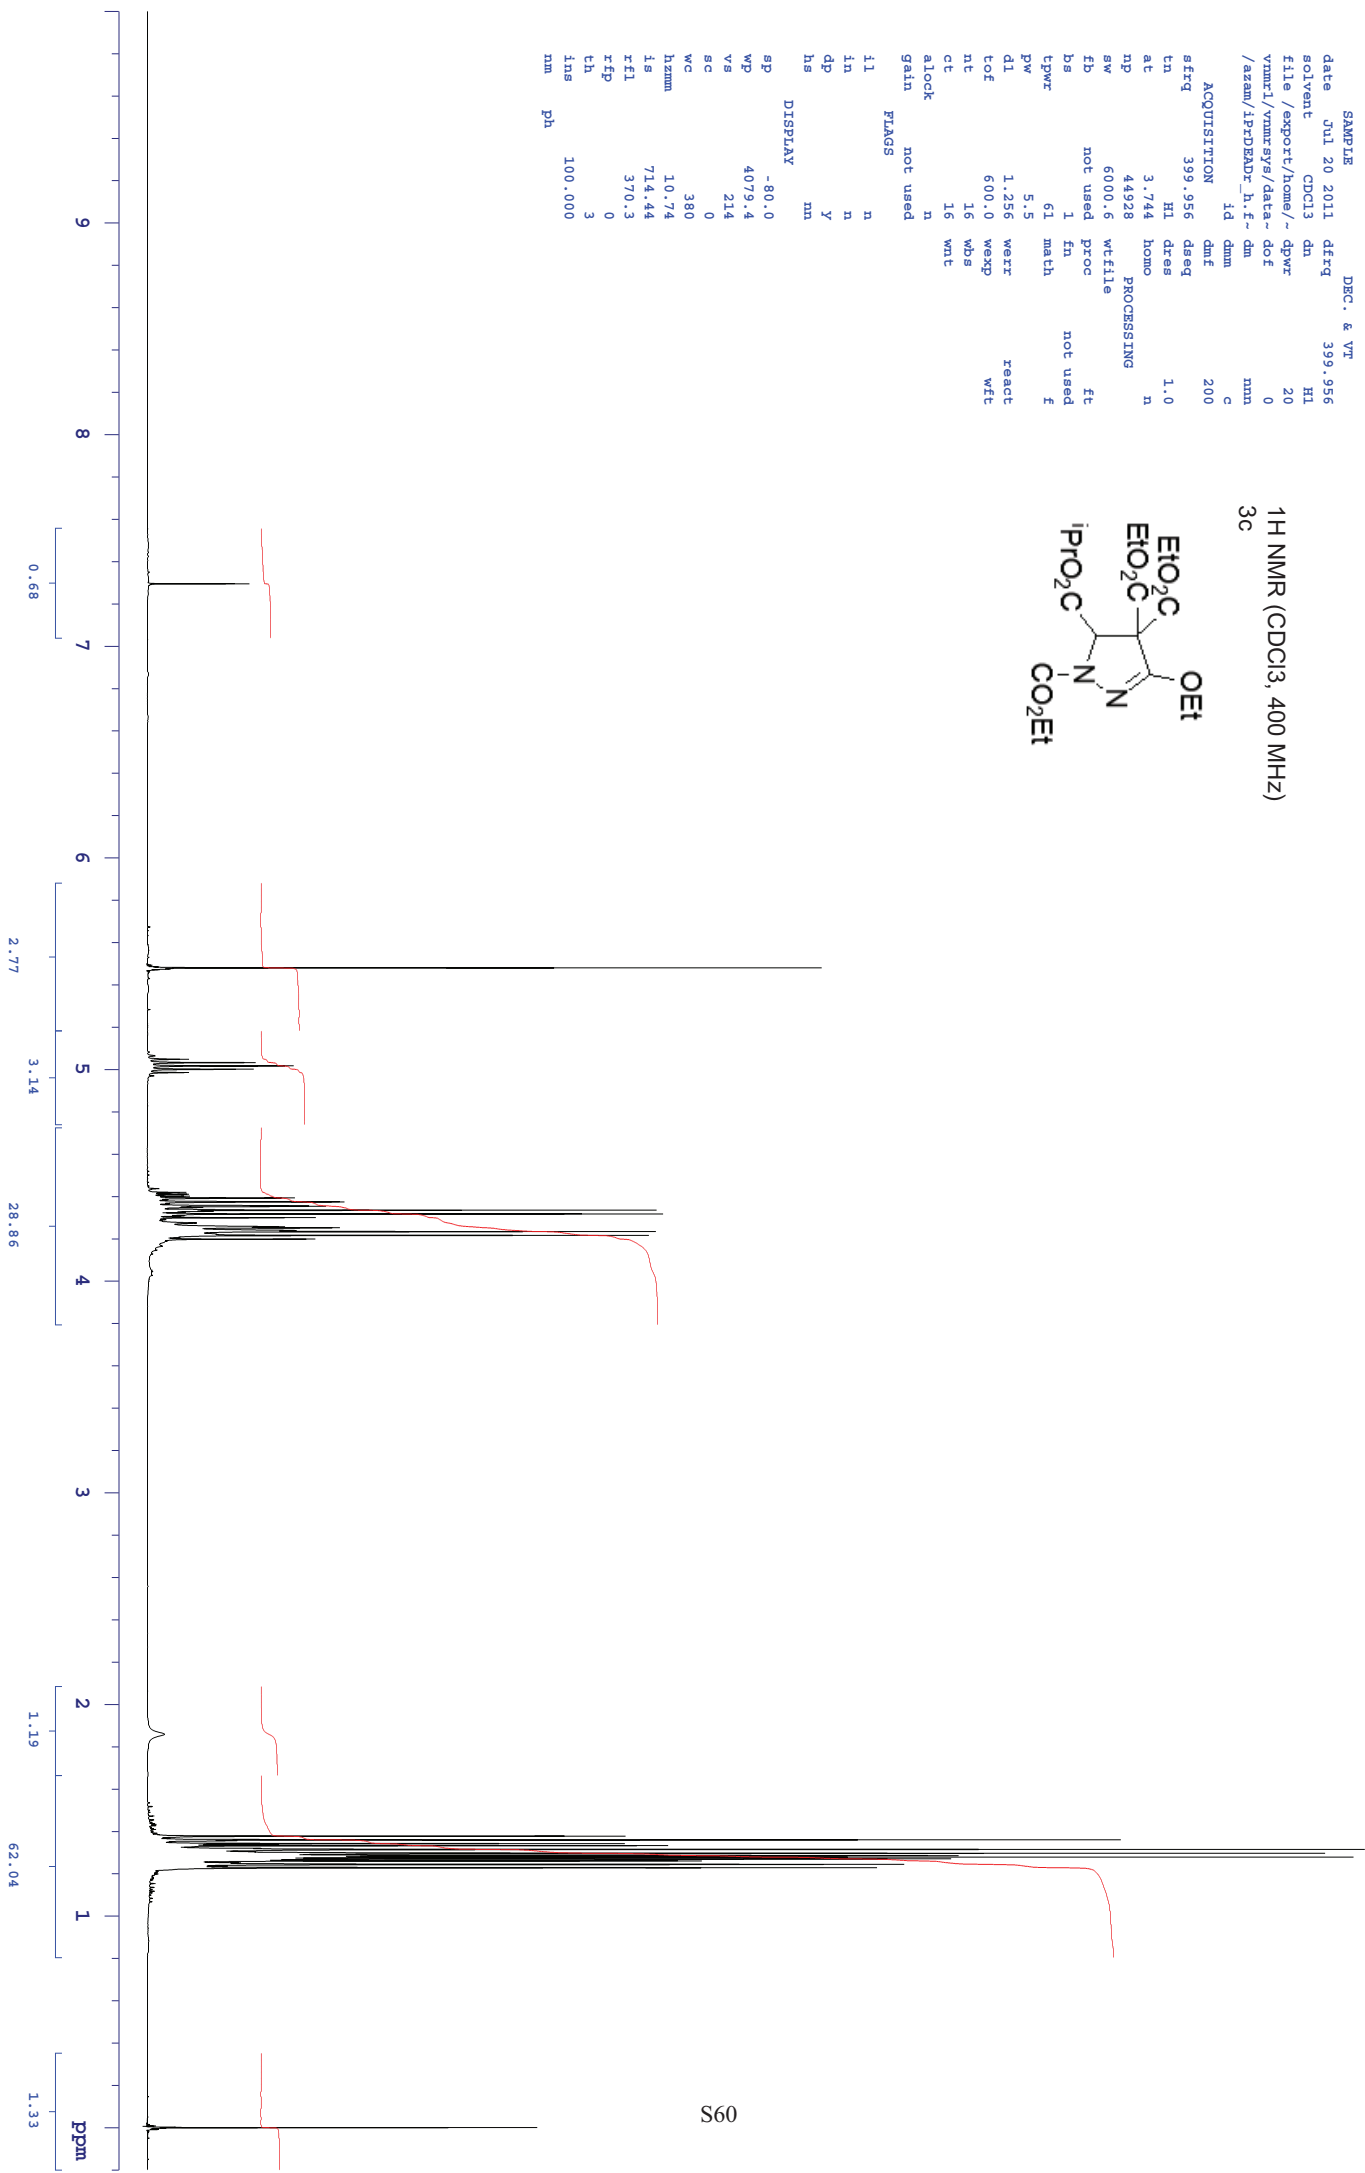

azam/1PRDEADR  
 exp20 sfd13c

SAMPLE DEC. & VT  
 date Jul 20 2011 dfrq 399.956  
 solvent CDCl3 dn H1  
 file /export/home/~ dpwr 41  
 vnmr1/vnmrsys/data- dof 0  
 /azam/1PRDEADR\_c.f- dm  
 yyy YYY w

13C NMR (CDCl3, 100.6 MHz)  
 3c

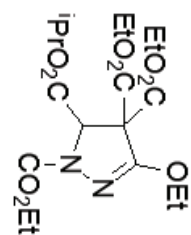

ACQUISITION  
 sfrq 100.579 dmf 10400  
 tn C13 dres 9arp1 1.0  
 at 1.199 homo n  
 np 59968 PROCESSING 1.00  
 sw 25000.0 lb  
 fb not used wfile  
 bs 16 proc ft  
 cpwr 56 fn not used  
 pw 5.0 math f  
 dl 0.801  
 tof 1000.0 weir react  
 nt 4096 wexp procp1ot  
 ct 2553 wbs  
 alock n wnt  
 gain not used  
 FLAGS  
 f1 n  
 f2 n  
 dp Y  
 hs m  
 DISPLAY  
 sp -1997.3  
 wp 24999.2  
 vs 214  
 wc 0  
 sc 380  
 hzmm 0.38  
 fs 500.00  
 rfi 9751.9  
 rfp 7753.8  
 th 20  
 fns 500.000  
 nm no ph

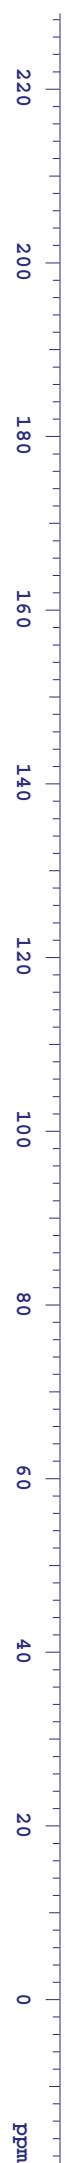

azam/DEADBnr  
 exp20 std1h

SAMPLE DEC. & VT  
 date Jul 12 2011 dfreq 399.956  
 solvent CDCl3 dn H1  
 file /export/home/~ dpwr 20  
 vnmr1/vnmrsys/data- dof 0  
 /azam/DEADBnr\_h.f1 - dm mmn  
 c

ACQUISITION  
 srfreq 399.956 dmf 200  
 tn H1 dres 1.0  
 at 3.744 homo n  
 np 44928 wfile PROCESSING  
 sw 6000.6  
 fb not used proc ft  
 bs 1 fn not used f  
 tpwr 61 match  
 pw 5.5  
 dl 1.256 werr react  
 tcf 600.0 weap procploc  
 nt 16 wbs  
 ct 16 wnt  
 alock n  
 gain not used

FLAGS  
 l1 n  
 lln n  
 dp Y  
 hs mn  
 DISPLAY

SP -80.0  
 WP 4079.4  
 VS 214  
 ac 0  
 wc 380  
 hzmm 10.74  
 ls 1665.76  
 rfl 382.7  
 rfp 0  
 th 20  
 lns 100.000  
 nm ph

<sup>1</sup>H NMR (CDCl<sub>3</sub>, 400 MHz)  
 3d

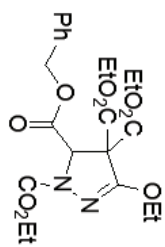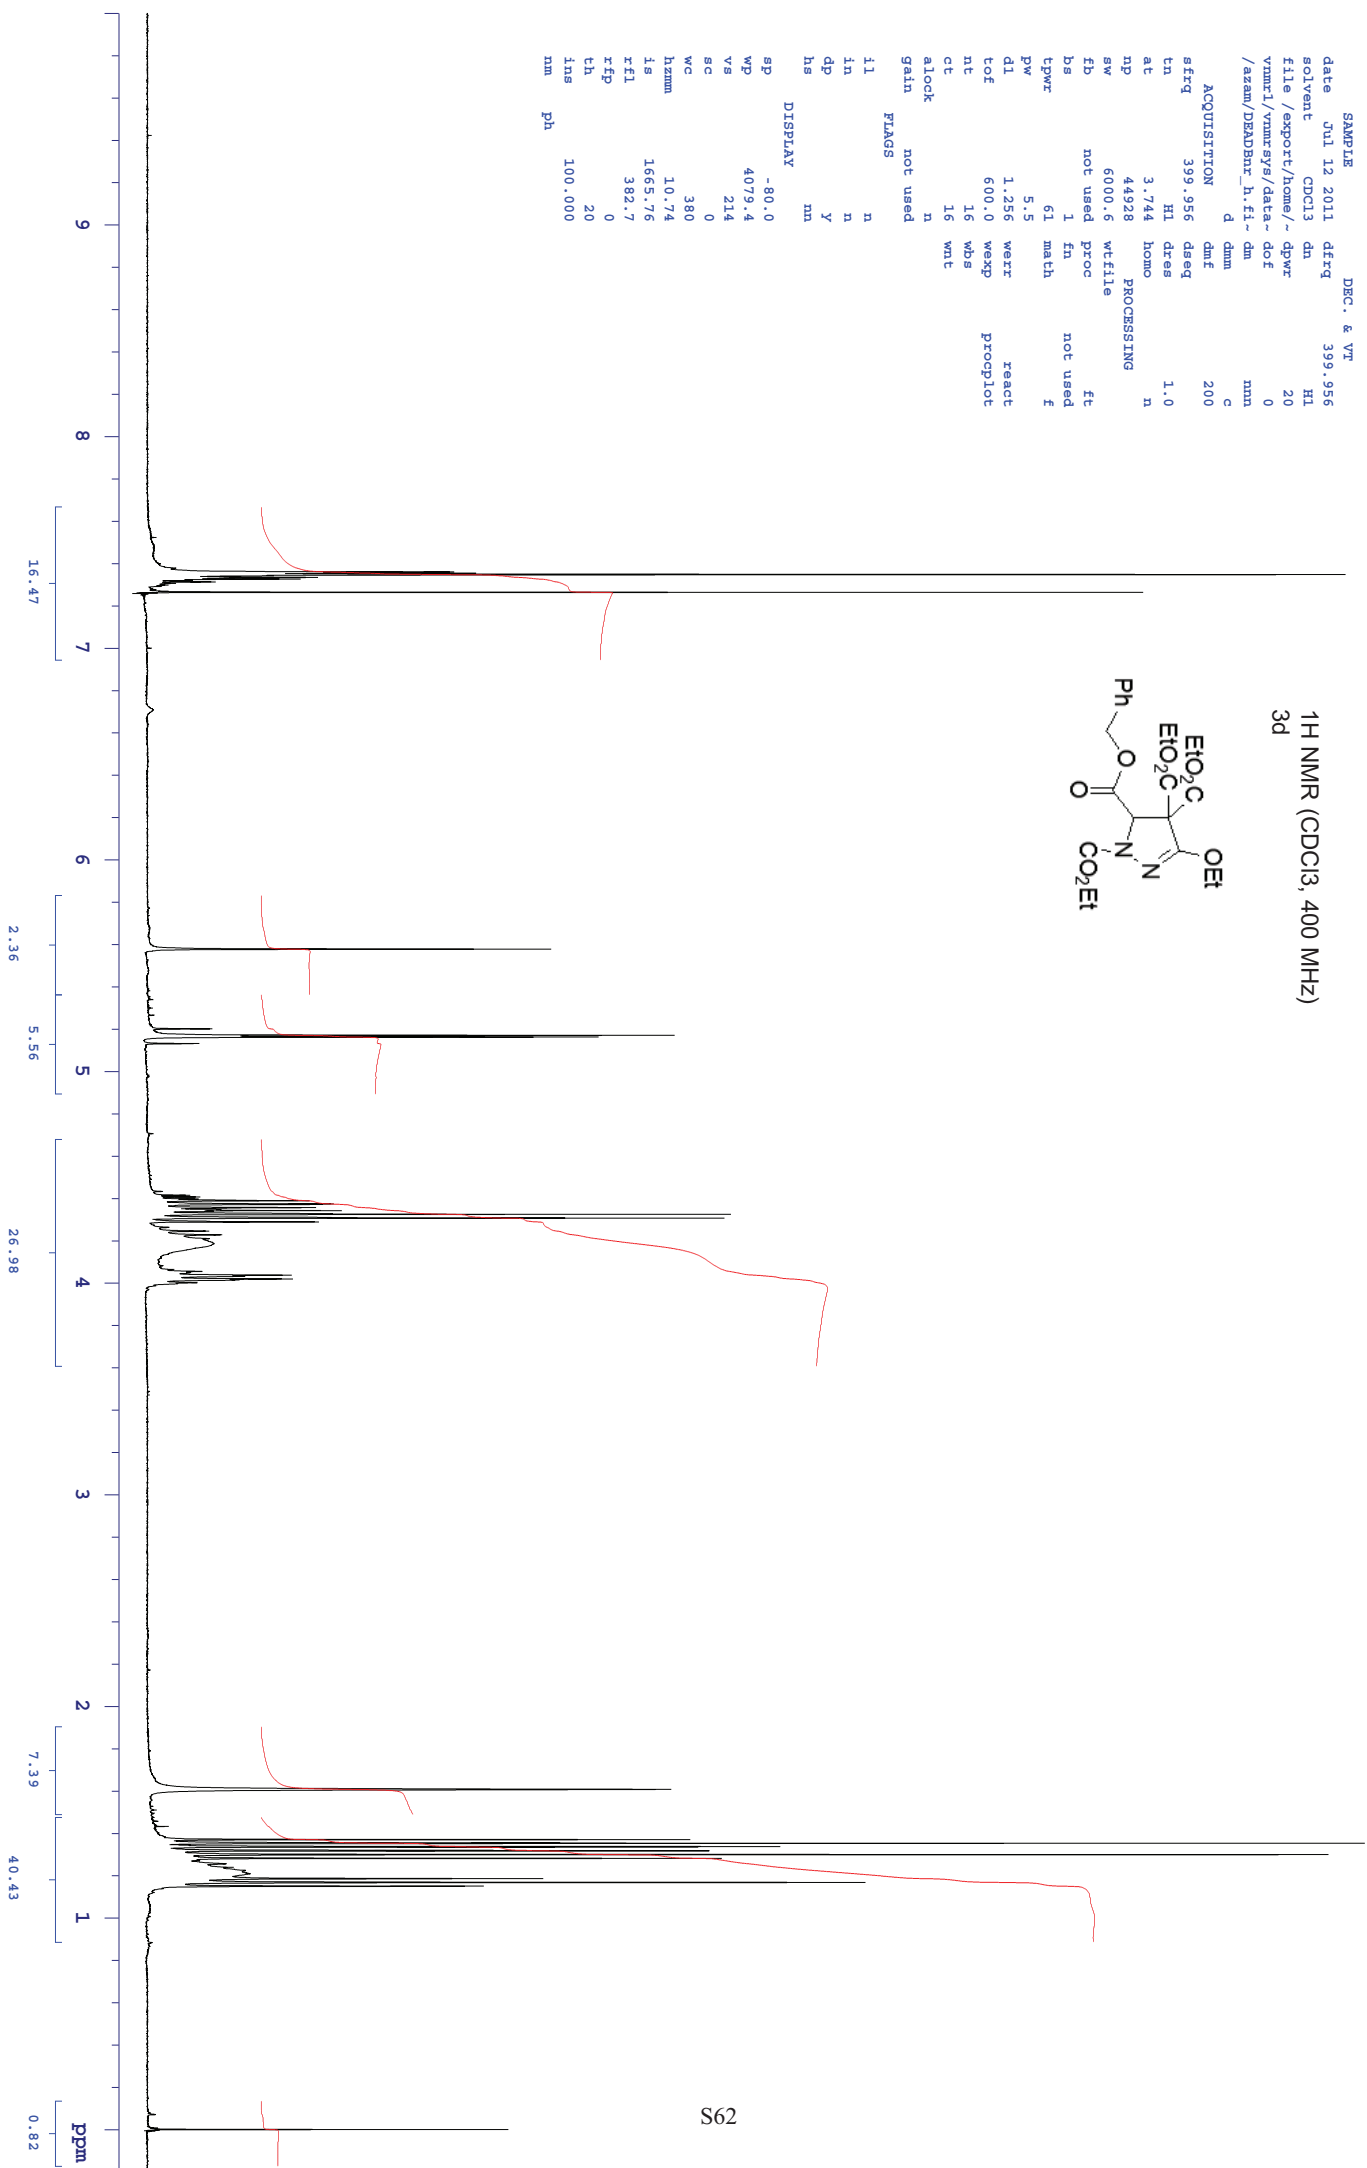

azam/DEADBnr  
 exp20 std13c

SAMPLE DEC. & VT  
 date Jul 12 2011 dfirq 399.956  
 solvent CDCl3 dn H1  
 file /export/home/~ dpwr 41  
 vnmr1/vnmr1s/data- dof 0  
 /azam/DEADBnr\_c.f1- dm YYY

ACQUISITION  
 strq 100.579 dmf 10400  
 tn C13 dseq 9arp1 1.0  
 at 1.199 homo n  
 np 59968 PROCESSING 1.00  
 sw 25000.0 lb  
 fb not used wfile  
 bs 16 proc ft  
 cpwr 56 fn not used  
 pw 5.0 math f  
 dl 0.801  
 tof 1000.0 weir react  
 nt 6000 wexp proplot  
 ct 6000 wbs  
 alock n wat  
 gain not used

FLAGS  
 f1 n  
 f2 n  
 dp Y  
 hs m

DISPLAY  
 sp -1992.7  
 wp 24999.2  
 vs 635  
 wc 0  
 hzmm 380  
 fs 0.45  
 fs 500.00  
 rfi 9747.3  
 rfp 7753.8  
 th 11  
 fns 500.000  
 nm no ph

13C NMR (CDCl3, 100.6 MHz)  
 3d

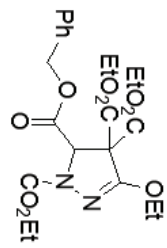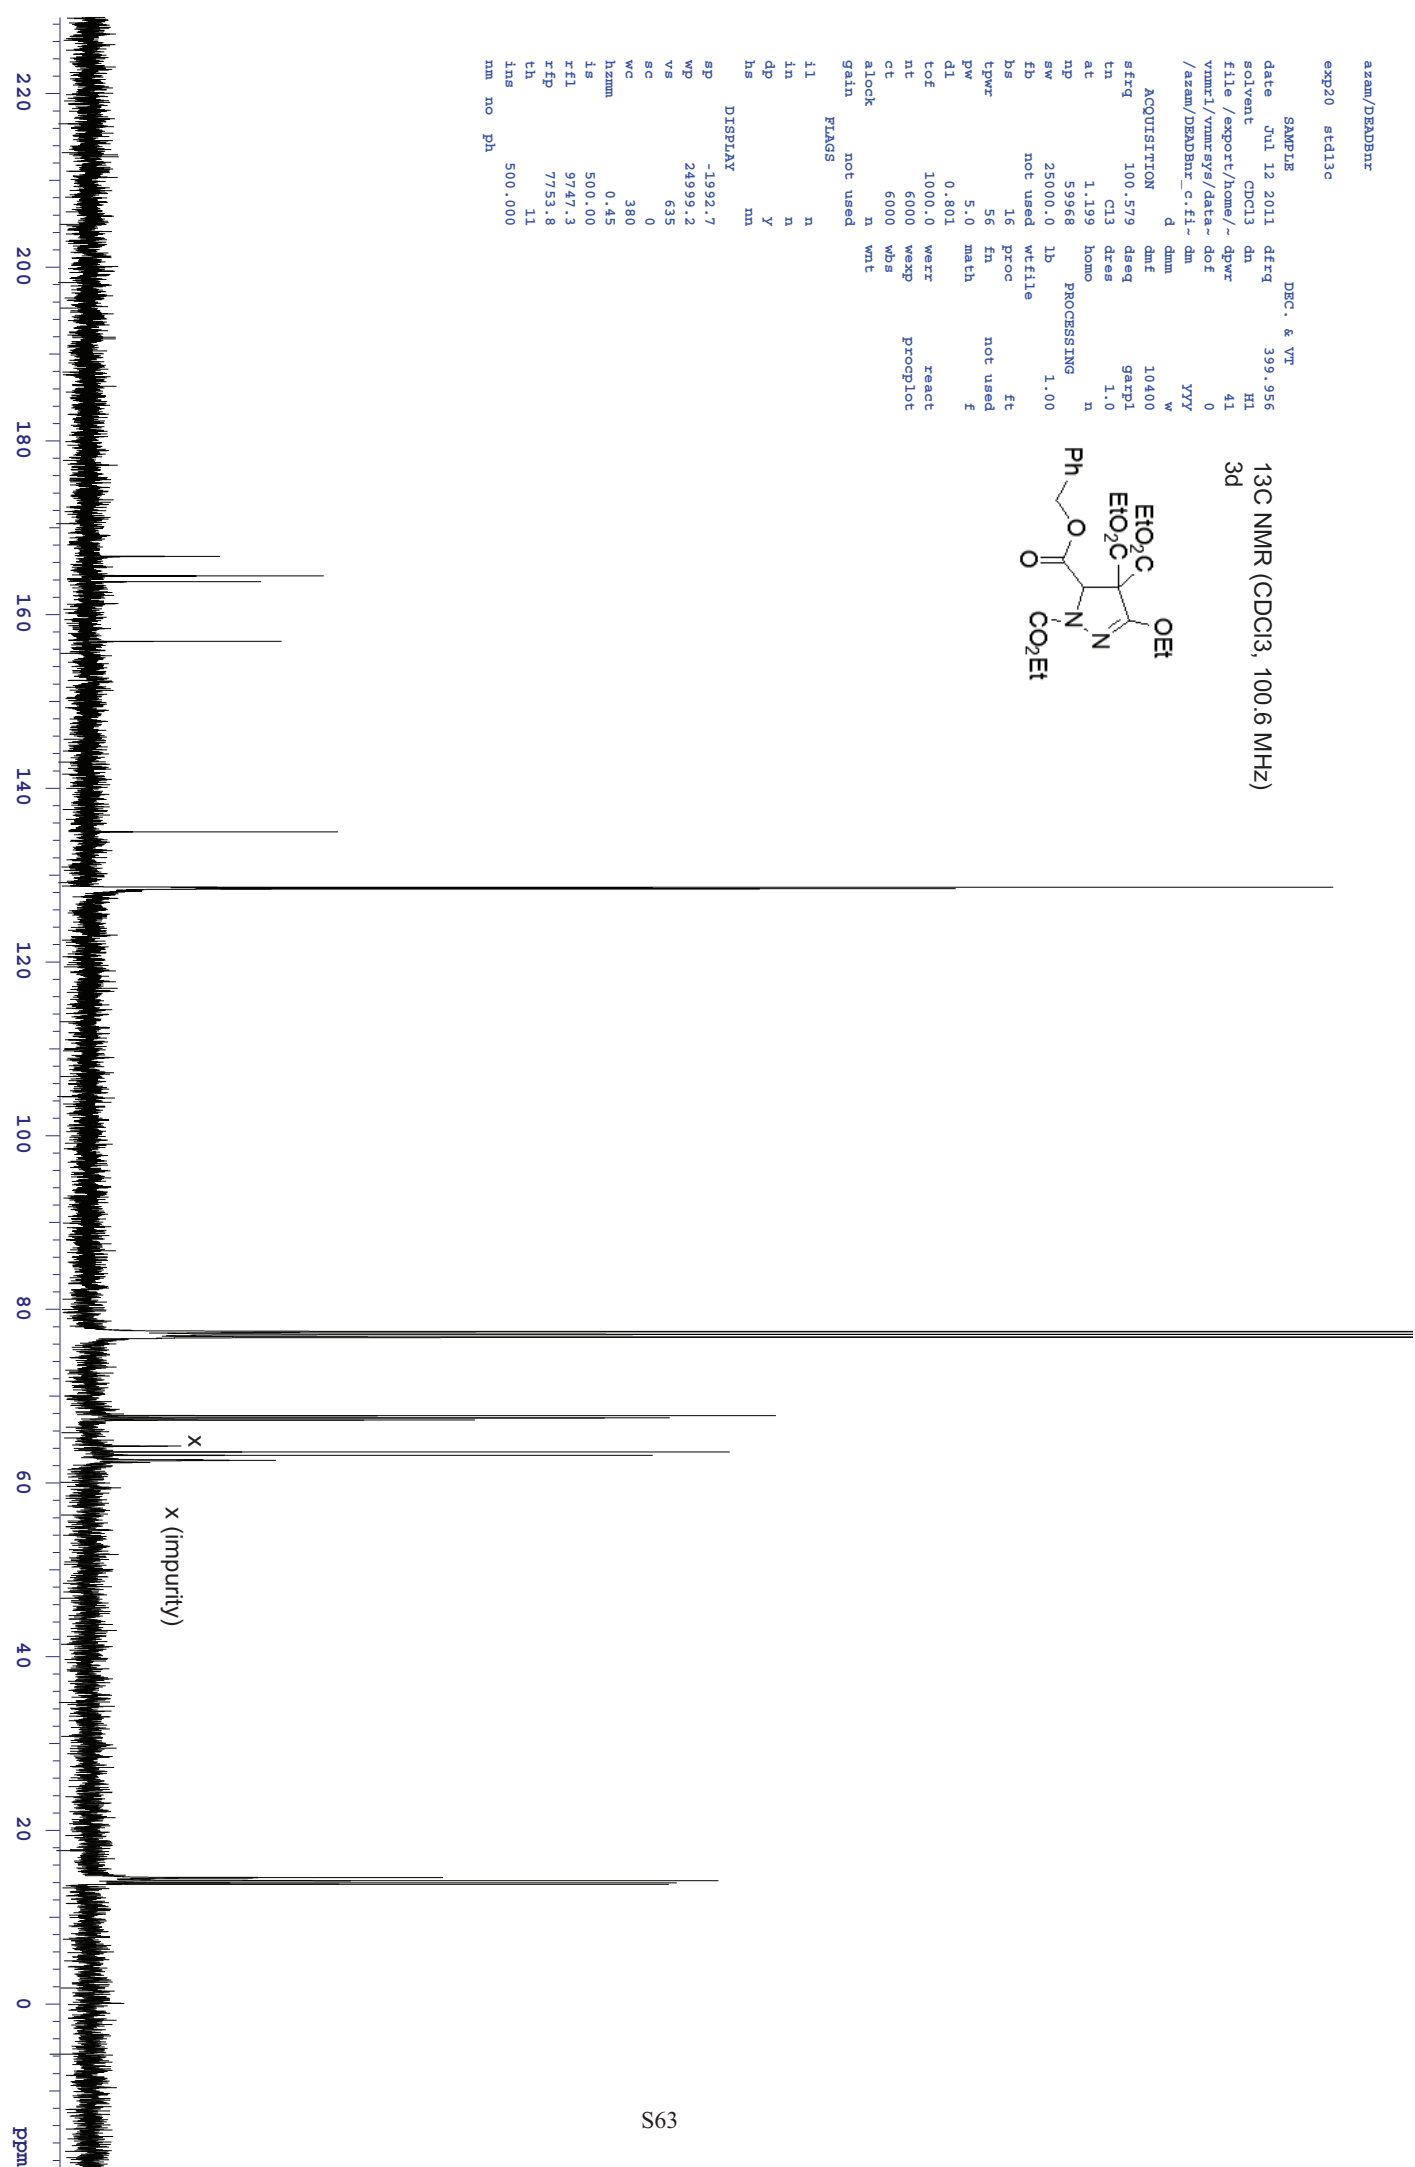

takebayashi7/ally1r  
 exp20 std1h

SAMPLE DEC. & VT  
 date Aug 9 2011 dfreq 399.956  
 solvent CDCl3 dn HI  
 file /export/home/~ dpwr 20  
 vnmr1/vnmr1s/data- dof 0  
 /takebayashi7/ally1r- dm nmm  
 1r\_h.fid dm c  
 ACQUISITION  
 sfreq 399.956 dmf 200  
 tn HI dres 1.0  
 at 3.744 homo n  
 np 44928 wtfile PROCESSING  
 sw 6000.6 not used proc ft  
 fb not used  
 bs 1 fn not used f  
 tpwr 61 match  
 pw 5.5  
 dl 1.256 werr react  
 tof 600.0 weap preplot  
 nt 16 wbs  
 ct 16 wnt  
 alock n  
 gain not used  
 FLAGS  
 l1 n  
 ln n  
 dp Y  
 hs mn  
 DISPLAY  
 sp -80.0  
 wp 4079.4  
 vs 214  
 ac 0  
 wc 380  
 hzmm 10.74  
 fs 1160.31  
 rfi 372.7  
 rfp 0  
 th 20  
 lns 100.000  
 nm ph

<sup>1</sup>H NMR (CDCl<sub>3</sub>, 400 MHz)  
 3e

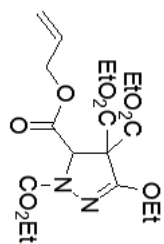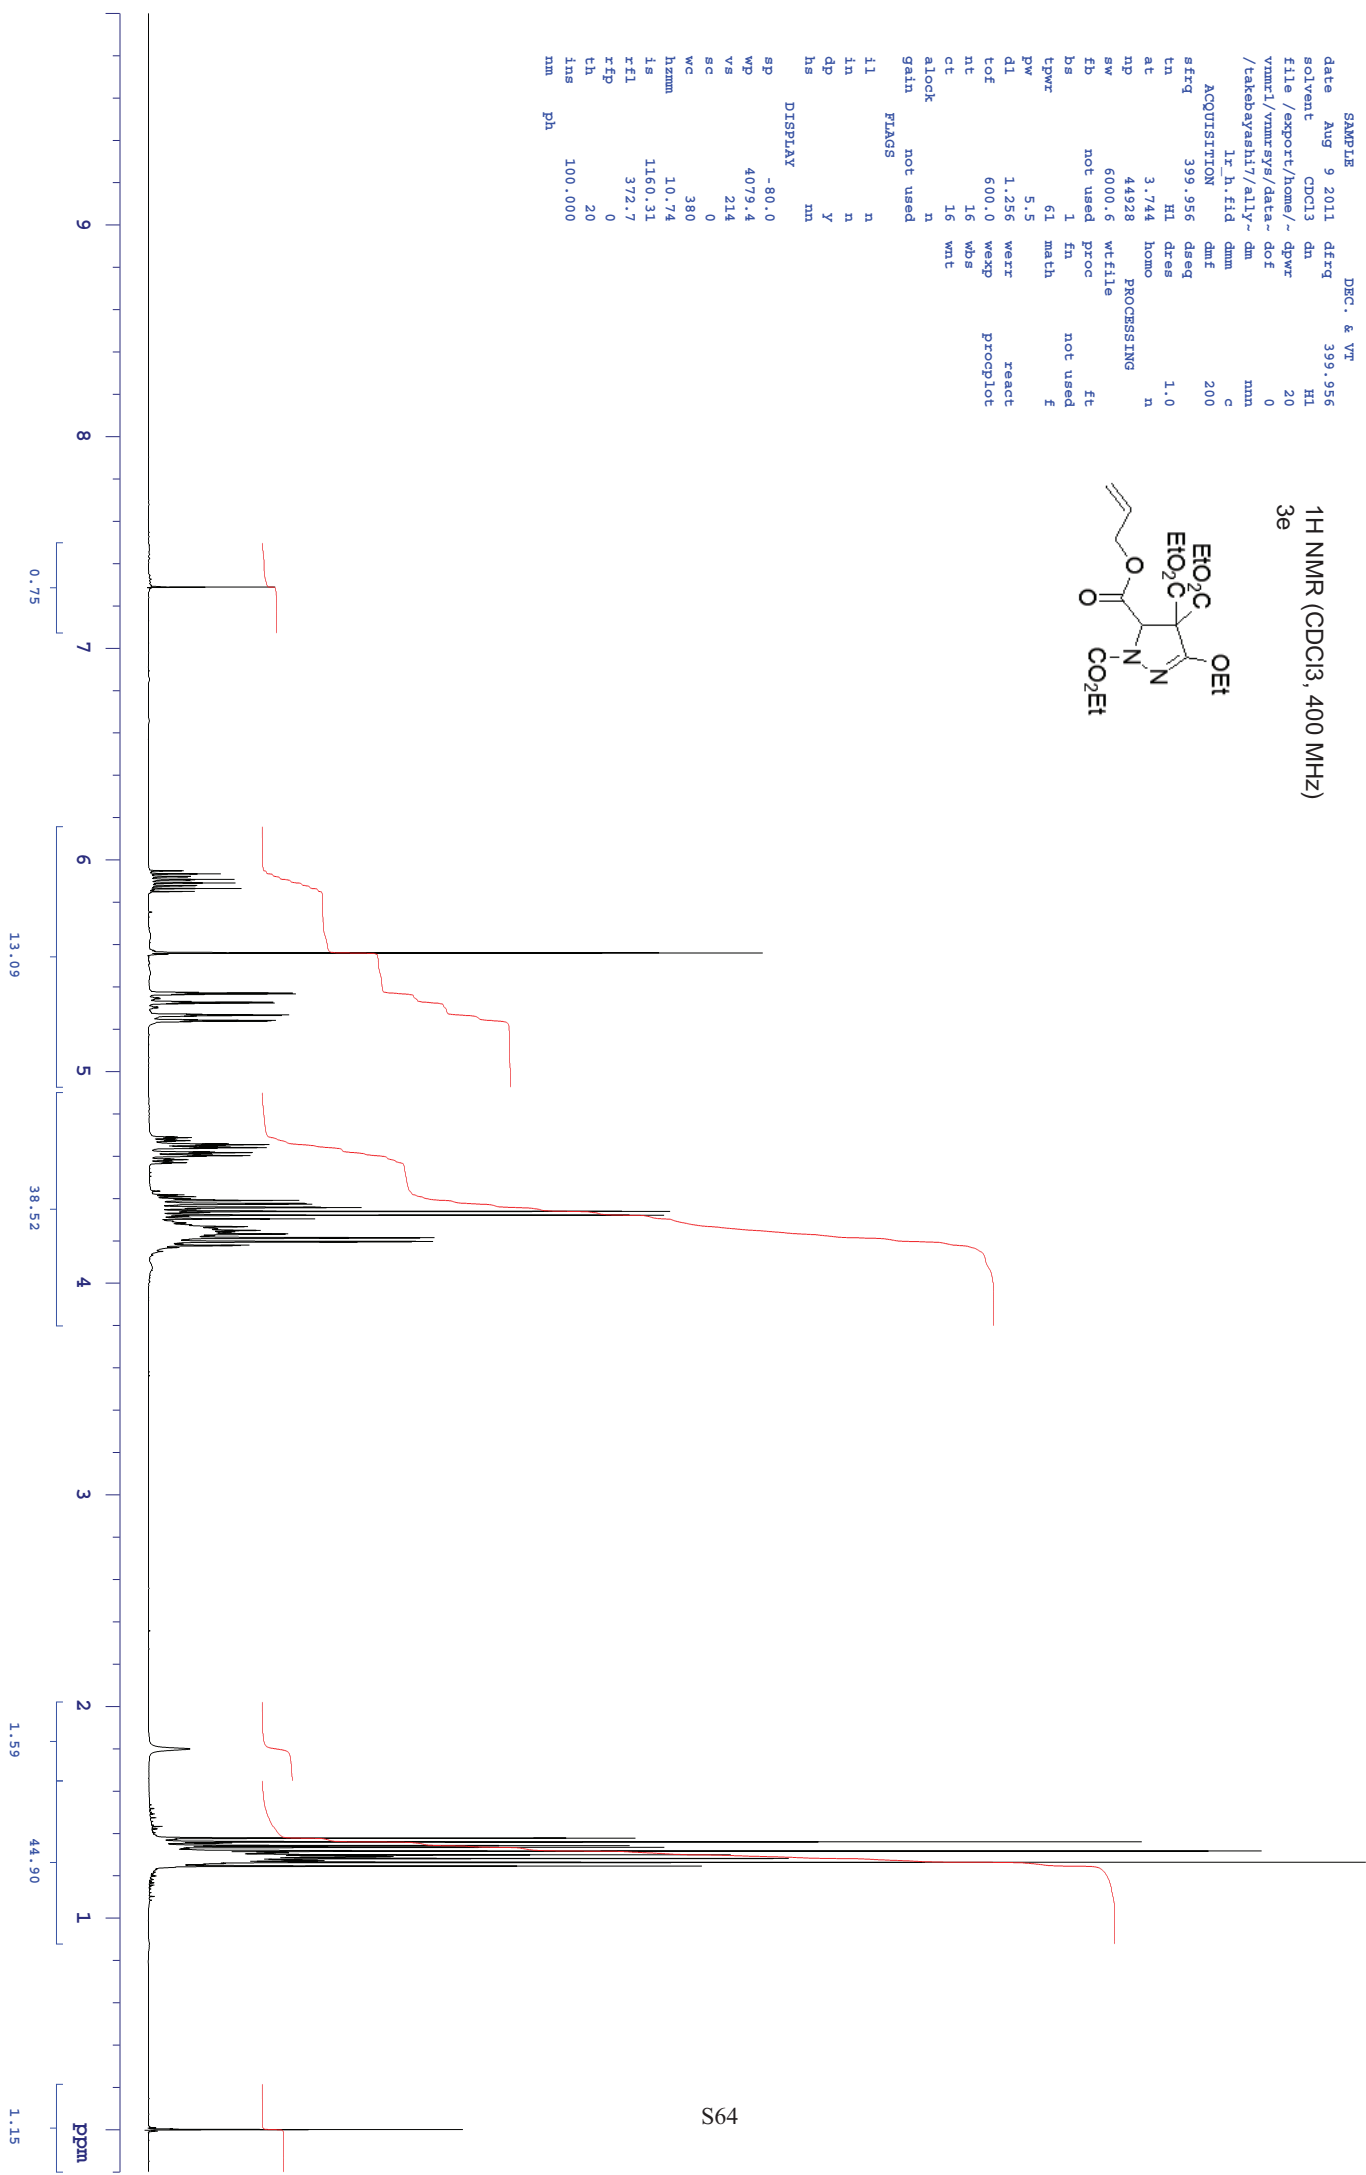



takebayashi7/ally1

exp20 std13c

SAMPLE DEC. & VT  
 date Aug 6 2011 dfreq 399.956  
 solvent CDCl3 dn H1  
 file /export/home/~ dpwr 41  
 vnmr1/vnmrsys/data-dof 0  
 /takebayashi7/ally1-dm  
 1\_c.fid dm yyy w

13C NMR (CDCl3, 100.6 MHz)  
 3e

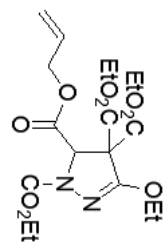

ACQUISITION  
 freq 100.579 dmf 10400  
 tn C13 dres 9arp1 1.0  
 at 1.199 homo n  
 np 59968 PROCESSING 1.00  
 sw 25000.0 lb  
 fb not used wfile  
 bs 16 proc ft  
 cpwr 56 fn not used  
 pw 5.0 math f  
 dl 0.801  
 tof 1000.0 weir react  
 nt 4096 wekp procp1ot  
 ct 4096 wbs  
 alock n wnt  
 gain not used

FLAGS  
 l1 n  
 ln n  
 dp Y  
 hs mn  
 DISPLAY

SP -2002.6  
 WP 24999.2  
 VS 214  
 SC 0  
 WC 380  
 hzmm 0.51  
 ls 500.00  
 rF1 9757.2  
 rFp 7753.8  
 th 37  
 fns 500.000  
 nm no ph

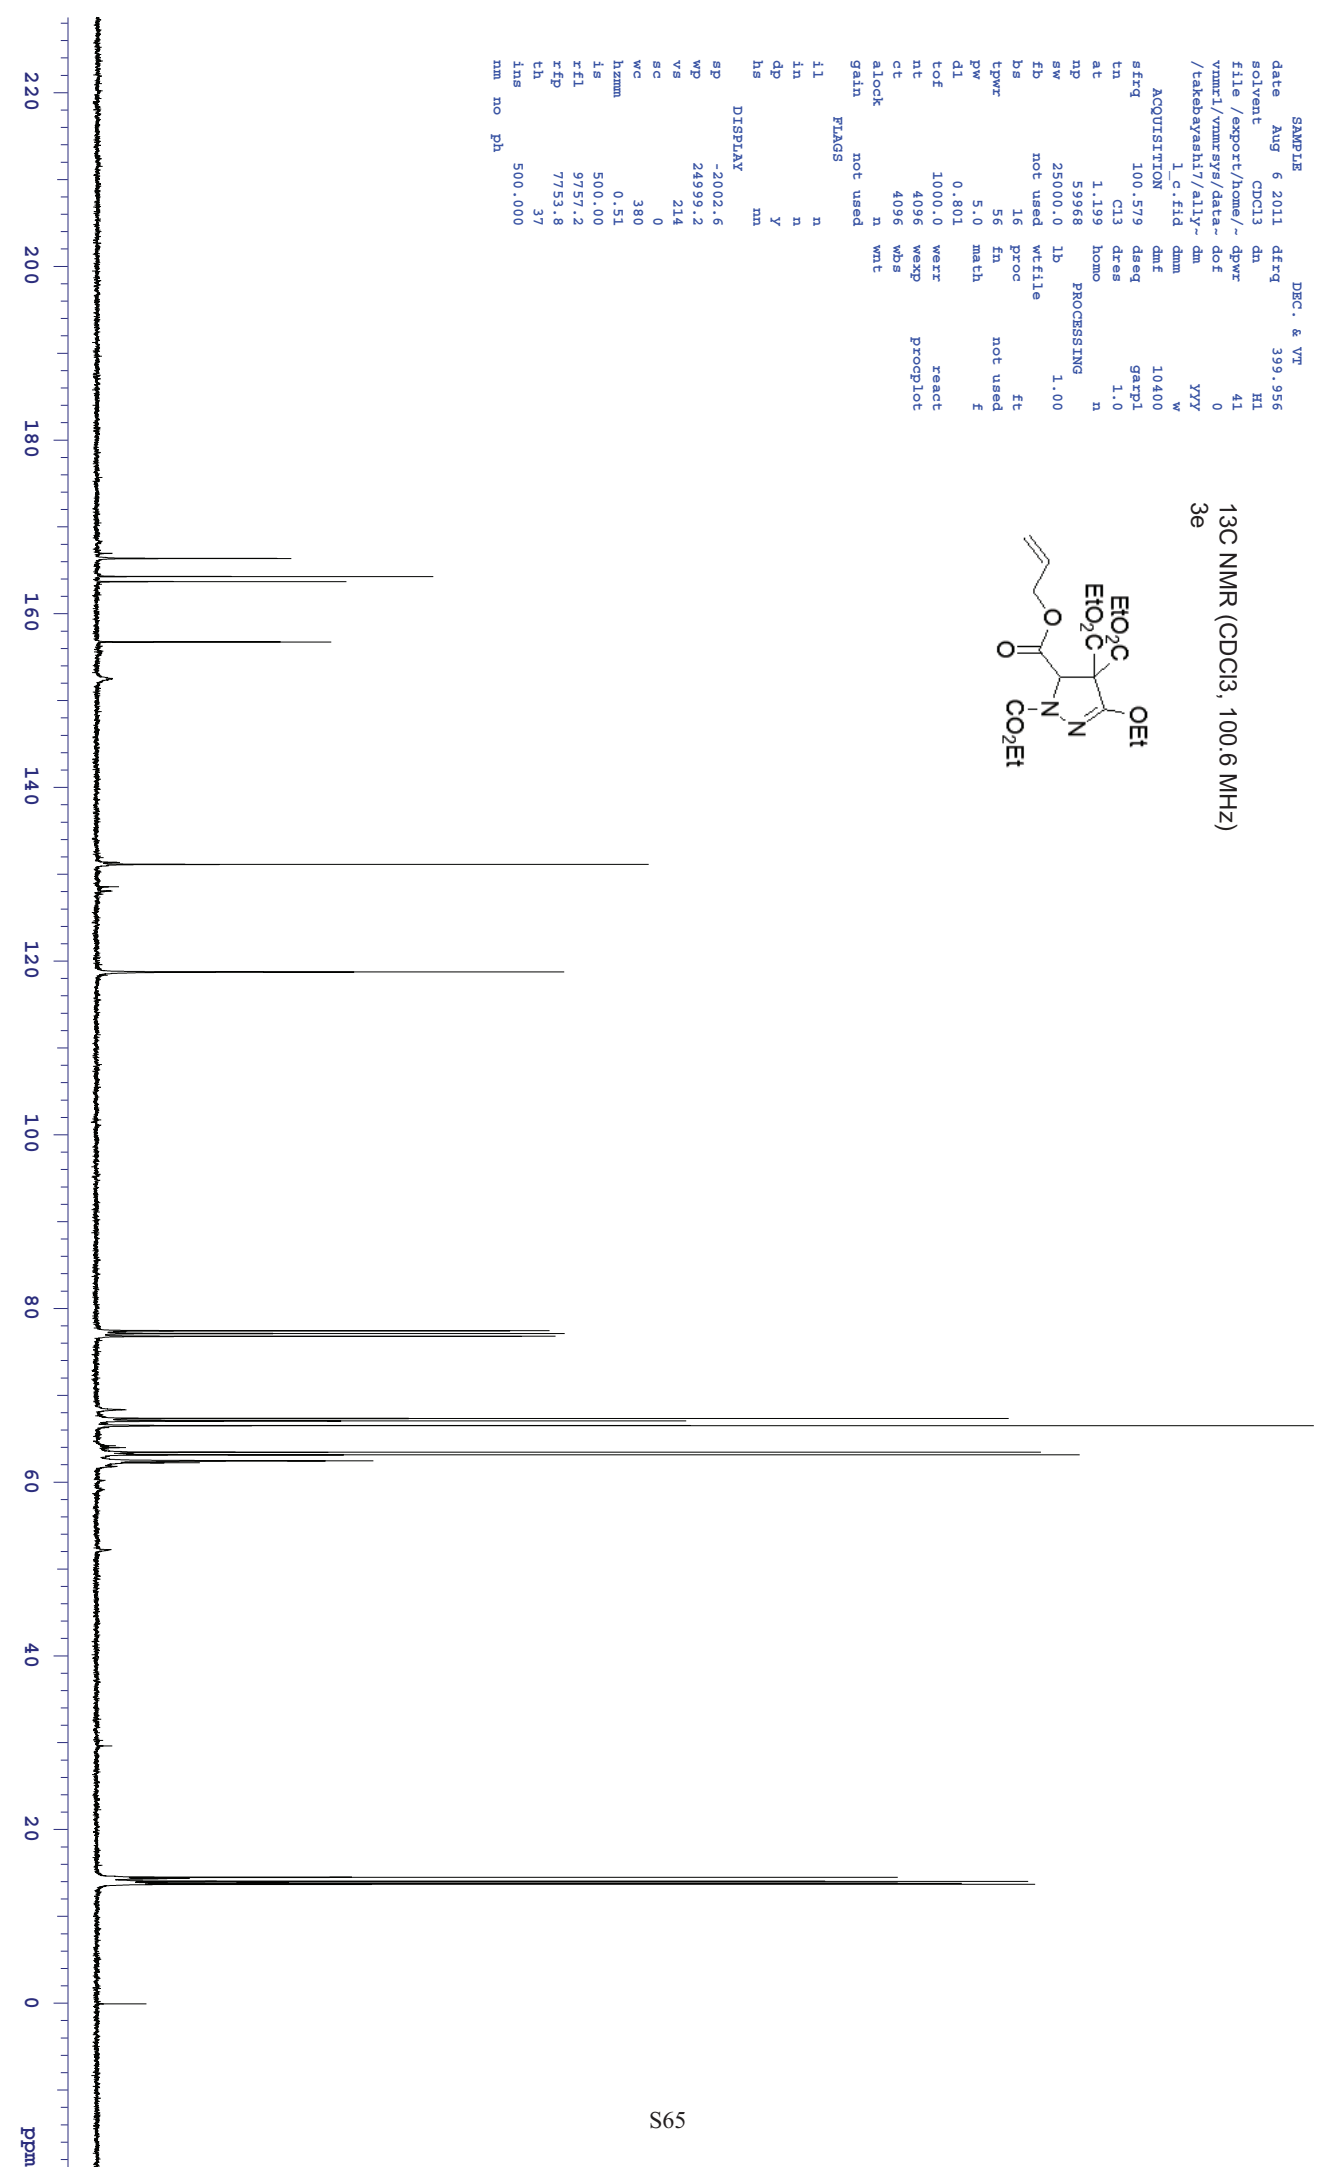

takebayashi7/propargylR  
 exp20 std1h

SAMPLE DEC. & VT  
 date Aug 18 2011 dfreq 399.956  
 solvent CDCl3 dn H1  
 file /export/home/~ dpwr 20  
 ynmr1/vnmrsys/data- dof 0  
 /takebayashi7/prop- dm  
 argy1R.h.fid dnm  
 ACQUISITION  
 sfreq 399.956 dmf 200  
 tn H1 dres 1.0  
 at 3.744 homo n  
 np 4928 PROCESSING  
 sw 6000.6 wfile  
 fb not used proc ft  
 bs 1 fn not used f  
 epwr 61 match  
 pw 5.5  
 dl 1.256 werr react  
 tof 600.0 weap procploc  
 nt 16 wbs  
 ct 16 wnt  
 alock y  
 gain not used  
 FLAGS  
 l1 n  
 ln n  
 dp y  
 hs mn  
 DISPLAY  
 sp -80.0  
 wp 4079.4  
 vs 214  
 ac 0  
 wc 380  
 hzmm 10.74  
 fs 1229.33  
 rfl 361.1  
 rfp 0  
 th 20  
 lns 100.000  
 nm ph

**1H NMR (CDCl3, 400 MHz)**  
**3f**

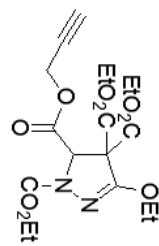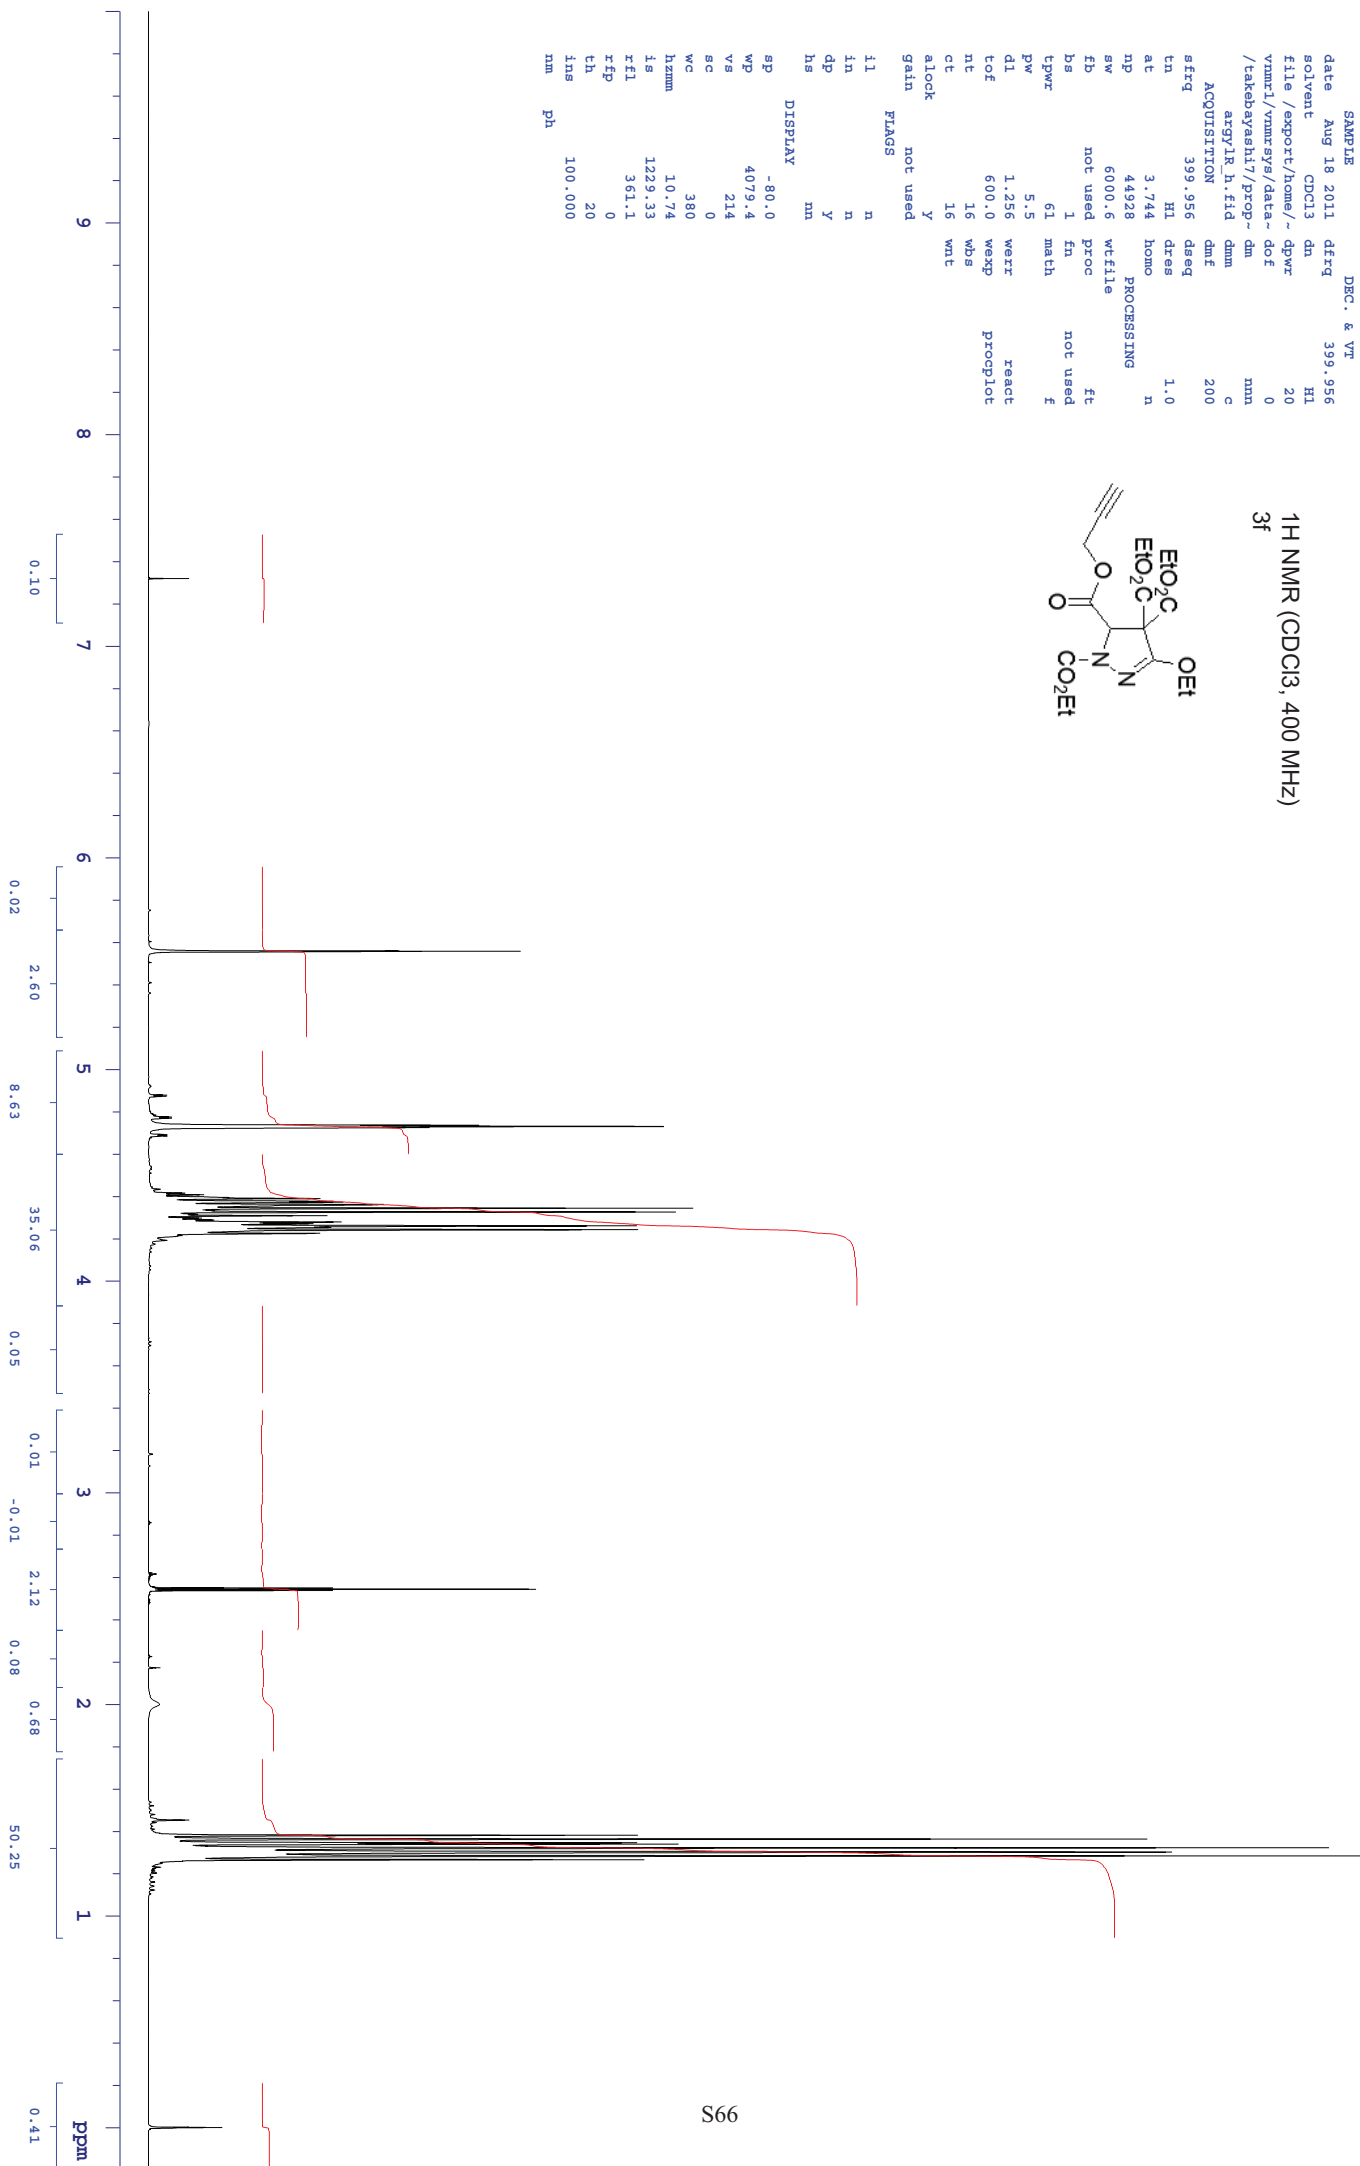

takebayashi7/propargyl1R

exp20 std13c

SAMPLE DEC. & VT  
 date Aug 18 2011 df-rq 399.956  
 solvent CDCl3 dn H1  
 file /export/home/~ dpwr 41  
 ynmr1/ymrasy/data-dof 0  
 /takebayashi7/prop-dm  
 argylr.c.fid dm  
 w

ACQUISITION  
 strq 100.579 dmf 10400  
 tn C13 dres 9arp1  
 at 1.199 homo n  
 np 59968 PROCESSING  
 sw 25000.0 lb 1.00  
 fb not used wfile  
 bs 16 proc ft  
 cpwr 56 fn not used  
 pw 5.0 math f  
 dl 0.801  
 tof 1000.0 weir react  
 nt 4096 wekp procp1ot  
 ct 1830 wbs  
 alock n wnt  
 gain not used

FLAGS  
 l1 n  
 ln n  
 dp Y  
 hs m  
 DISPLAY  
 sp -2001.9  
 wp 24999.2  
 vs 214  
 sc 0  
 wc 380  
 hzmm 65.79  
 ls 500.00  
 rfl 9756.5  
 rfp 7753.8  
 th 20  
 fns 500.000  
 nm no ph

13C NMR (CDCl3, 100.6 MHz)  
 3f

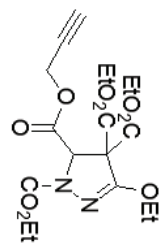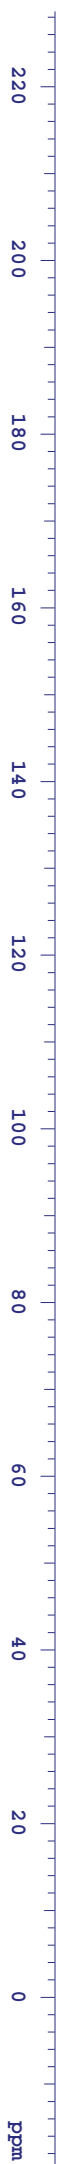

takebayashi7/MeC=C

exp20 std1h

SAMPLE DEC. & VT  
 date Aug 6 2011 dfreq 399.956  
 solvent CDCl3 dn H1  
 file /export/home/~ dpwr 20  
 vnmr1/vnmrsys/data- dof 0  
 /takebayashi7/MeC=C- dm nmh  
 C\_h.fid dnm c

ACQUISITION  
 sfreq 399.956 dmf 200  
 tn H1 dres 1.0

at 3.744 homo n  
 np 44928 PROCESSING

fb not used proc ft  
 bs 1 fn not used f

tpwr 61 match  
 pw 5.5  
 dl 1.256 werr react

cof 600.0 weap procploc

nt 16 wbs  
 ct 16 wnt

alock y  
 gain not used

FLAGS  
 l1 n  
 l2 n  
 dp y  
 hs nm

DISPLAY  
 sp -80.0  
 wp 4079.4  
 vs 214  
 ac 0  
 wc 380

hzmm 10.74  
 ls 990.51  
 rfl 375.4  
 rfp 0  
 th 20  
 lns 100.000  
 nm

ph

1H NMR (CDCl3, 400 MHz)  
 5

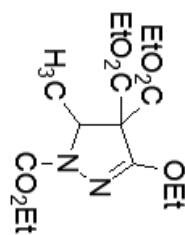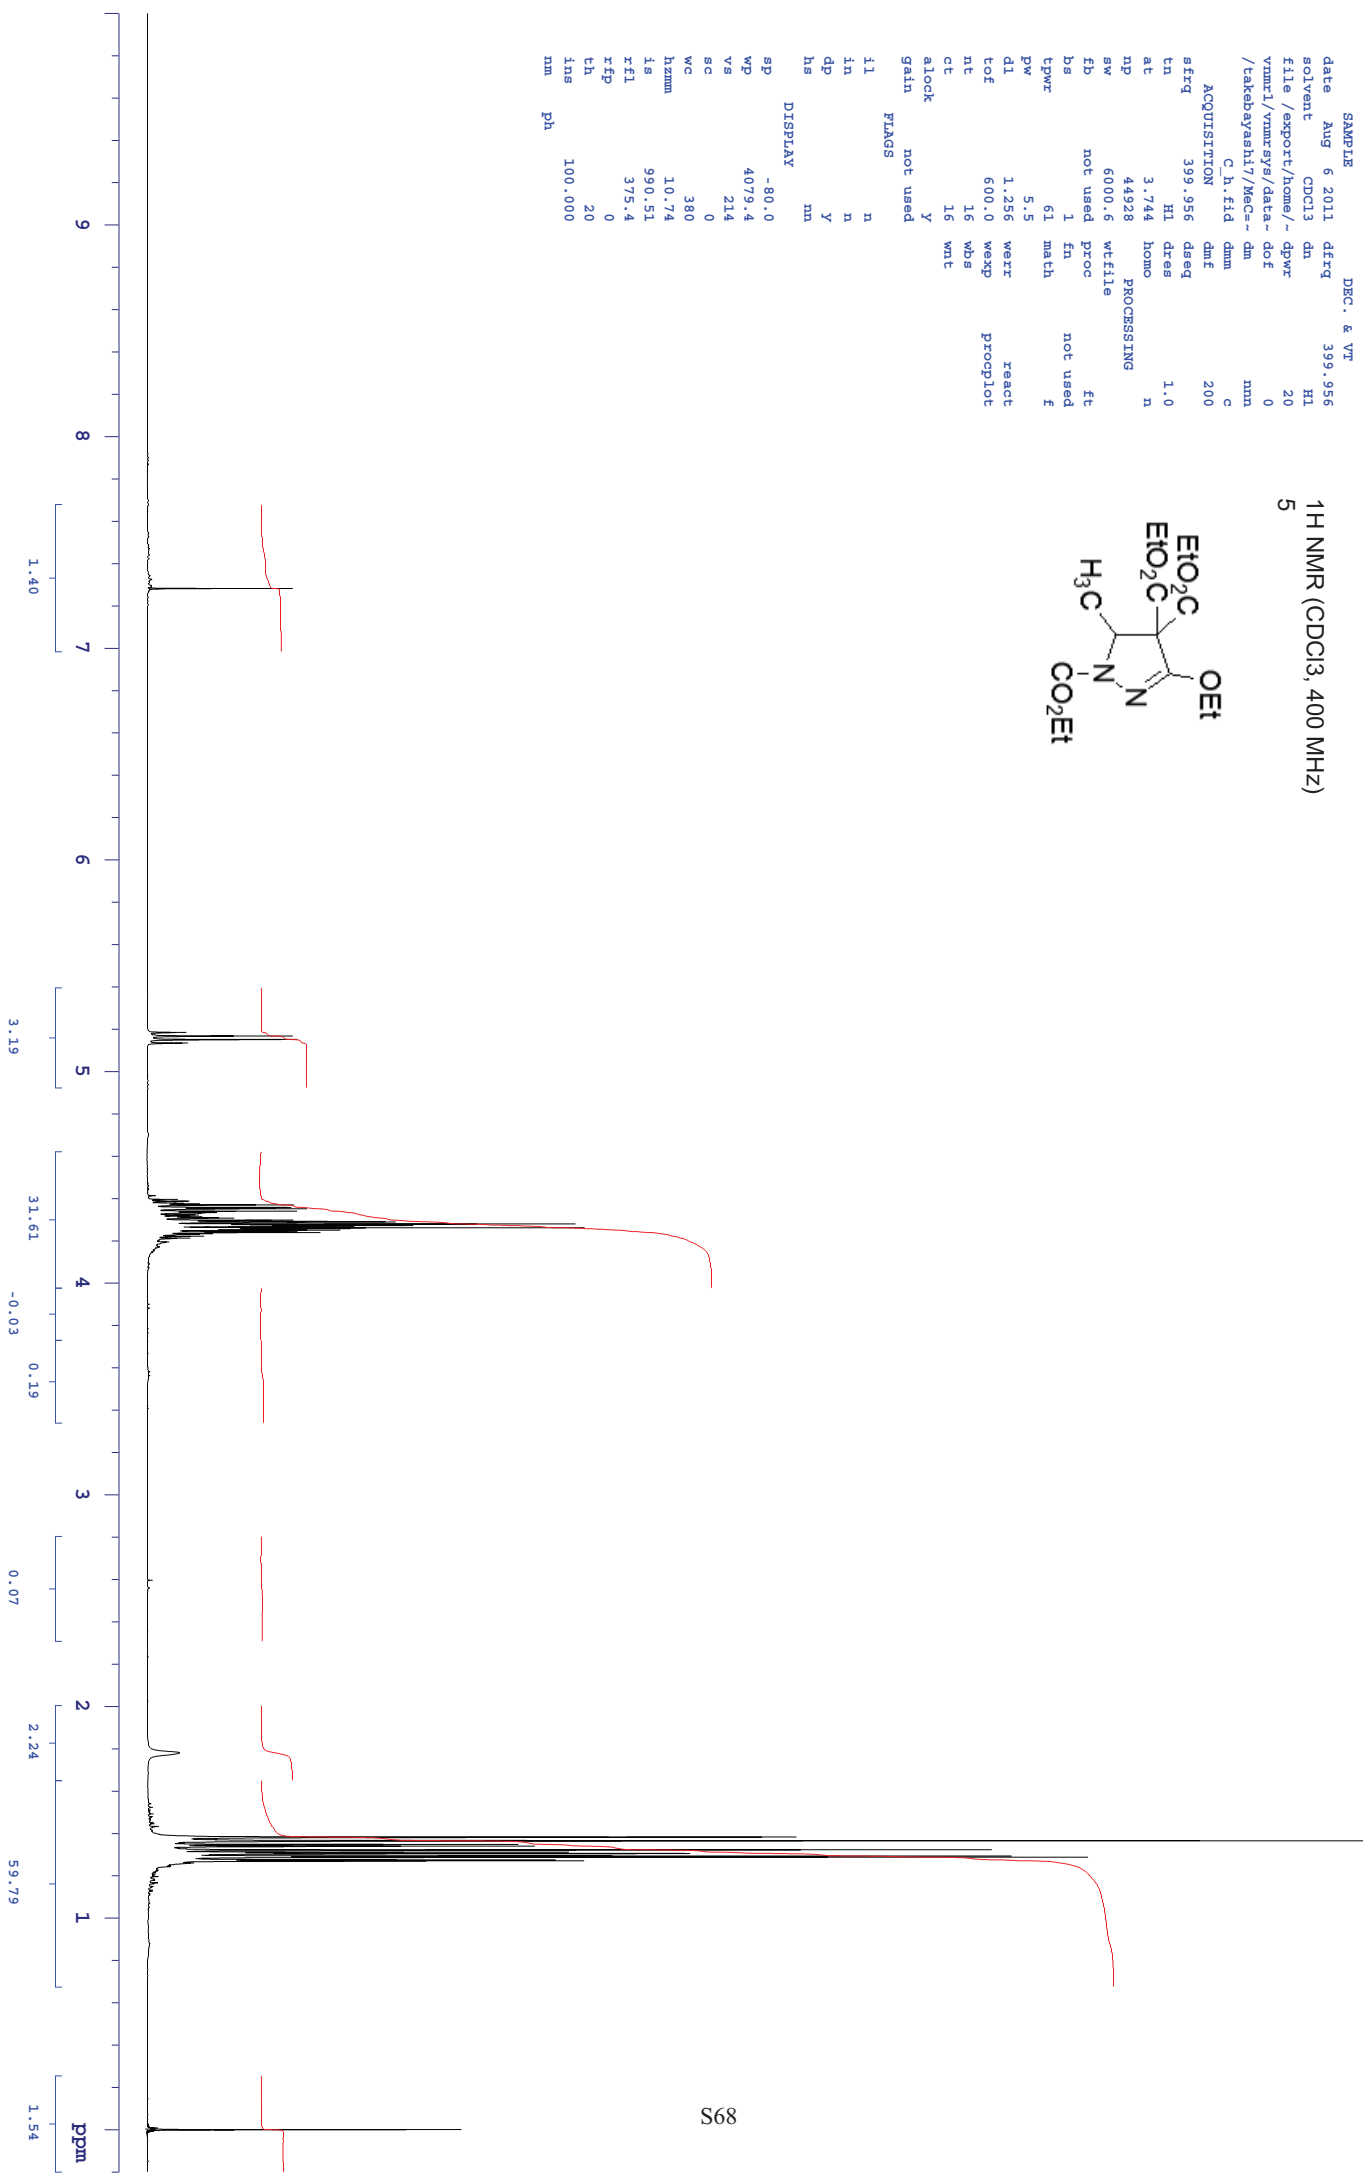

takebayashi7/Mec=C  
 exp20 std13c

SAMPLE DEC. & VT  
 date Aug 6 2011 dfrq 399.956  
 solvent CDCl3 dn H1  
 file /export/home/~ dpwr 41  
 vnmr1/vnmrsys/data- dof 0  
 /takebayashi7/Mec=C- dm  
 C\_c.fid dmm yyy w

ACQUISITION  
 sfrq 100.579 dmf 10400  
 tn C13 dres 9arp1 1.0  
 at 1.199 homo n  
 np 59968 PROCESSING 1.00  
 sw 25000.0 lb  
 fb not used wfile  
 bs 16 proc ft  
 cpwr 56 fn not used  
 pw 5.0 math f  
 dl 0.801  
 tof 1000.0 weir react  
 nt 2048 wexp procp1ot  
 ct 2048 wbs  
 alock n wnt  
 gain not used

FLAGS  
 f1 n  
 f2 n  
 dp Y  
 hs m  
 DISPLAY  
 sp -1995.0  
 wp 24999.2  
 vs 214  
 sc 0  
 wc 380  
 hzmm 1.51  
 fs 500.00  
 rfl 9749.6  
 rfp 7753.8  
 th 20  
 fns 500.000  
 nm no ph

<sup>13</sup>C NMR (CDCl<sub>3</sub>, 100.6 MHz)  
 5

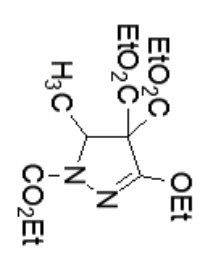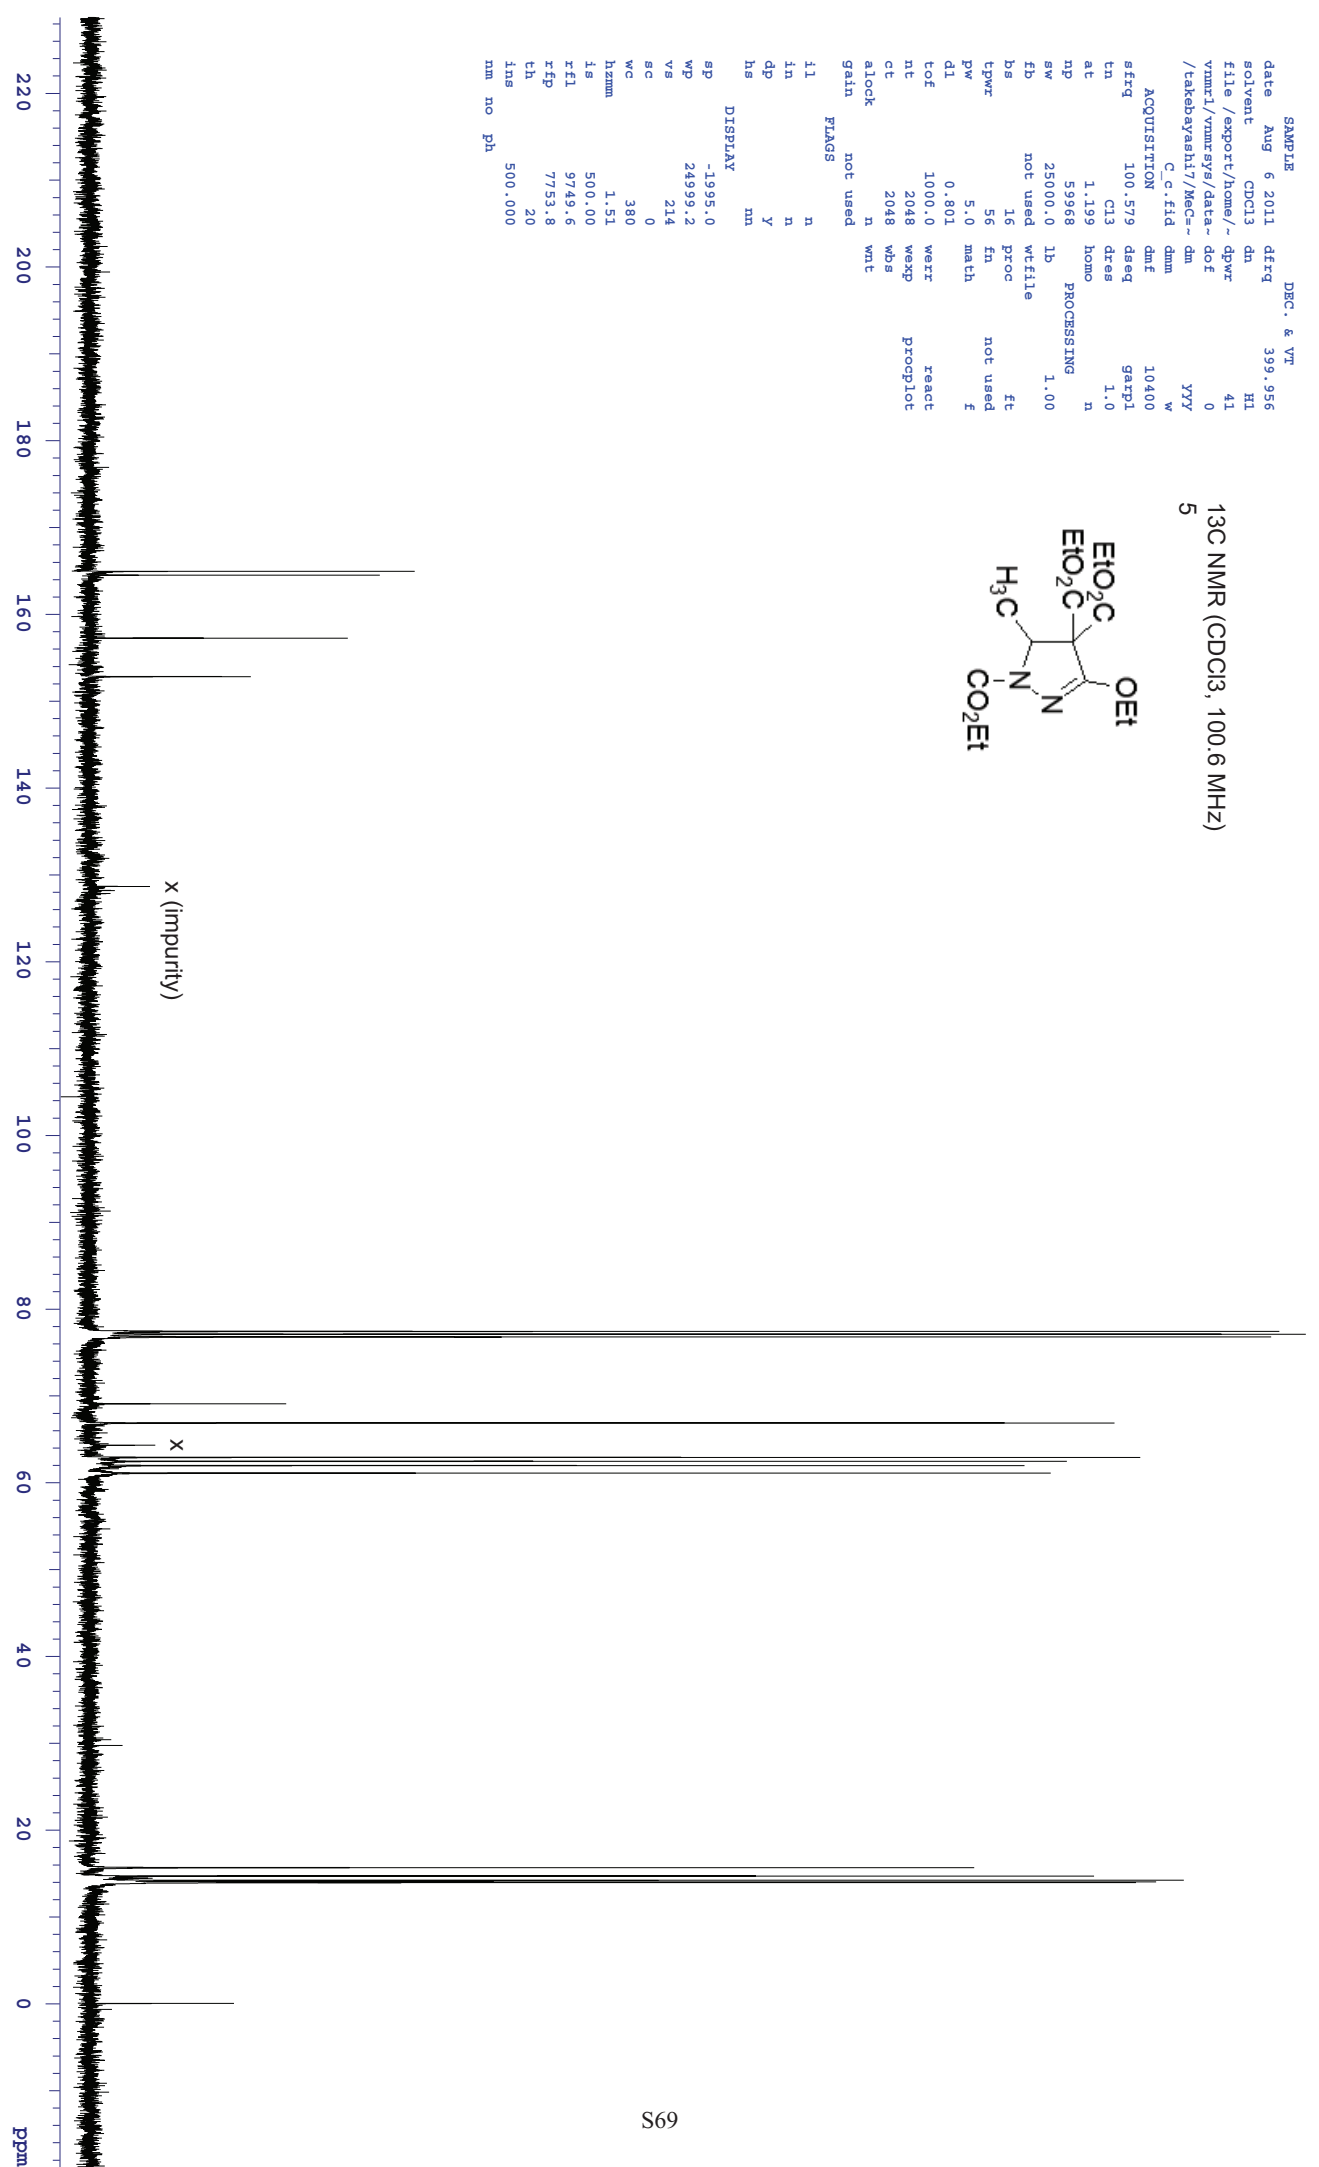

fujinami/POMe  
 exp20 std1h

SAMPLE DEC. & VT  
 date Sep 22 2011 dfreq 399.956  
 solvent CDCl3 dn H1  
 file /export/home/~ dpwr 20  
 vnmr1/vnmrsys/data- dof 0  
 /fujinami/POMe\_h.f-dm nmn  
 c

ACQUISITION  
 srfreq 399.956 dmf 200

tn H1 dres 1.0

at 3.744 homo n

np 44928 PROCESSING

sw 6000.6 wtf file

fb not used proc ft

bs 1 fn not used f

tpwr 61 match

pw 5.5

dl 1.256 werr react

tcf 600.0 weap procploc

nt 16 wbs

ct 16 wnt

alock n

gain not used

flngs n

l1 n

l2 n

dp y

hs mn

DISPLAY

sp -80.0

wp 4079.4

vs 214

sc 0

wc 380

h2mm 10.74

ls 593.45

rfl 378.2

rhp 0

th 20

ins 100.000

nm

**1H NMR (CDCl3, 400 MHz)  
 7a**

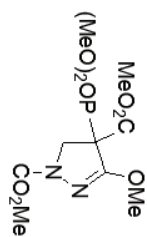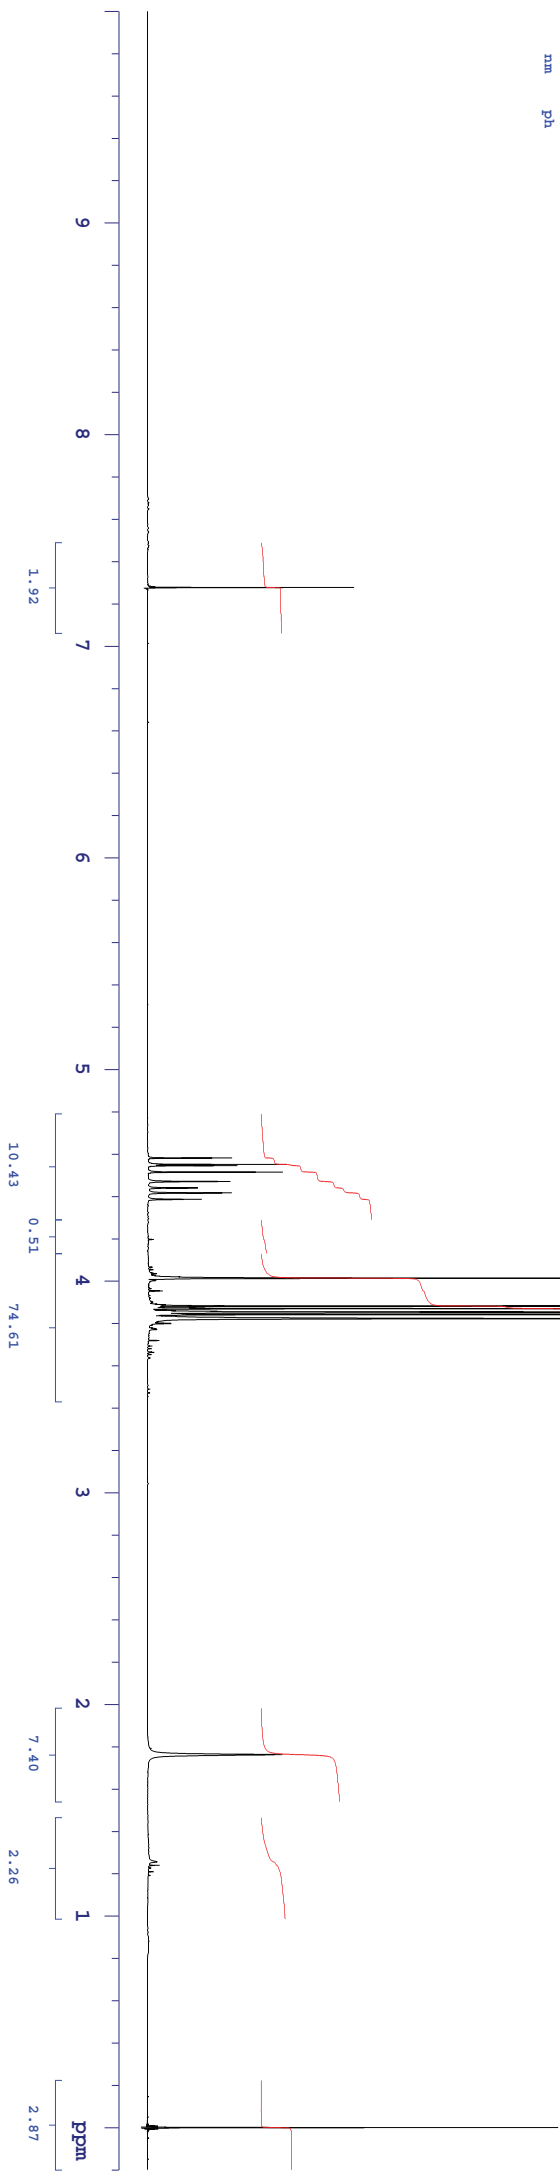

fujinami/POMe  
 exp20 std13c

SAMPLE DEC. & VT  
 date Sep 22 2011 dfreq 399.956  
 solvent CDCl3 dn H1  
 file /export/home/~ dpwr 41  
 vnmr1/vnmrsys/data-dof 0  
 /fujinami/POMe\_c.f-dm YYY

13C NMR (CDCl3, 100.6 MHz)  
 7a

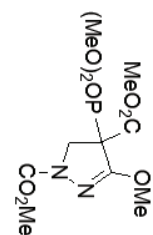

ACQUISITION  
 freq 100.579 dmf 10400  
 tn C13 dseq 9arp1  
 at 1.199 homo n  
 np 59968 PROCESSING  
 sw 25000.0 lb 1.00  
 fb not used wfile  
 bs 16 proc ft  
 cpwr 56 fn not used  
 pw 5.0 math f  
 dl 0.801  
 tof 1000.0 weir react  
 nt 8192 wexp procp1ot  
 ct 8192 wbs  
 alock n wnt  
 gain not used

FLAGS  
 l1 n  
 ln n  
 dp Y  
 hs mn

DISPLAY  
 sp -1995.0  
 wp 24999.2  
 vs 518  
 sc 0  
 wc 380  
 hzmm 0.57  
 ls 500.00  
 rfl 9749.6  
 rfp 7753.8  
 th 5  
 fns 500.000  
 nm no ph

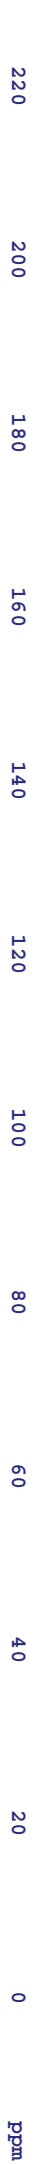

fujinami/CP3  
 exp20 std1h

SAMPLE DEC. & VT  
 date Nov 14 2011 dfrq 399.956  
 solvent CDCl3 dn H1  
 file /export/home/~ dpwr 20  
 vnmr1/vnmr3ys/data- dof 0  
 /fujinami/CP3\_h.fi- dm nm  
 ACQUISITION d dnm  
 dmf 200  
 sfrq 399.956 deeq  
 tn H1 dres 1.0  
 at 3.744 homo n  
 np 44928 wtfile PROCESSING  
 sw 6000.6 not used ft  
 fb not used proc f  
 bs 1 fn not used f  
 tpwr 61 match  
 pw 5.5  
 dl 1.256 werr react  
 tof 600.0 weqp precploc  
 nt 16 wbs  
 ct 16 wnt  
 alock y  
 gain not used  
 FLAGS  
 l1 n  
 ln n  
 dp y  
 hs mn  
 DISPLAY  
 sp -80.0  
 wp 4079.4  
 vs 214  
 ac 0  
 wc 380  
 hzmm 10.74  
 ls 531.75  
 rfl 378.2  
 rfp 0  
 th 20  
 lns 100.000  
 nm  
 ph

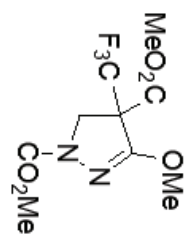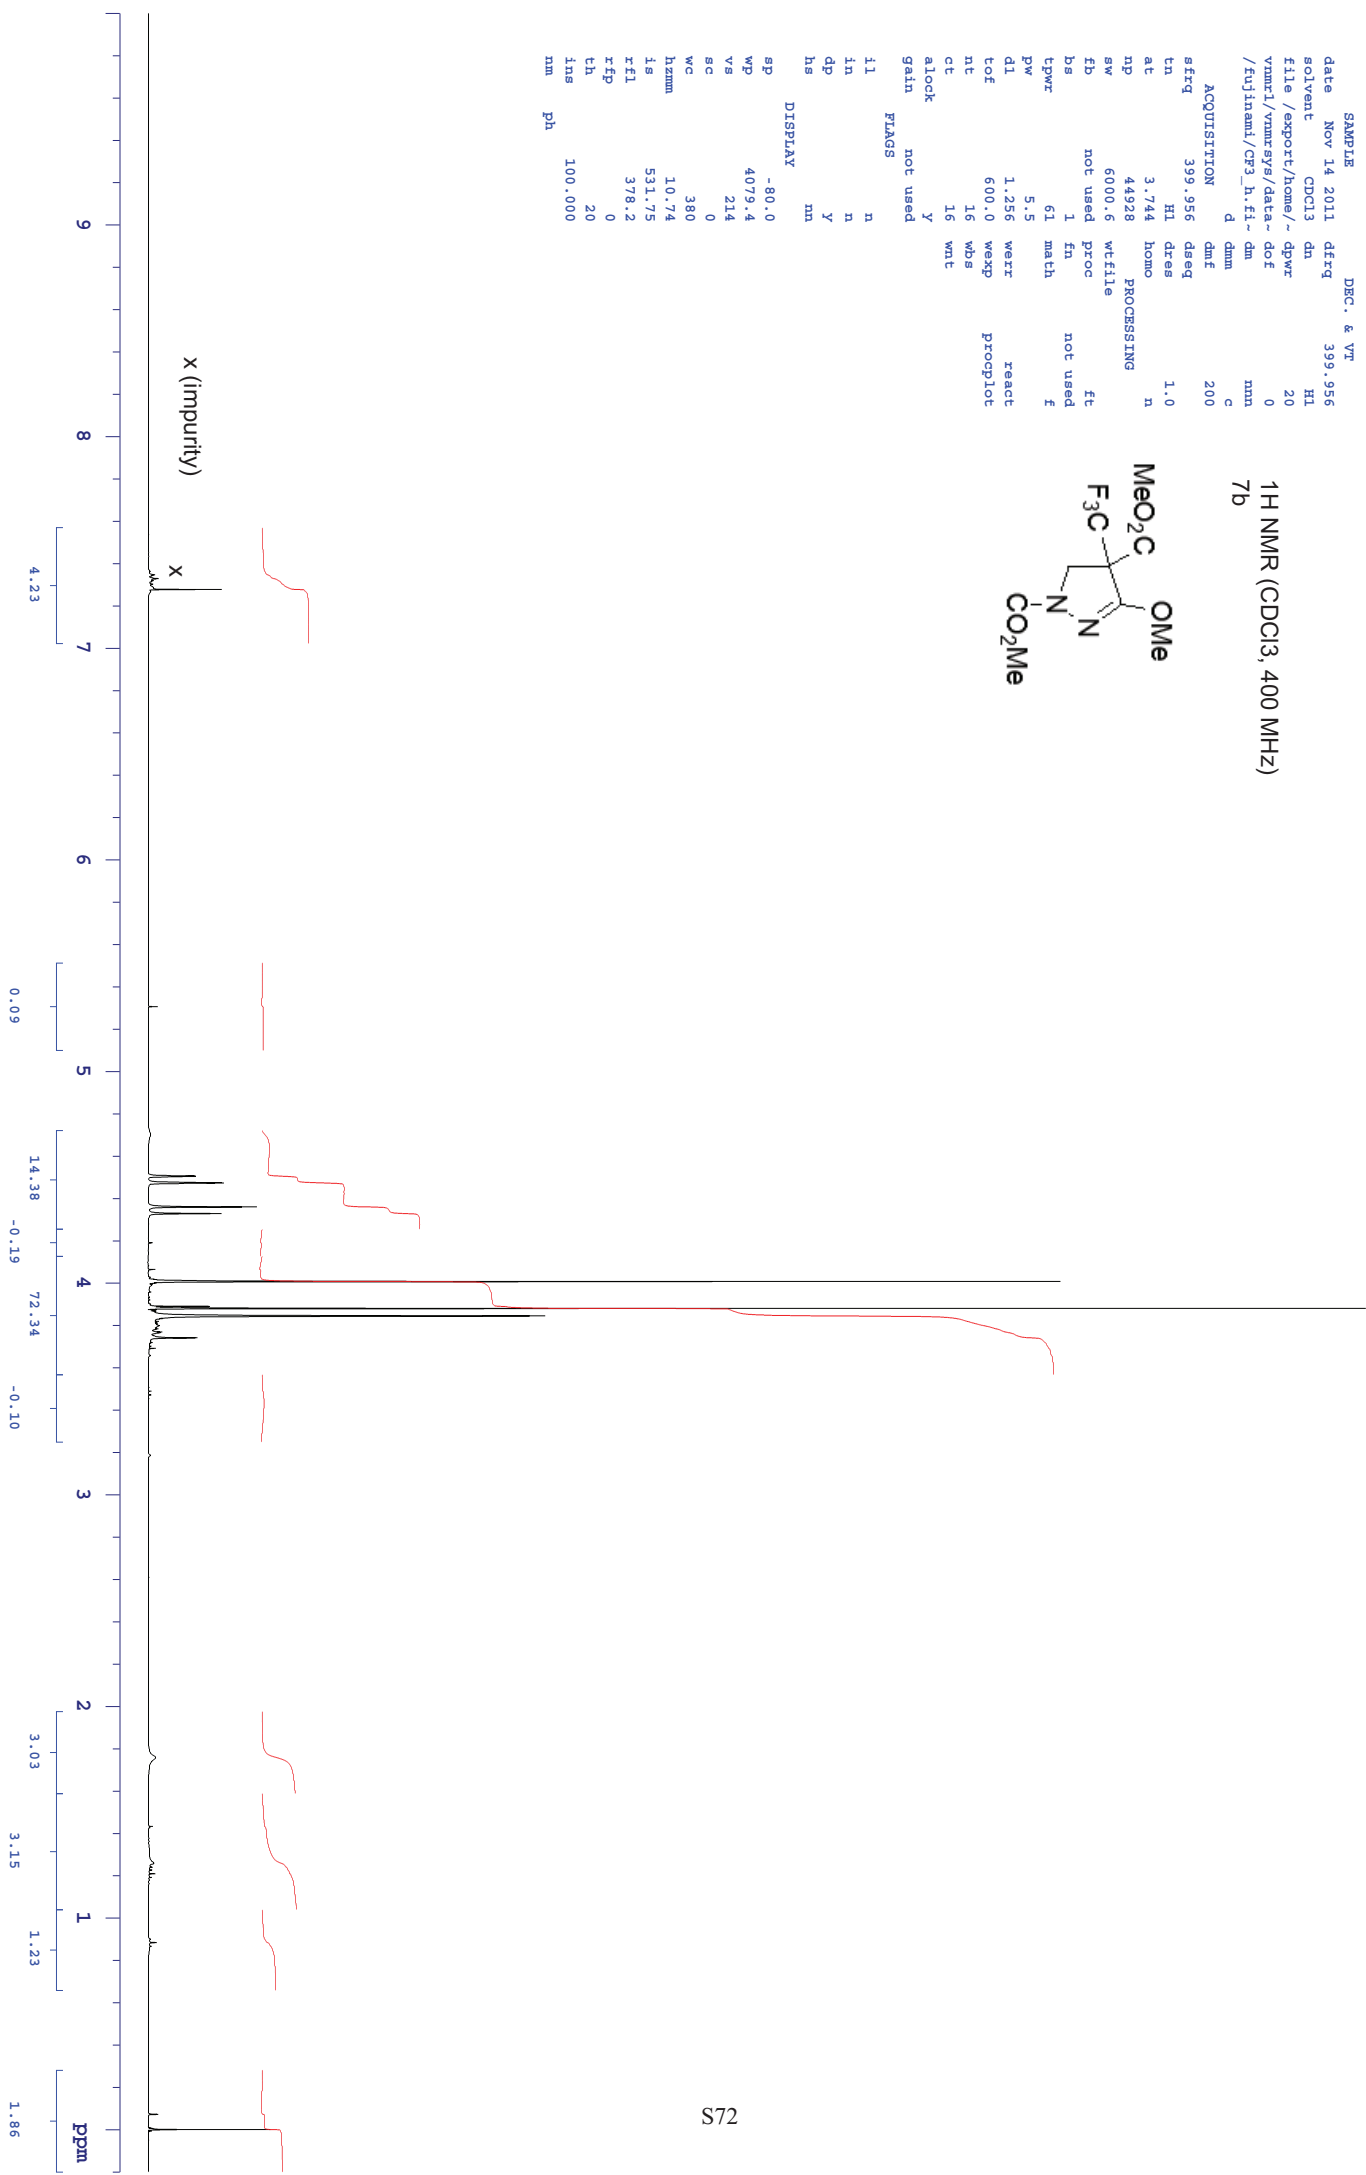



fujinami/CP3  
 exp20 std13c

13C NMR (CDCl3, 100.6 MHz)  
 7b

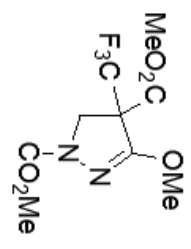

```

SAMPLE          DEC. & VT
date   Nov 14 2011   dfreq   399.956
solvent CDCl3        dn
file   /export/home/~ dpwr   41
vnmr1/vnmrsys/data- dof   0
/fujinami/CP3_c.f1- dm
                        d dmm
ACQUISITION
sfrq   100.579       dmf   10400
tn     C13          dresq  9arp1
at     1.199        homo   1.0
np     59968        PROCESSING
sw     25000.0      lb     1.00
fb     not used     wfile
bs     16           proc   ft
cpwr   56          fn     not used
pw     5.0         math   f
dl     0.801
tof    1000.0      werr   react
nt     8192        wexp   procplot
ct     8192        wbs
alock  not used    n     wnt
gain   not used
      FLAGS
l1     n
l2     n
l3     n
l4     n
l5     n
l6     n
l7     n
l8     n
l9     n
l10    n
l11    n
l12    n
l13    n
l14    n
l15    n
l16    n
l17    n
l18    n
l19    n
l20    n
l21    n
l22    n
l23    n
l24    n
l25    n
l26    n
l27    n
l28    n
l29    n
l30    n
l31    n
l32    n
l33    n
l34    n
l35    n
l36    n
l37    n
l38    n
l39    n
l40    n
l41    n
l42    n
l43    n
l44    n
l45    n
l46    n
l47    n
l48    n
l49    n
l50    n
l51    n
l52    n
l53    n
l54    n
l55    n
l56    n
l57    n
l58    n
l59    n
l60    n
l61    n
l62    n
l63    n
l64    n
l65    n
l66    n
l67    n
l68    n
l69    n
l70    n
l71    n
l72    n
l73    n
l74    n
l75    n
l76    n
l77    n
l78    n
l79    n
l80    n
l81    n
l82    n
l83    n
l84    n
l85    n
l86    n
l87    n
l88    n
l89    n
l90    n
l91    n
l92    n
l93    n
l94    n
l95    n
l96    n
l97    n
l98    n
l99    n
l100   n
      DISPLAY
sp     -1995.0
wp     24999.2
vs     302
sc     0
wc     380
h2mm   0.47
ls     500.00
rf1    9749.6
rfp    7753.8
th     3
fns    500.000
nm no  ph
    
```

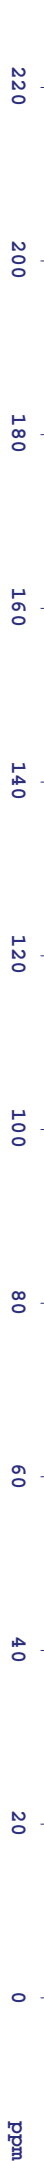

fujinami/CP3tBu  
 exp20 std1h

<sup>1</sup>H NMR (CDCl<sub>3</sub>, 400 MHz)  
 Tc

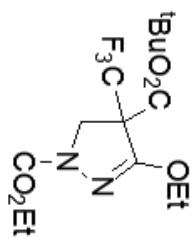

|                         |                    |        |          |            |
|-------------------------|--------------------|--------|----------|------------|
| date                    | Dec 20 2011        | dfreq  | 399.956  | DEC. & VT  |
| solvent                 | CDCl3              | dn     | H1       |            |
| file                    | /export/home/~dpwr | dpwr   | 20       |            |
| vrnmr1/vnmrsys/data-dof |                    | dof    | 0        |            |
| /fujinami/CP3tBu_h-dm   |                    | dm     | nmr      |            |
|                         |                    | dm     | c        |            |
| ACQUISITION             |                    |        |          |            |
| strq                    | 399.956            | dme    | 200      |            |
| tn                      | H1                 | dseq   | 1.0      |            |
| at                      | 3.744              | homo   | n        |            |
| np                      | 44928              | wtfile |          | PROCESSING |
| sw                      | 6000.6             | proc   | ft       |            |
| fb                      | not used           | fn     | not used |            |
| bpwr                    | 1                  | match  | f        |            |
| pw                      | 5.5                | weir   | react    |            |
| dl                      | 1.256              | wasp   | preplot  |            |
| tof                     | 600.0              | wts    |          |            |
| nt                      | 16                 | wnt    |          |            |
| ct                      | 16                 |        |          |            |
| alock                   | Y                  |        |          |            |
| gain                    | not used           |        |          |            |
| FLAGS                   |                    |        |          |            |
| l1                      | n                  |        |          |            |
| l2                      | n                  |        |          |            |
| dp                      | Y                  |        |          |            |
| hs                      | nm                 |        |          |            |
| DISPLAY                 |                    |        |          |            |
| sp                      | -80.0              |        |          |            |
| wp                      | 4079.4             |        |          |            |
| vs                      | 214                |        |          |            |
| ac                      | 0                  |        |          |            |
| wc                      | 380                |        |          |            |
| hzmm                    | 10.74              |        |          |            |
| ls                      | 556.81             |        |          |            |
| rfl                     | 372.3              |        |          |            |
| rhp                     | 0                  |        |          |            |
| th                      | 20                 |        |          |            |
| lms                     | 100.000            |        |          |            |
| nm                      |                    |        |          |            |
| ph                      |                    |        |          |            |

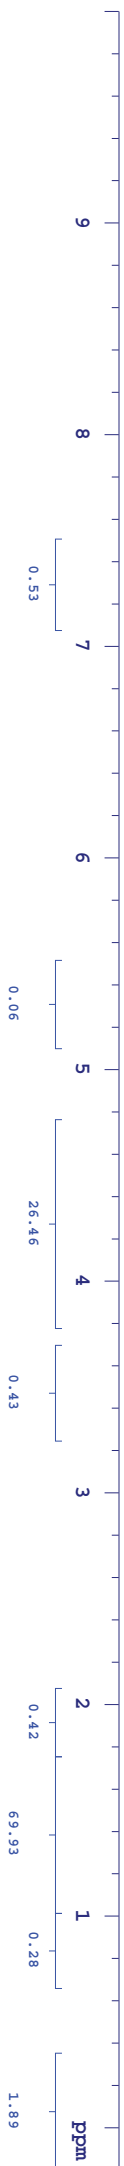

fujinami/CP3EBU  
 exp20 std13c

13C NMR (CDCl3, 100.6 MHz)  
 7c

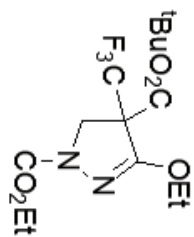

```

SAMPLE          DEC. & VT
date Dec 20 2011  df-rq 399.956
solvent CDCl3      dn      HI
file /export/home/~ dpwr 41
vnmr1/vnmrsys/data- dof  0
/fujinami/CP3EBU.c- dm
                        .fid  yyy
ACQUISITION
sfrq 100.579      dmf  11088
tn   C13          dres  9arp1
at   1.199        homo  n
np   59968        PROCESSING
sw   25000.0     lb     1.00
fb   not used    wf1file
bs   16          proc  ft
cpwr 56          fn    not used
pw   5.0         math  f
dl   0.801
tof  1000.0     weir  react
nt   4096       wexp  procp1ot
ct   4096       wbs
a1ock not used  n   wnt
gain  not used

FLAGS
I1   n
I1n  n
dP   Y
hs   mn
DISPLAY
SP   -1995.8
WP   24999.2
VS   214
vc   0
wc   380
hzmm 2.40
Is   500.00
rFl  9750.4
rFp  7753.8
th   20
fns  500.000
nm no ph
    
```

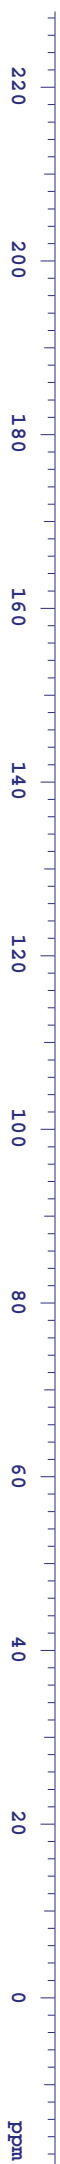

fujinami/CNR  
 exp20 std1h

SAMPLE DEC. & VT  
 date Oct 7 2011 dfreq 399.956  
 solvent CDCl3 dn HI  
 file /export/home/~ dpwr 20  
 vnmr1/vnmrsys/data- dof 0  
 /fujinami/CNR\_h.fi- dm nm  
 d dm c

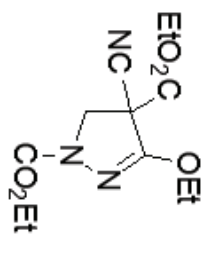

ACQUISITION  
 srfreq 399.956 dmf 200  
 tn HI dres 1.0  
 at 3.744 homo n  
 np 44928 wtfile PROCESSING  
 sw 6000.6 not used proc ft  
 fb 1 fn not used f  
 bpwr 61 match  
 pw 5.5  
 dl 1.256 werr react  
 tof 600.0 weap preplot  
 nt 16 wbs  
 ct 16 wnt  
 alock n  
 gain not used  
 FLAGS  
 l1 n  
 ln n  
 dp Y  
 hs mn  
 DISPLAY  
 sp -80.0  
 wp 4079.4  
 vs 214  
 vc 0  
 hzmm 10.74  
 fs 1082.87  
 rfl 383.1  
 rfp 0  
 th 20  
 lns 100.000  
 nm ph

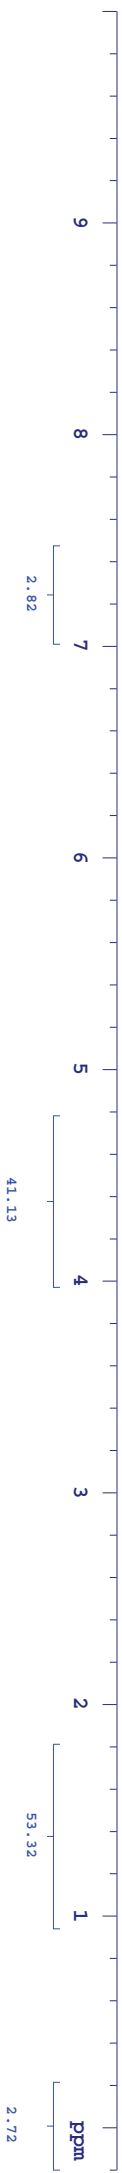

fujinami/CNR  
 exp20 std13c

13C NMR (CDCl3, 100.6 MHz)  
 7d

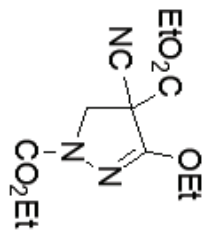

SAMPLE DEC. & VT  
 date Oct 7 2011 df-rq 399.956  
 solvent CDCl3 dn H1  
 file /export/home/~ dpwr 41  
 vnmr1/vnmrsys/data-dof 0  
 /fujinami/CNR\_c.fl - dm YYY  
 ACQUISITION d dmw  
 strq 100.579 dmf 10400  
 tn C13 dres garp1  
 at 1.199 homo n  
 np 59968 PROCESSING  
 sw 25000.0 lb 1.00  
 fb not used wfile  
 bs 16 proc ft  
 cpwr 56 fn not used  
 pw 5.0 math f  
 dl 0.801  
 tof 1000.0 weir react  
 nt 40000 wexp procp1ot  
 ct 30761 wbs  
 alock n wnt  
 gain not used  
 FLAGS  
 f1 n  
 f2 n  
 dp Y  
 hs nm  
 DISPLAY  
 sp -1993.5  
 wp 24999.2  
 vs 1072  
 sc 0  
 wc 380  
 hzmm 0.57  
 fs 500.00  
 rfl 9748.1  
 rfp 7753.8  
 th 9  
 fns 500.000  
 nm no ph

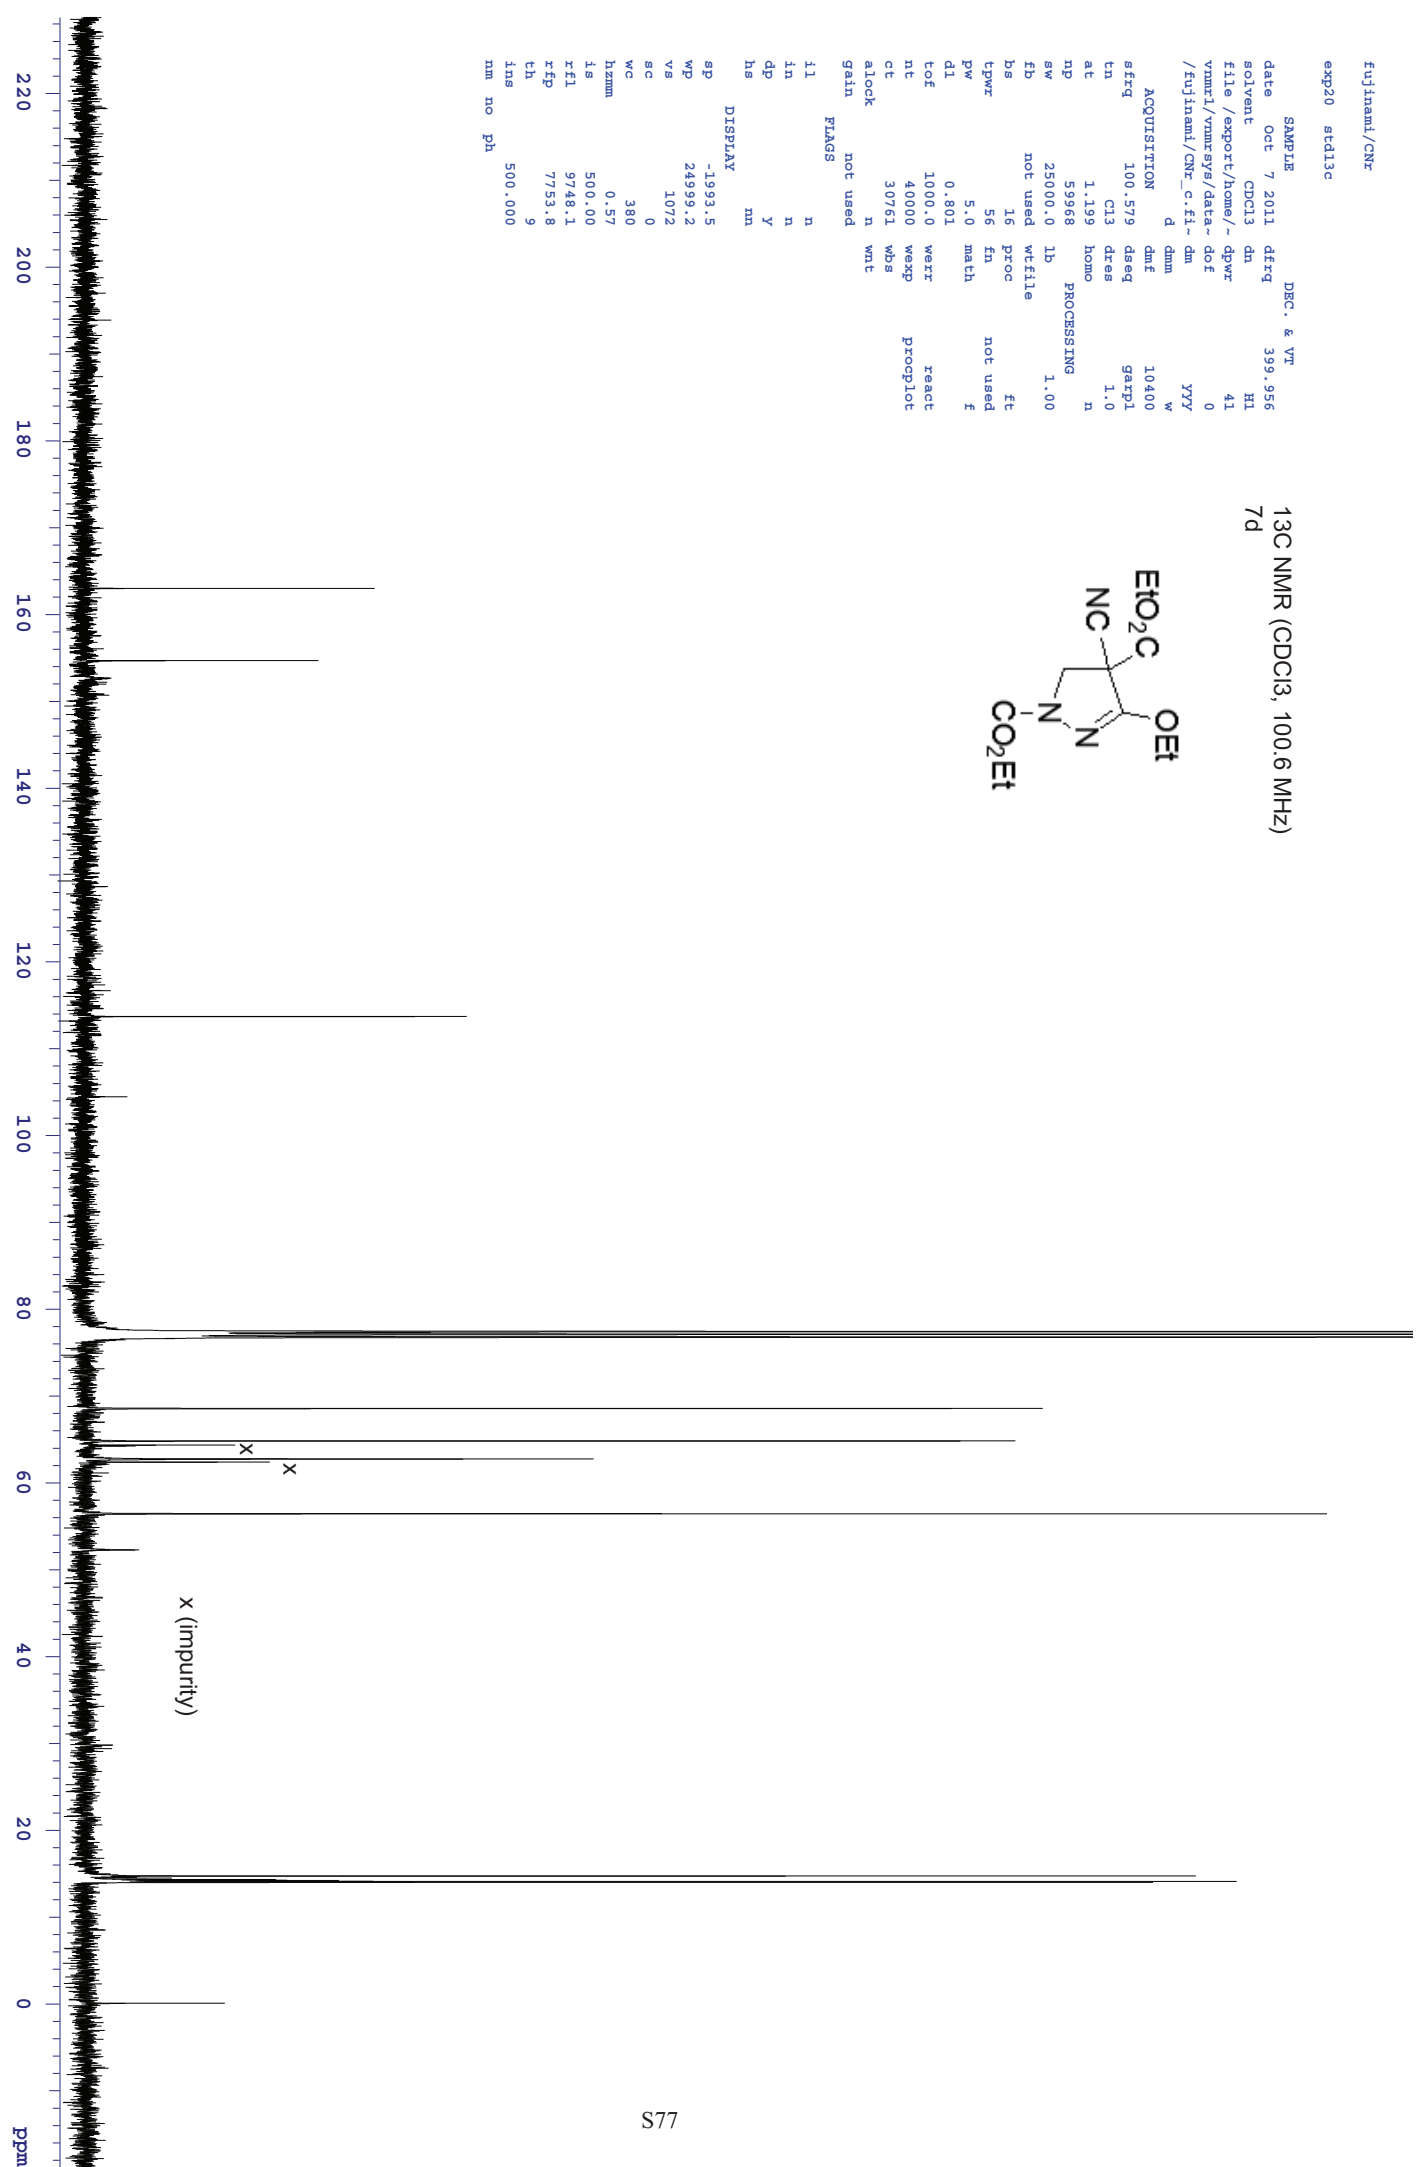

takebayashi7/dtcbu  
 exp20 std1h

<sup>1</sup>H NMR (CDCl<sub>3</sub>, 400 MHz)  
 7e

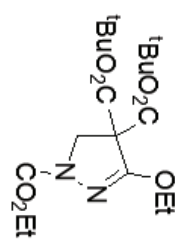

SAMPLE DEC. & VT  
 date Aug 11 2011 dfcrg 399.956 H1  
 solvent CDCl<sub>3</sub> dn H1  
 file /export/home/~ dpwr 20  
 vnmr1/vnmr1s/data- dof 0  
 /takebayashi7/dtcb- dm nm  
 u\_h.fid dm c  
 ACQUISITION  
 sfcrg 399.956 dmf 200  
 tn H1 dres 1.0  
 at 3.744 homo n  
 np 44928 PROCESSING  
 sw 6000.6 wf file  
 fb not used proc ft  
 bs 1 fn not used f  
 tpwr 61 match  
 pw 5.5  
 dl 1.256 werr react  
 tof 600.0 wearp procploc  
 nt 16 wbs  
 ct 16 wnt  
 alock n  
 gain not used  
 FLAGS  
 l1 n  
 ln n  
 dp Y  
 hs mn  
 DISPLAY  
 sp -80.0  
 wp 4079.4  
 vs 214  
 ac 0  
 wc 380  
 hzmm 10.74  
 fs 793.86  
 rfi 380.3  
 rfp 0  
 th 20  
 lns 100.000  
 nm ph

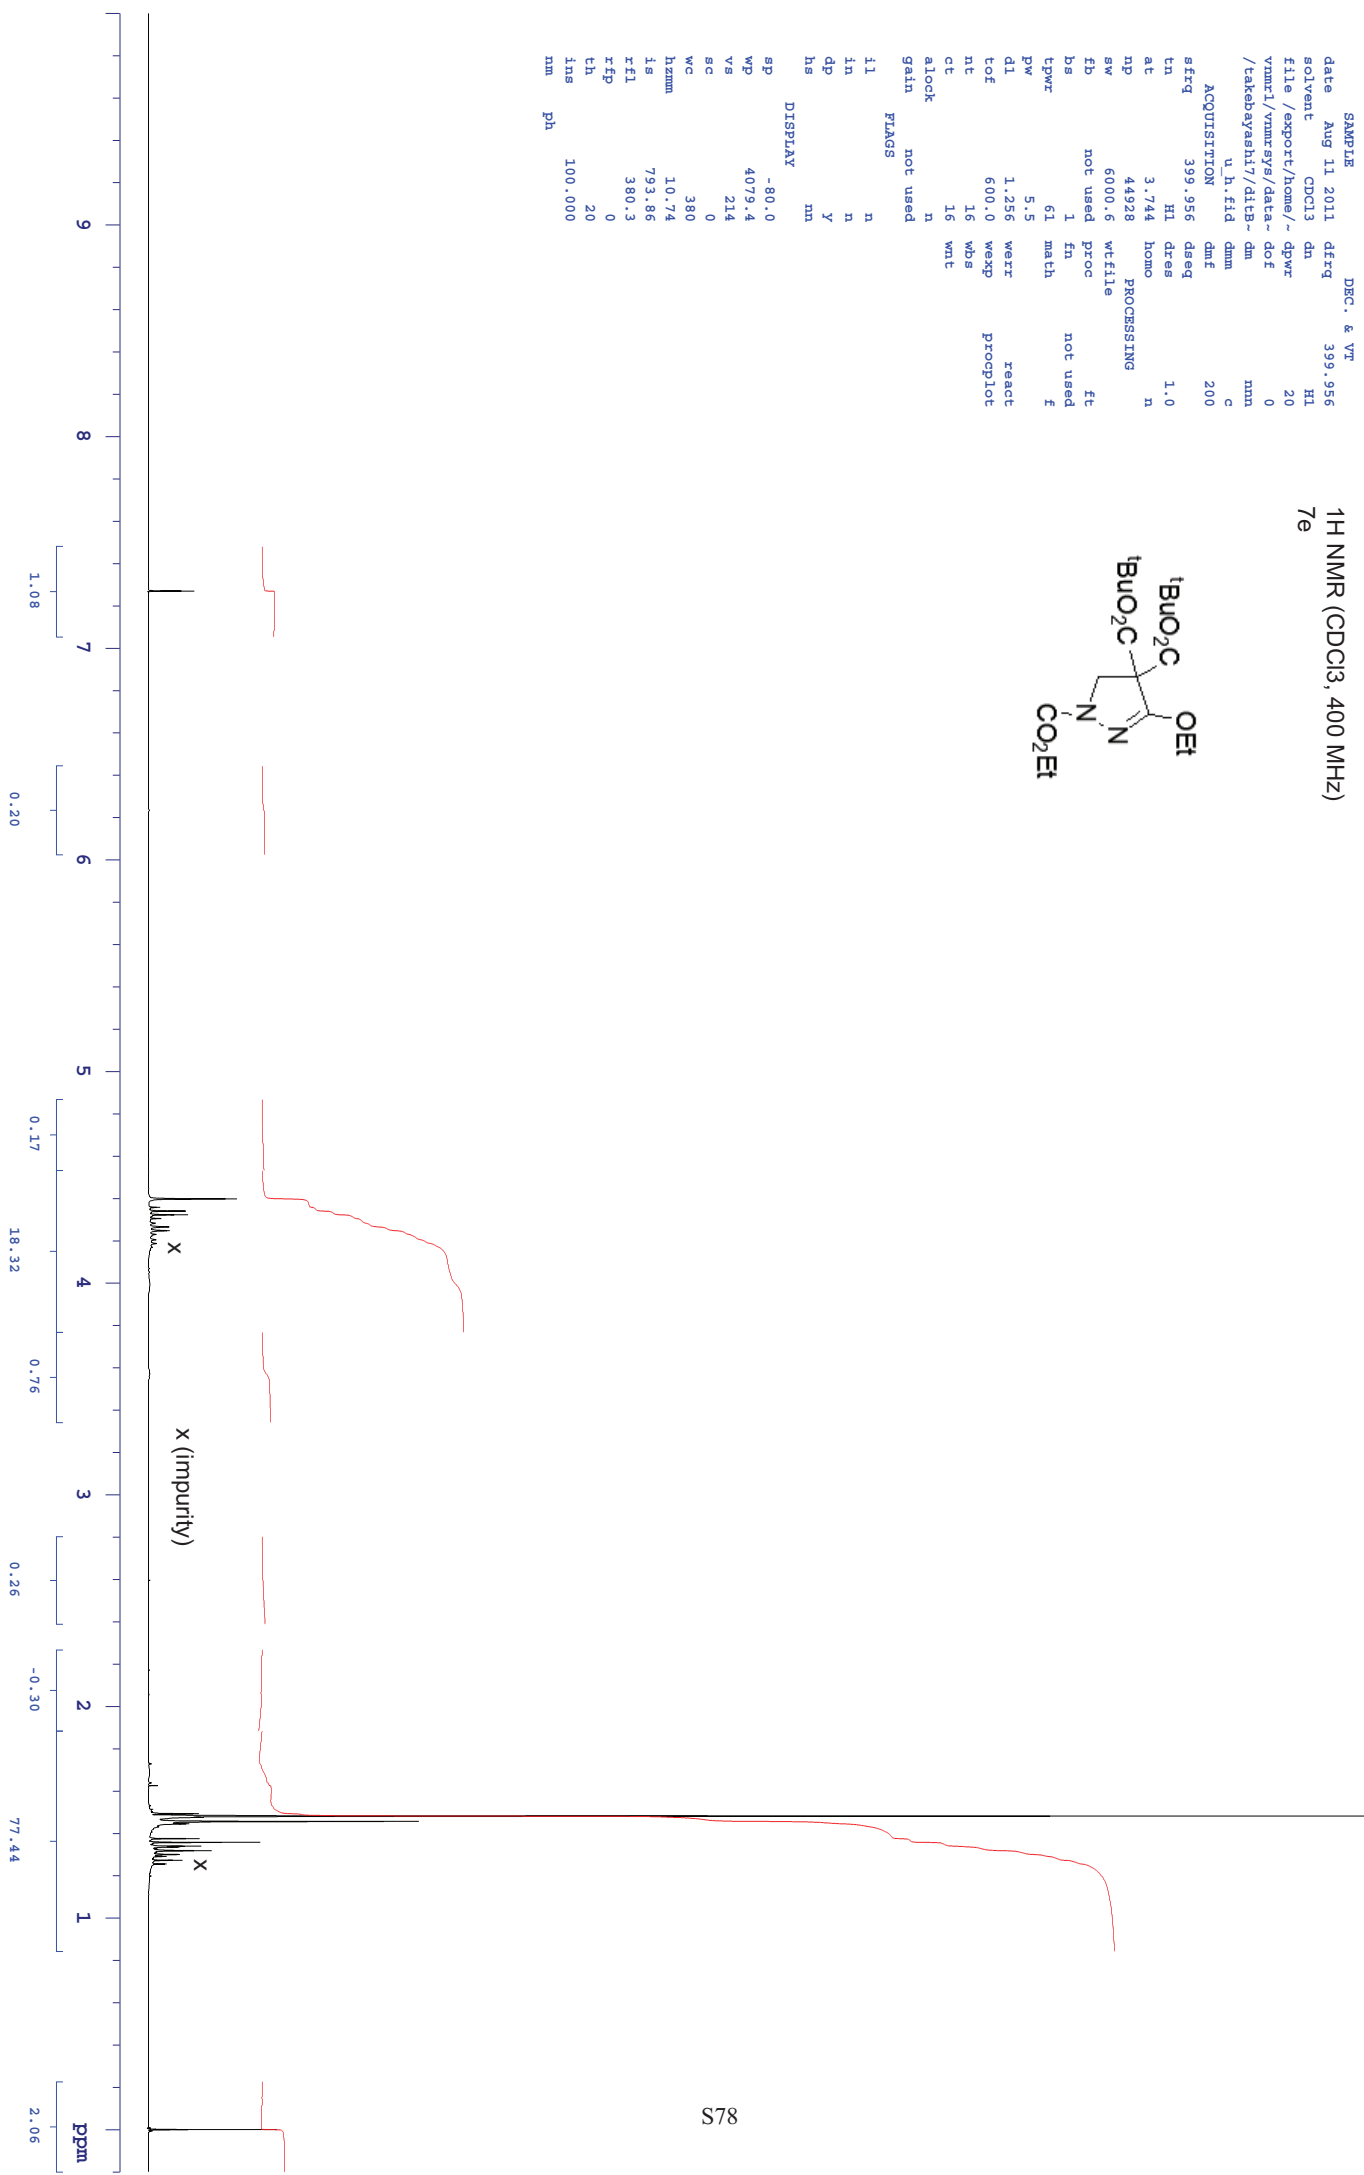

takebayashi7/dltbu  
 exp20 std13c

SAMPLE DEC. & VT  
 date Aug 11 2011 dfreq 399.956  
 solvent CDCl3 dn H1  
 file /export/home/~ dpwr 41  
 vnmr1/vnmrsys/data-dof 0  
 /takebayashi7/dltb-dm  
 u\_c.fid dm

13C NMR (CDCl3, 100.6 MHz)  
 7e

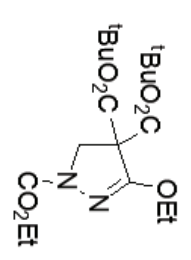

ACQUISITION  
 freq 100.579 dmf 10400  
 tn Cl3 dres 9arp1  
 at 1.199 homo n  
 np 59968 PROCESSING  
 sw 25000.0 lb 1.00  
 fb not used wfile  
 bs 16 proc ft  
 cpwr 56 fn not used  
 pw 5.0 math f  
 dl 0.801  
 tof 1000.0 weir react  
 nt 4096 wekp procp1ot  
 ct 4096 wbs  
 alock n wnt  
 gain not used  
 FLAGS  
 l1 n  
 ln n  
 dp y  
 hs mn  
 DISPLAY  
 sp -1992.7  
 wp 24999.2  
 vs 214  
 sc 0  
 wc 380  
 hzmm 0.69  
 ls 500.00  
 rfl 9747.3  
 rfp 7753.8  
 th 48  
 fns 500.000  
 nm no ph

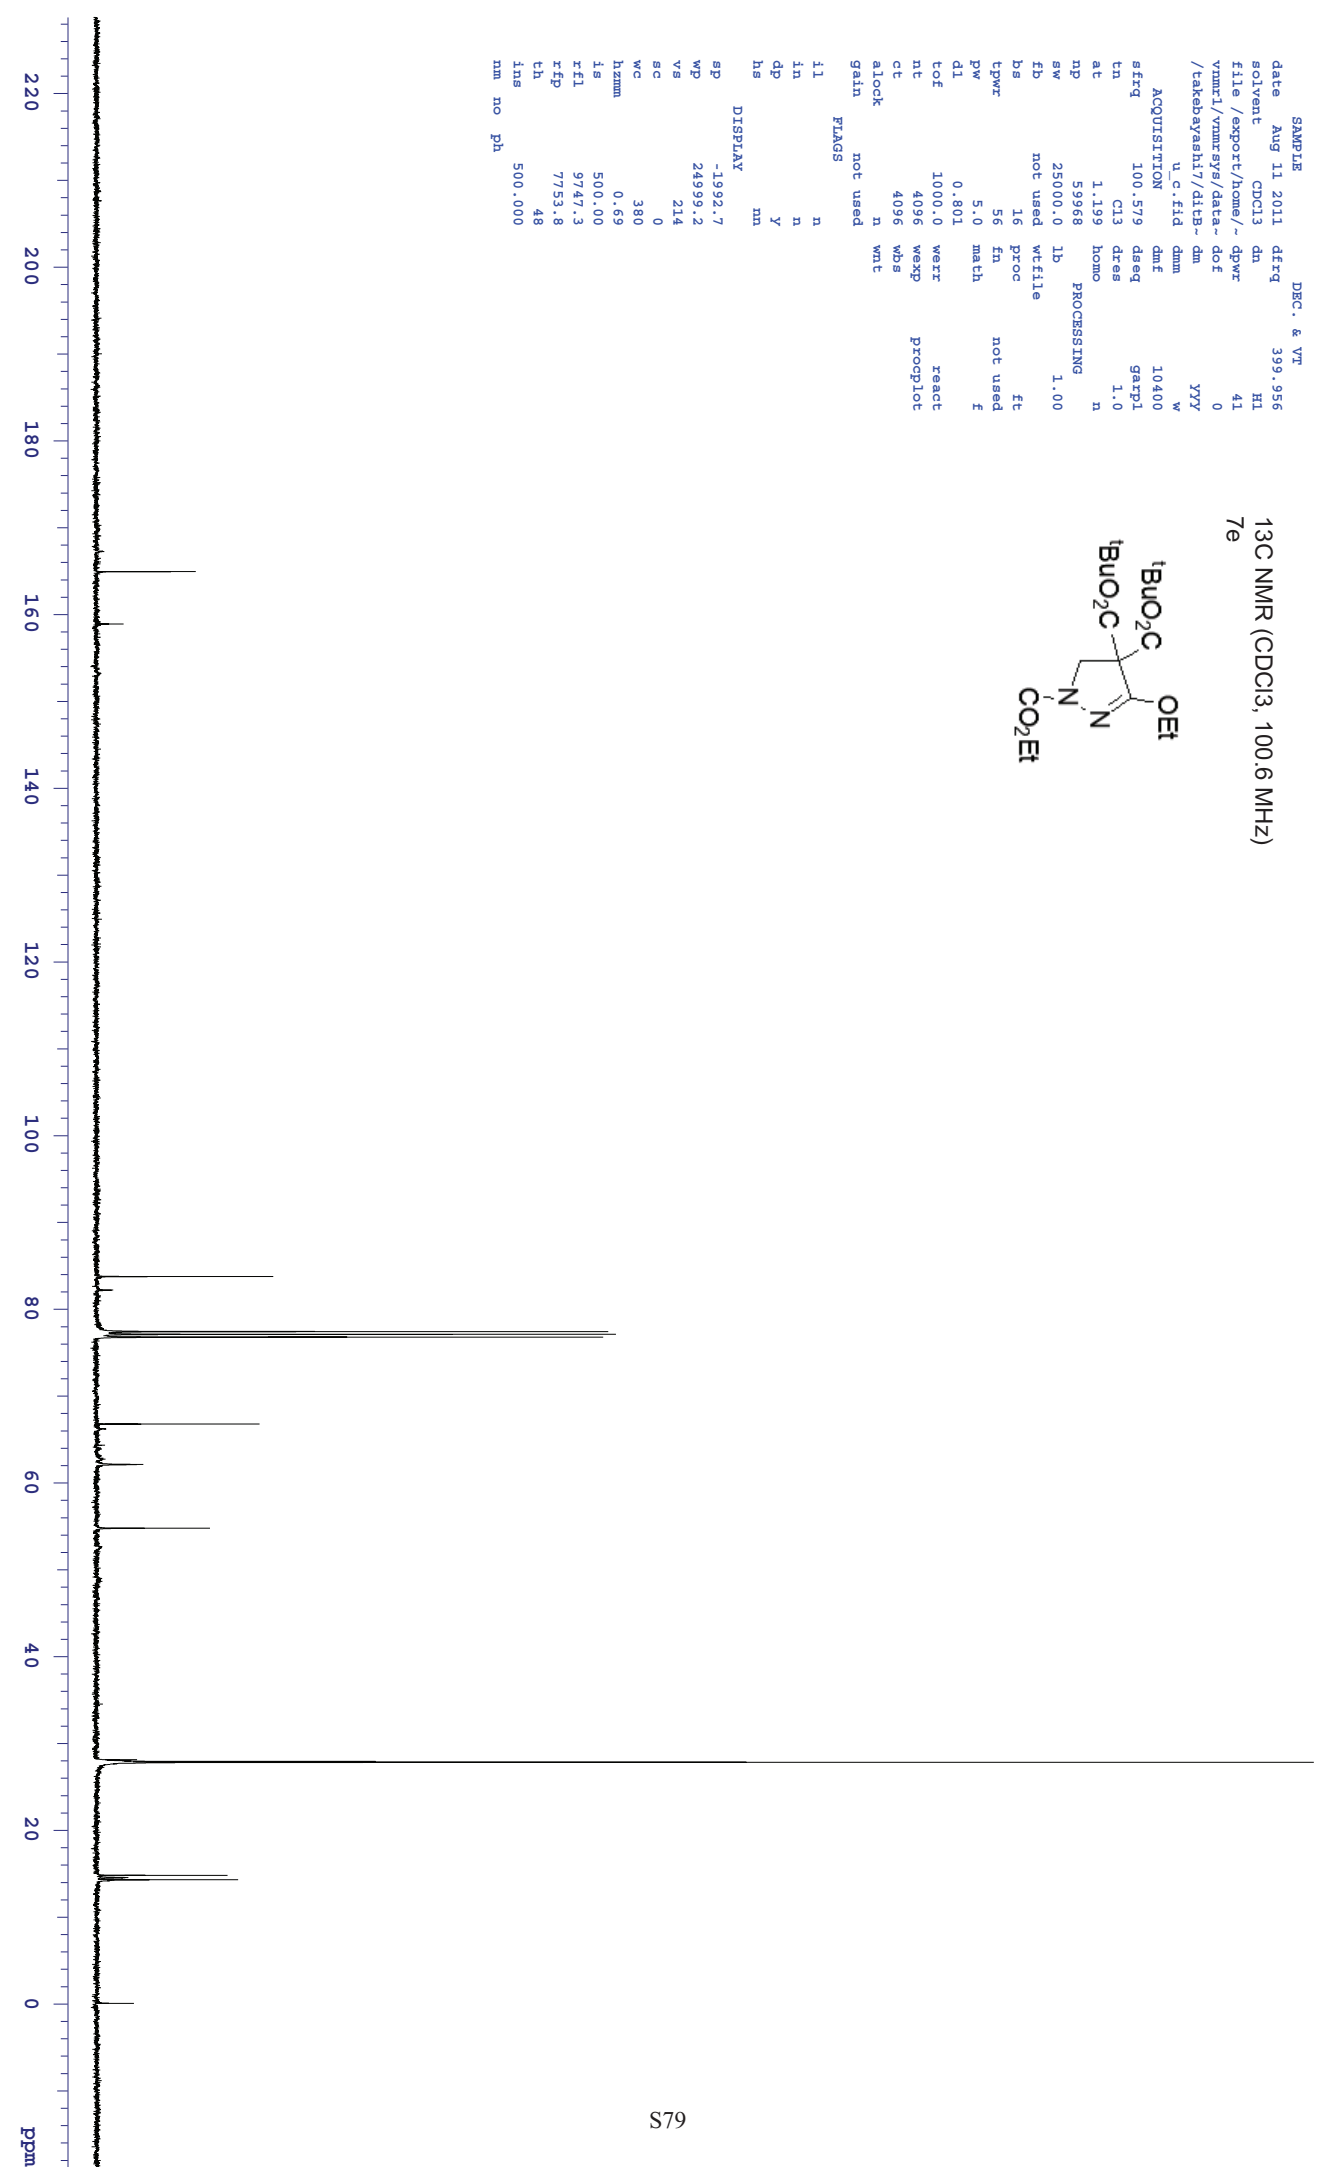

takebayashi7/dtcbuwr  
 exp10 std1h

<sup>1</sup>H NMR (CDCl<sub>3</sub>, 400 MHz)  
 7f

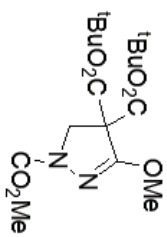

SAMPLE DEC. & VT  
 date Aug 23 2011 dfreq 399.956  
 solvent CDCl3 dn HI  
 file /export/home/~ dpwr 20  
 vnmr1/vnmr1s/data- dof 0  
 /takebayashi7/dtcb- dm nm  
 uMer\_h.fid dm c  
 ACQUISITION dmf 200  
 srfq 399.956 dresq  
 tn HI dres 1.0  
 at 3.744 homo n  
 np 44928 PROCESSING  
 sw 6000.6 wfile  
 fb not used proc ft  
 bs 16 fn not used f  
 tpwr 61 mch  
 pw 5.5  
 dl 1.256 werr react  
 tof 600.0 weap wft  
 nt 16 wbs  
 ct 16 wnt  
 alock n  
 gain not used  
 FLAGS  
 l1 n  
 ln n  
 dp Y  
 hs m  
 DISPLAY  
 sp -80.0  
 wp 4079.4  
 vs 214  
 ac 0  
 wc 380  
 hzmm 10.74  
 ls 671.74  
 rfl 370.3  
 rfp 0  
 th 5  
 lns 100.000  
 nm ph

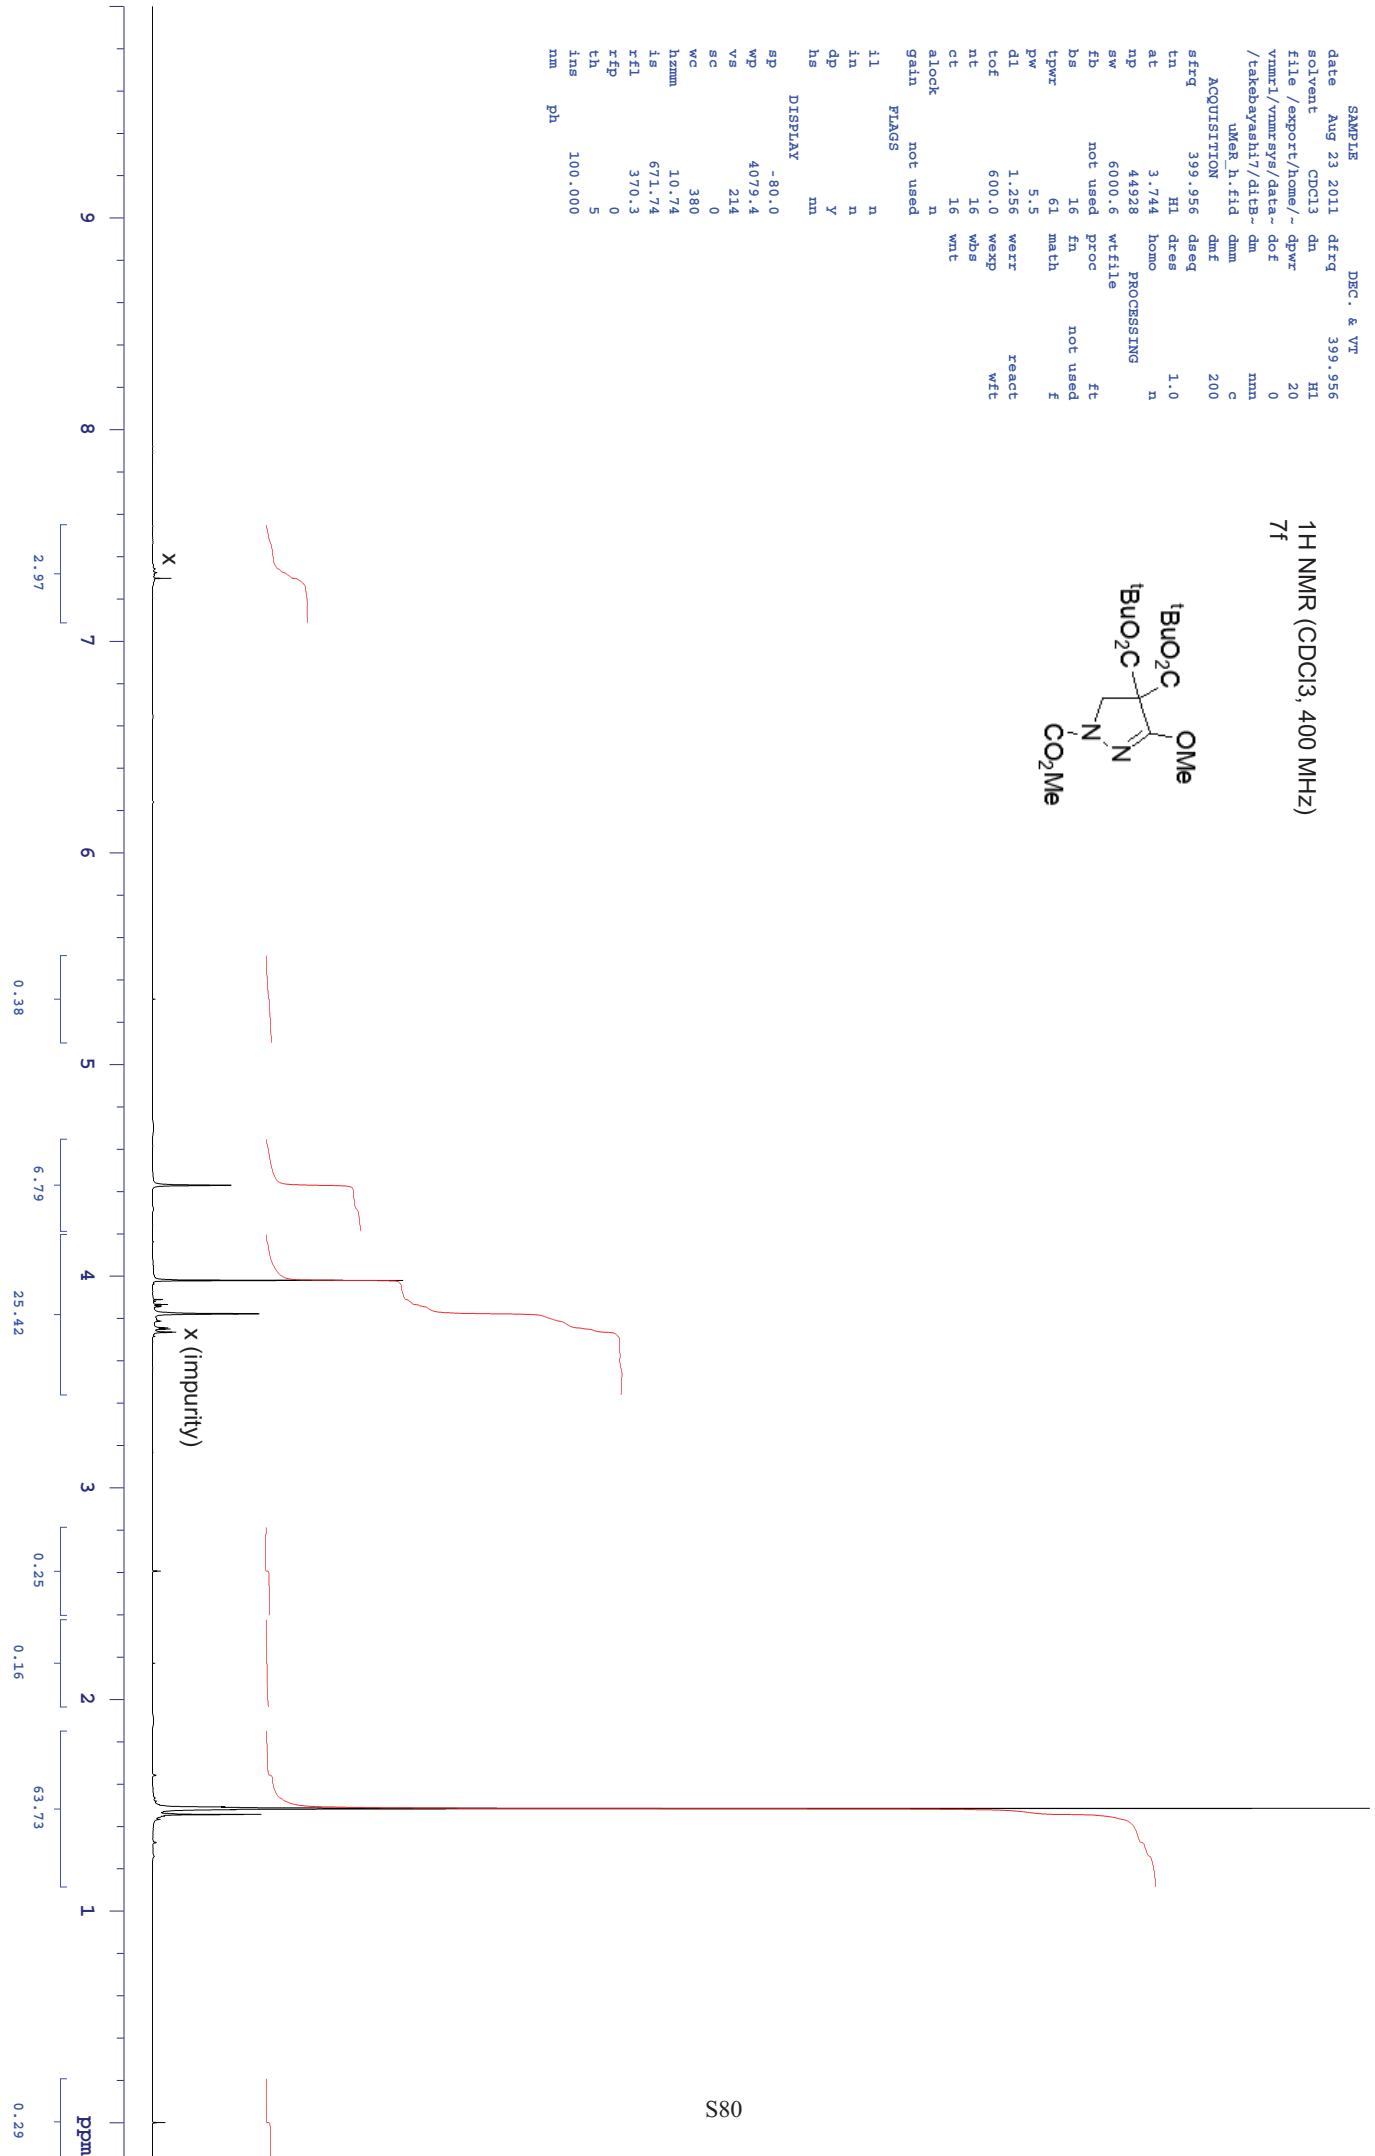



takebayashi7/dltbumer  
 exp10 std13c

13C NMR (CDCl3, 100.6 MHz)  
 7f

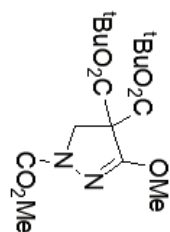

|                     |                        |            |          |           |         |
|---------------------|------------------------|------------|----------|-----------|---------|
| date                | Aug 23 2011            | dfreq      | 399.956  | DEC. & VT | 399.956 |
| solvent             | CDCl3                  | dn         |          |           | H1      |
| file                | /export/home/~ dpwr    |            | 41       |           |         |
| ymm-1               | /ymm-1/ymm-1/data- dof |            | 0        |           |         |
| /takebayashi7/dltb- |                        |            |          |           |         |
| umer_c.fid          | dm                     |            | YYY      |           |         |
| ACQUISITION         |                        |            |          |           |         |
| strq                | 100.579                | dme        | 10400    |           |         |
| tn                  | C13                    | dseq       | 9arp1    |           |         |
| at                  | 1.199                  | homo       | 1.0      |           |         |
| np                  | 59968                  | PROCESSING |          |           |         |
| sw                  | 25000.0                | lb         | 1.00     |           |         |
| fb                  | not used               | wfile      |          |           |         |
| bs                  | 16                     | proc       | ft       |           |         |
| cpwr                | 56                     | fn         | not used |           |         |
| pw                  | 5.0                    | math       | F        |           |         |
| dl                  | 0.801                  |            |          |           |         |
| tof                 | 1000.0                 | werr       | react    |           |         |
| nt                  | 8192                   | wexp       | procp1ot |           |         |
| ct                  | 8192                   | wbs        |          |           |         |
| alock               | not used               | n          | wnt      |           |         |
| gain                | not used               |            |          |           |         |
| fl                  | n                      | FLNGS      |          |           |         |
| fln                 | n                      |            |          |           |         |
| dp                  | Y                      |            |          |           |         |
| hs                  | nn                     |            |          |           |         |
| DISPLAY             |                        |            |          |           |         |
| sp                  | -1998.1                |            |          |           |         |
| wp                  | 24999.2                |            |          |           |         |
| vs                  | 214                    |            |          |           |         |
| sc                  | 0                      |            |          |           |         |
| wc                  | 380                    |            |          |           |         |
| h2mm                | 0.41                   |            |          |           |         |
| fs                  | 500.00                 |            |          |           |         |
| rfl                 | 9753.7                 |            |          |           |         |
| rfp                 | 7753.8                 |            |          |           |         |
| th                  | 2                      |            |          |           |         |
| hns                 | 500.000                |            |          |           |         |
| nm no               | ph                     |            |          |           |         |

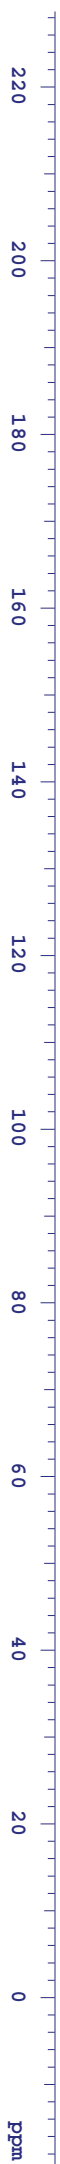

maenaka/MeEtCC  
 exp20 std1h

1H NMR (CDCl3, 400 MHz)  
 10

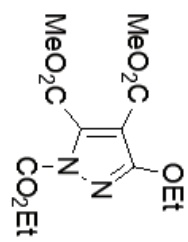

SAMPLE DEC. & VT  
 date Dec 22 2011 dfreq 399.956 H1  
 solvent CDCl3 dn H1  
 file /export/home/~ dpwr 20  
 vnmr1/vnmrsys/data- dof 0  
 /maenaka/MeEtCC h. - dm mmn  
 f1d dm c  
 ACQUISITION  
 sfreq 399.956 dmf 200  
 tn H1 dres 1.0  
 at 3.744 homo n  
 np 44928 PROCESSING  
 sw 6000.6 wfile  
 fb not used proc ft  
 bs 1 fn not used f  
 tpwr 61 match  
 pw 5.5  
 dl 1.256 werr react  
 tof 600.0 weap preplot  
 nt 16 wbs  
 ct 16 wnt  
 alock n  
 gain not used  
 FLAGS  
 l1 n  
 ln n  
 dp y  
 hs mn  
 DISPLAY  
 sp -80.0  
 wp 4079.4  
 vs 214  
 ac 0  
 wc 380  
 hzmm 10.74  
 ls 650.76  
 rfl 376.0  
 rfp 0  
 th 20  
 lns 100.000  
 nm ph

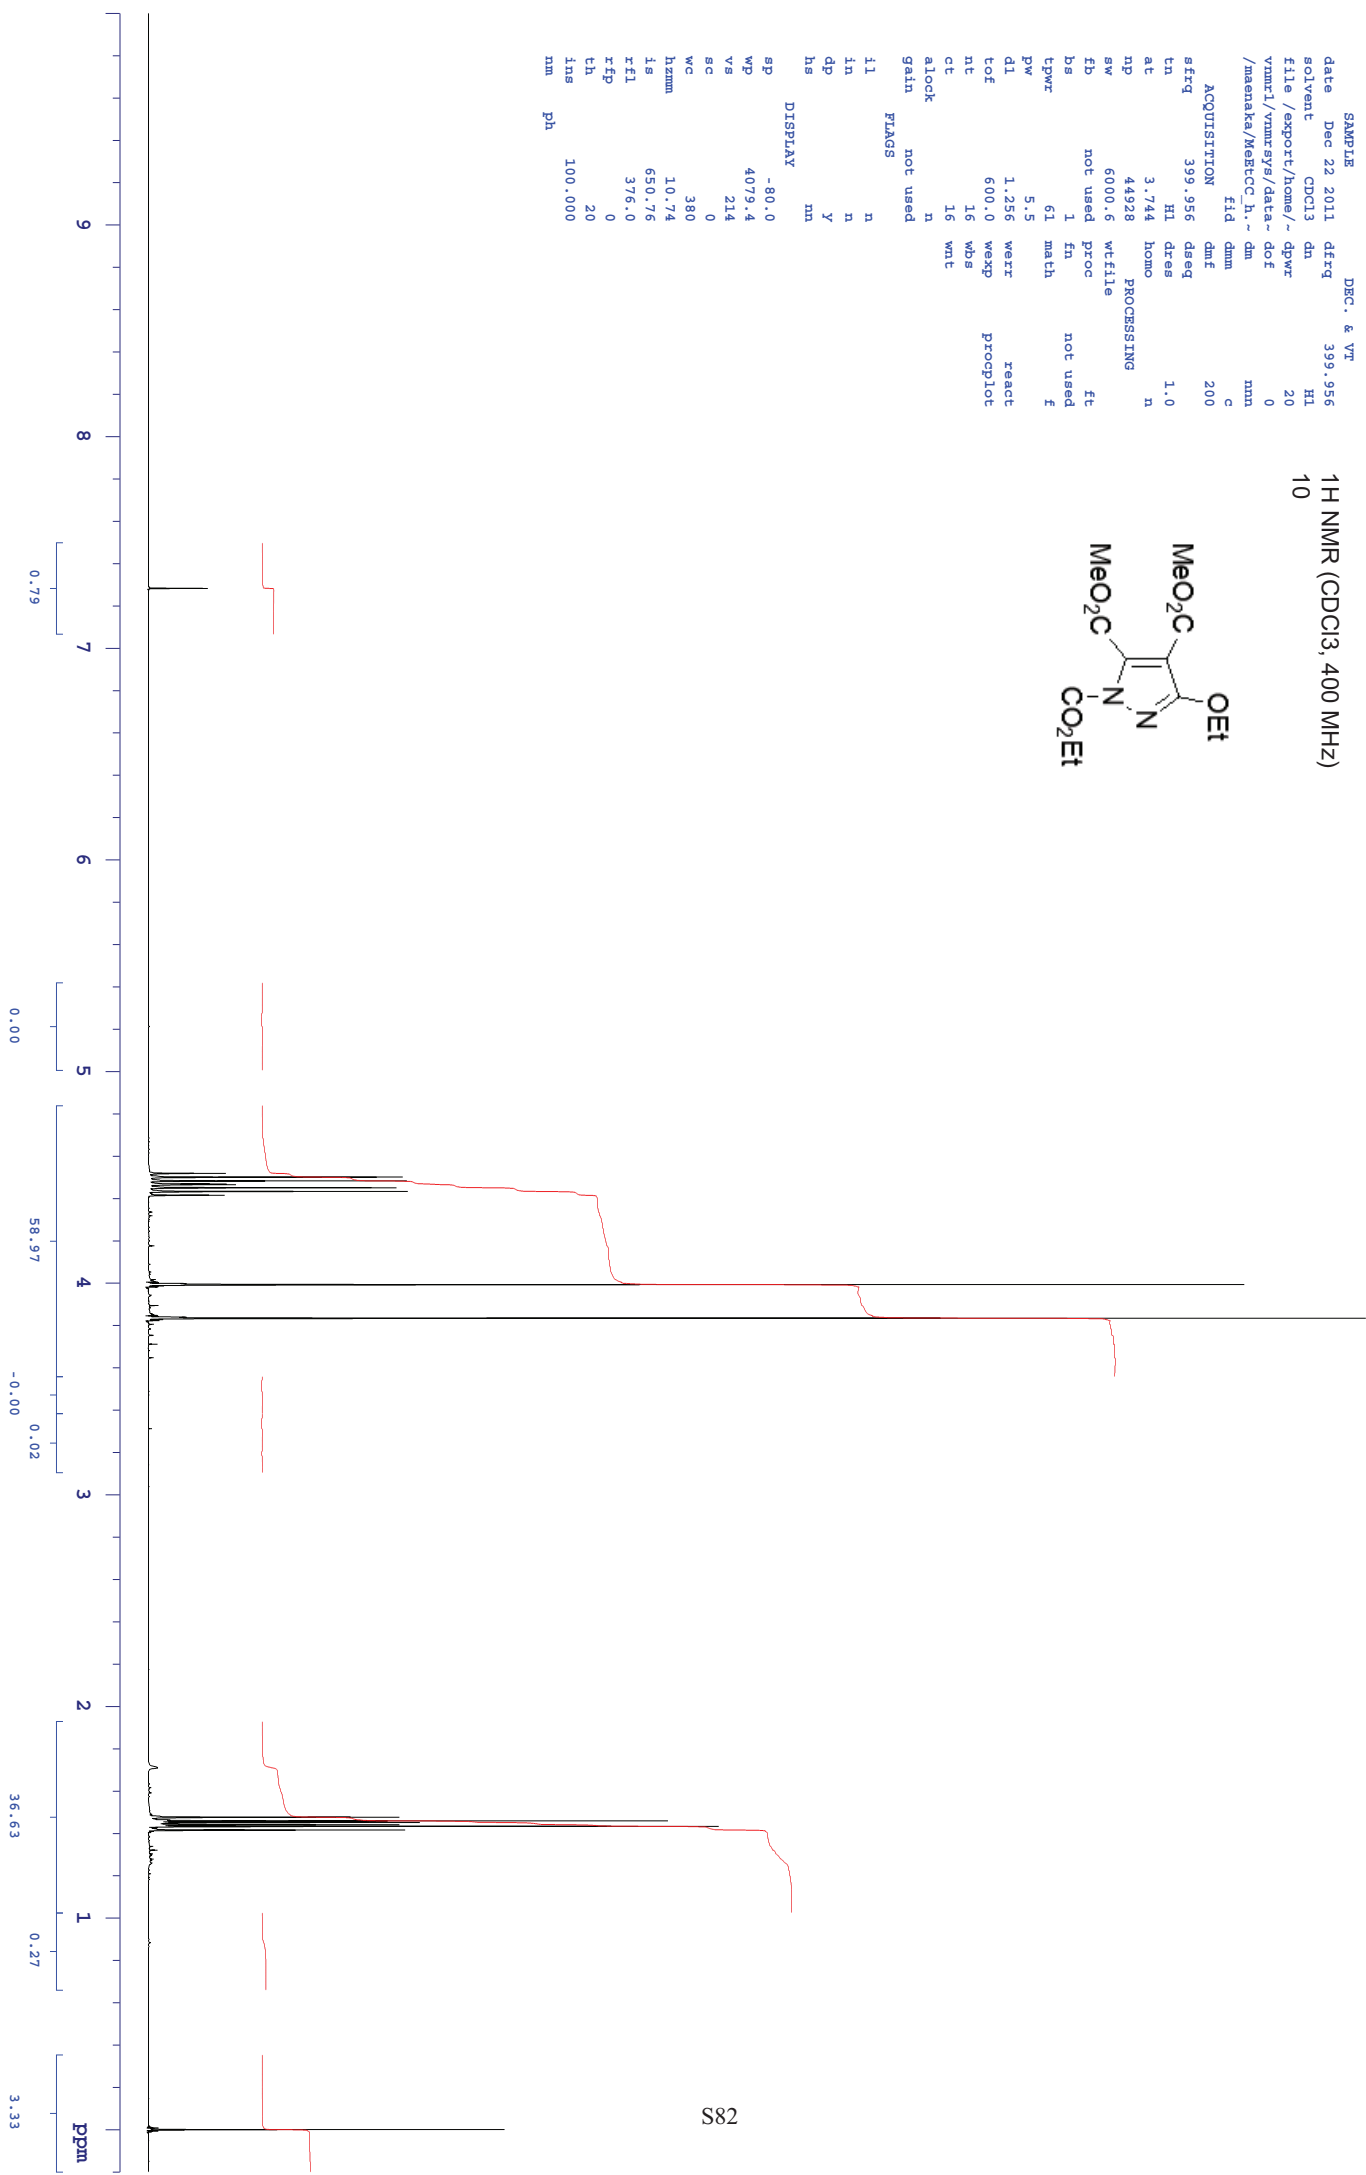

maenaka/MeEtCC  
 exp20 std13c

13C NMR (CDCl3, 100.6 MHz)  
 10

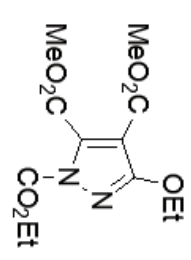

SAMPLE DEC. & VT  
 date Dec 22 2011 dfrrq 399.956 H1  
 solvent CDCl3 dn  
 file /export/home/~ dpwr 41  
 vnmr1/vnmrsys/data- dof 0  
 /maenaka/MeEtCC c.- dm  
 /maenaka/MeEtCC c.- dm YYY w

ACQUISITION  
 strq 100.579 dmf 11088  
 tn C13 dres 9arp1 1.0  
 at 1.199 homo n  
 np 59968 PROCESSING 1.00  
 sw 25000.0 lb  
 fb not used wfile  
 bs 16 proc ft  
 cpwr 56 fn not used  
 pw 5.0 math f  
 dl 0.801  
 tof 1000.0 weir react  
 nt 1024 wexp proplot  
 ct 1024 wbs  
 alock n wnt  
 gain not used

FLAGS  
 f1 n  
 f2 n  
 dp y  
 hs m

DISPLAY  
 sp -1996.5  
 wp 24999.2  
 vs 214  
 sc 0  
 wc 380  
 hzmm 0.45  
 fs 500.00  
 rfl 9751.1  
 rfp 7753.8  
 th 20  
 fns 500.000  
 nm no ph

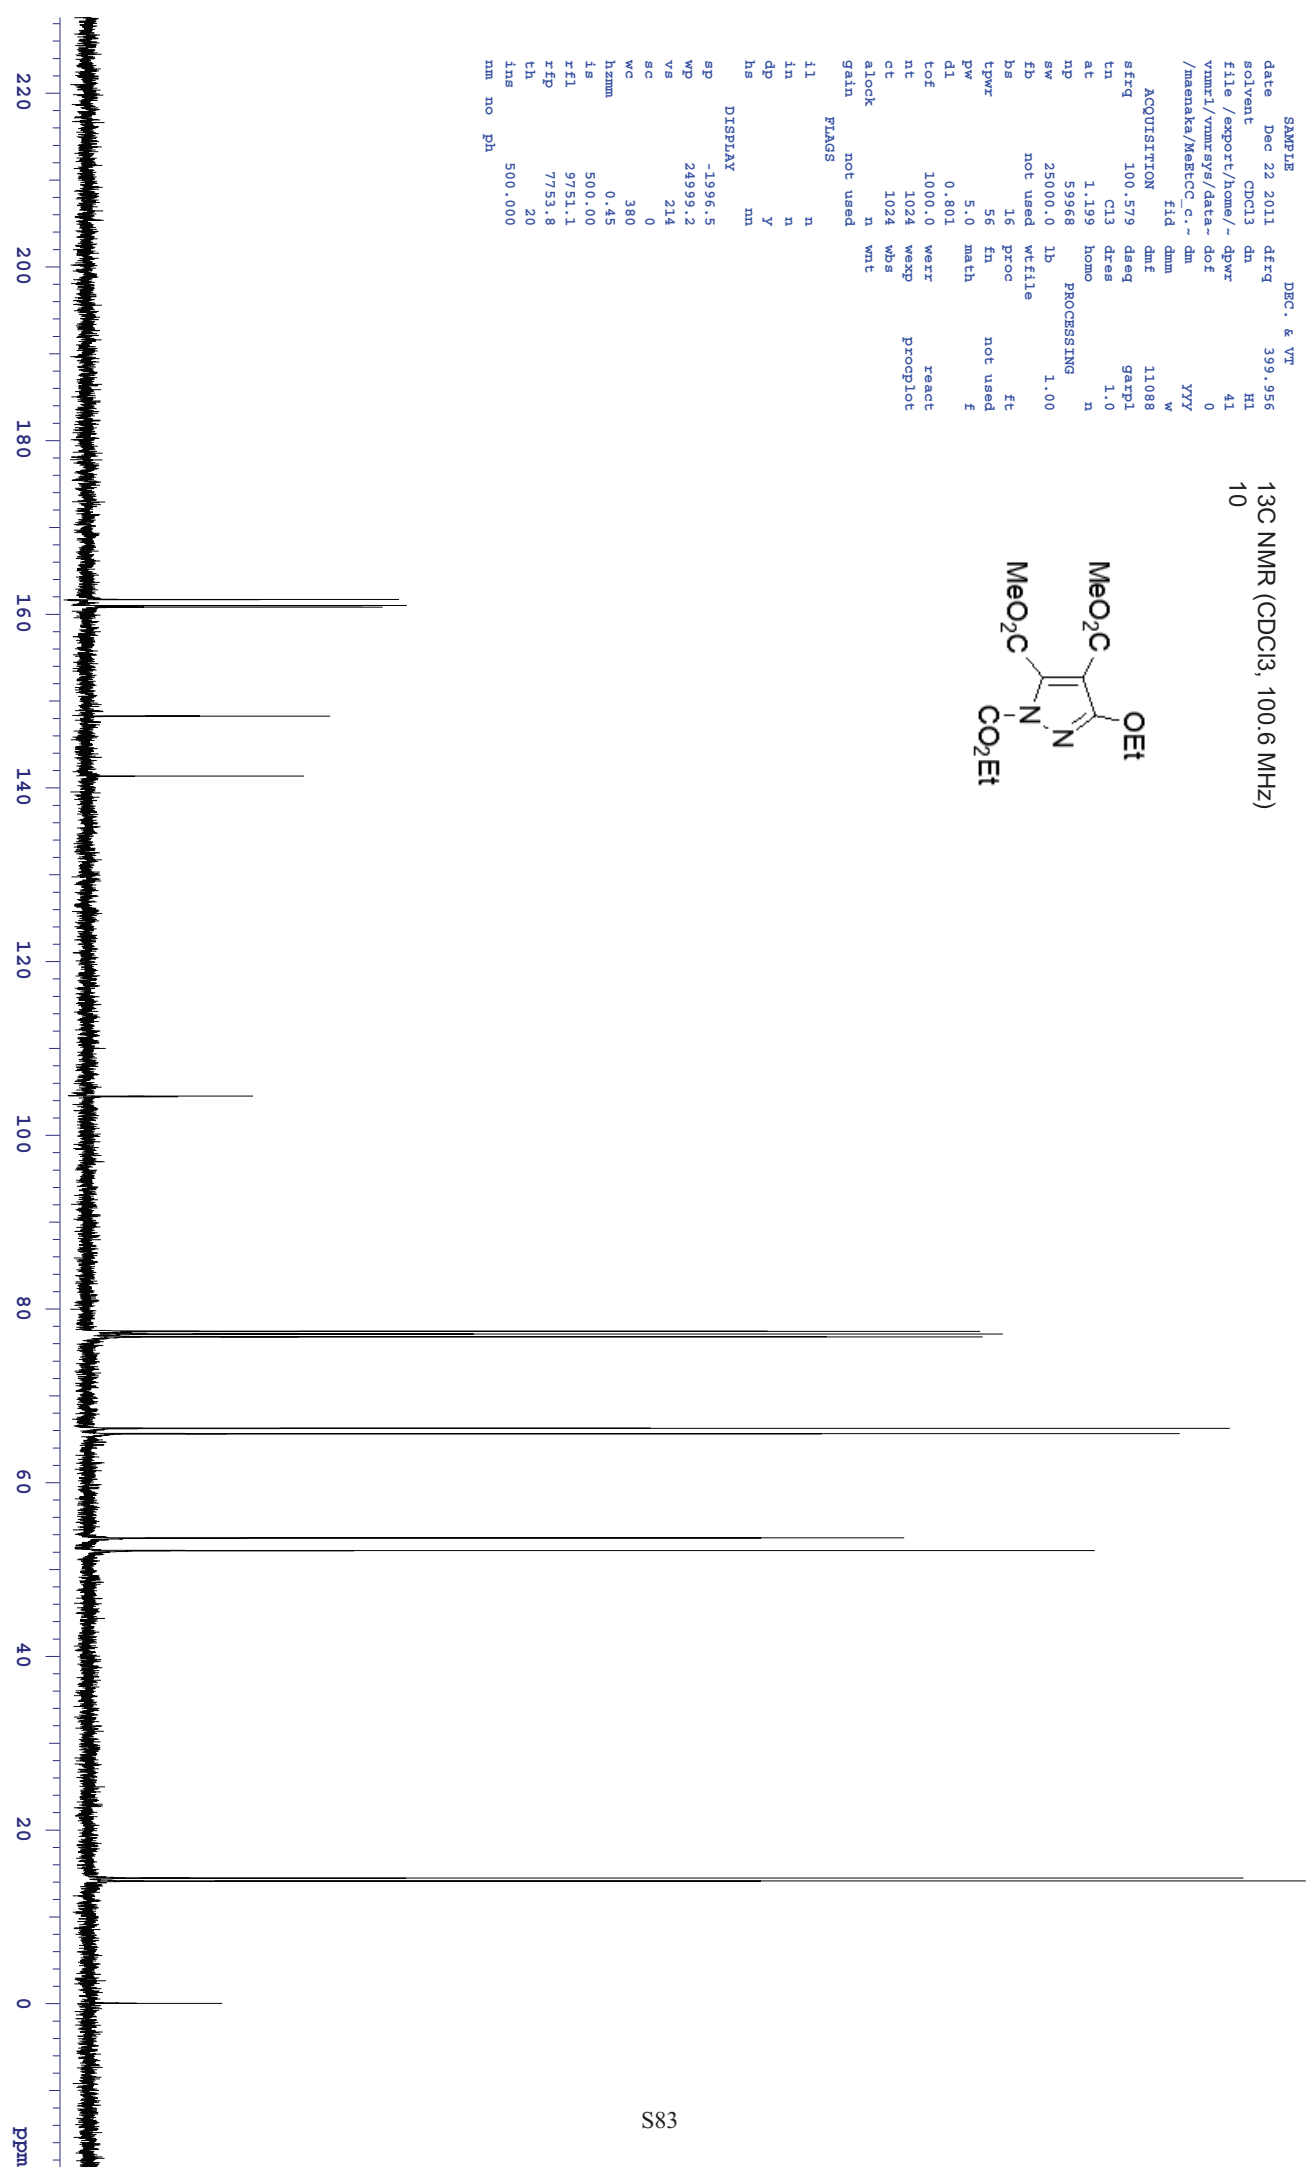

takebayashi17/deco2Pyr

exp10 std1h

<sup>1</sup>H NMR (CDCl<sub>3</sub>, 400 MHz)  
 11

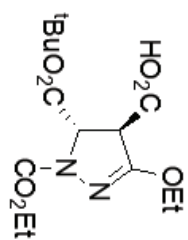

```

SAMPLE          DEC. & VT
date   Mar 24 2012   df:q   399.956
solvent CDCl3      dn      HI
file   /export/home/~ dpwr   20
vnmr1/vnmr1s/data- dof     0
/takebayashi17/deco- dm
      2Pyr_h.fid  dm
ACQUISITION
sfrq   399.956   dmf   200
tn     HI dres   1.0
at     3.744   homo   n
np     44928   wtfile  PROCESSING
sw     6000.6   react
fb     not used   proc   ft
bs     1   fn   not used   f
tpwr   61   match
pw     5.5
dl     1.256   weir
tof    600.0   weap   react
nt     16   wbs
ct     16   wnt
alock  not used
gain   not used
FLAGS
l1     n
l2     n
dp     Y
hs     mn
DISPLAY
sp     -80.0
wp     4079.4
vs     214
sc     0
wc     380
hzmm   10.74
ls     749.41
rf1    379.6
rfp    0
th     20
fns    100.000
nm
    
```

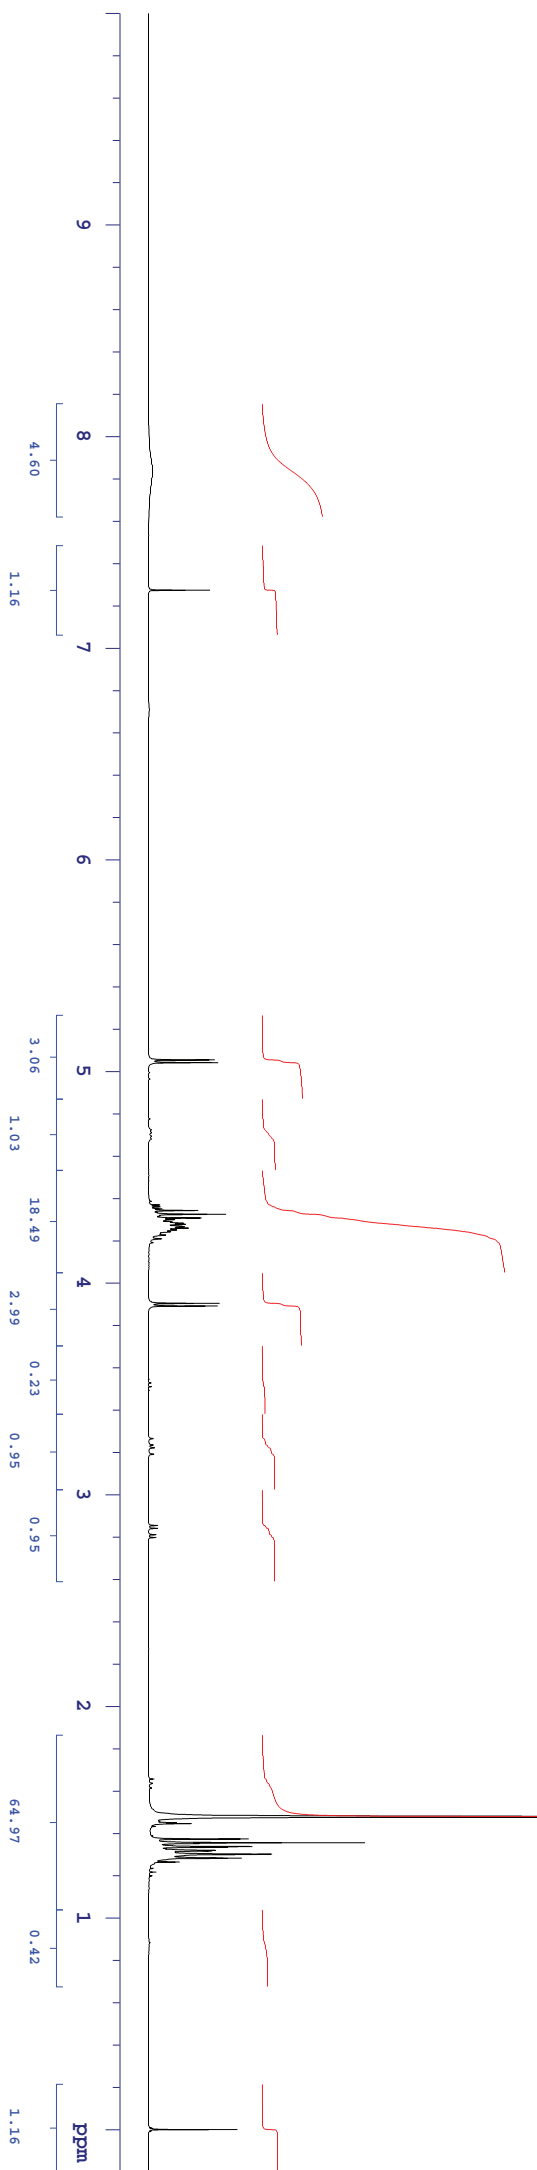

matlcko/Messter  
 exp10 std1h

1H NMR (CDCl3, 400 MHz)  
 12

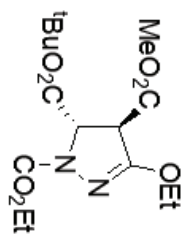

```

SAMPLE          DEC. & VT
date May 3 2012  dfc  399.956
solvent CDCl3    dn      HI
file /export/home/~ dpwr  20
vnmr1/vnmrsys/data- dof  0
/matlcko/Messter h- dm   mm
                .fid   mm
ACQUISITION
strq  399.956    dmE    200
tn     HI dres  1.0
at     3.744 homo  n
np     44928    wtfile  PROCESSING
sw     6000.6  wf       F
fb     not used proc   ft
bs     1        fn     not used
tpwr   61      match  F
pw     5.5
dl     1.256  werr    react
tcf    600.0  wearp   preplot
nt     16     wbs
ct     16     wnt
alock  not used
gain   not used
FLAGS
l1     n
l1n    n
dp     Y
hs     mn
DISPLAY
sp     -80.0
wp     4079.4
vs     214
ac     0
wc     380
hzmm   10.74
ls     927.41
rf1    383.3
rfp    0
th     20
fns    100.000
nm
    ph
    
```

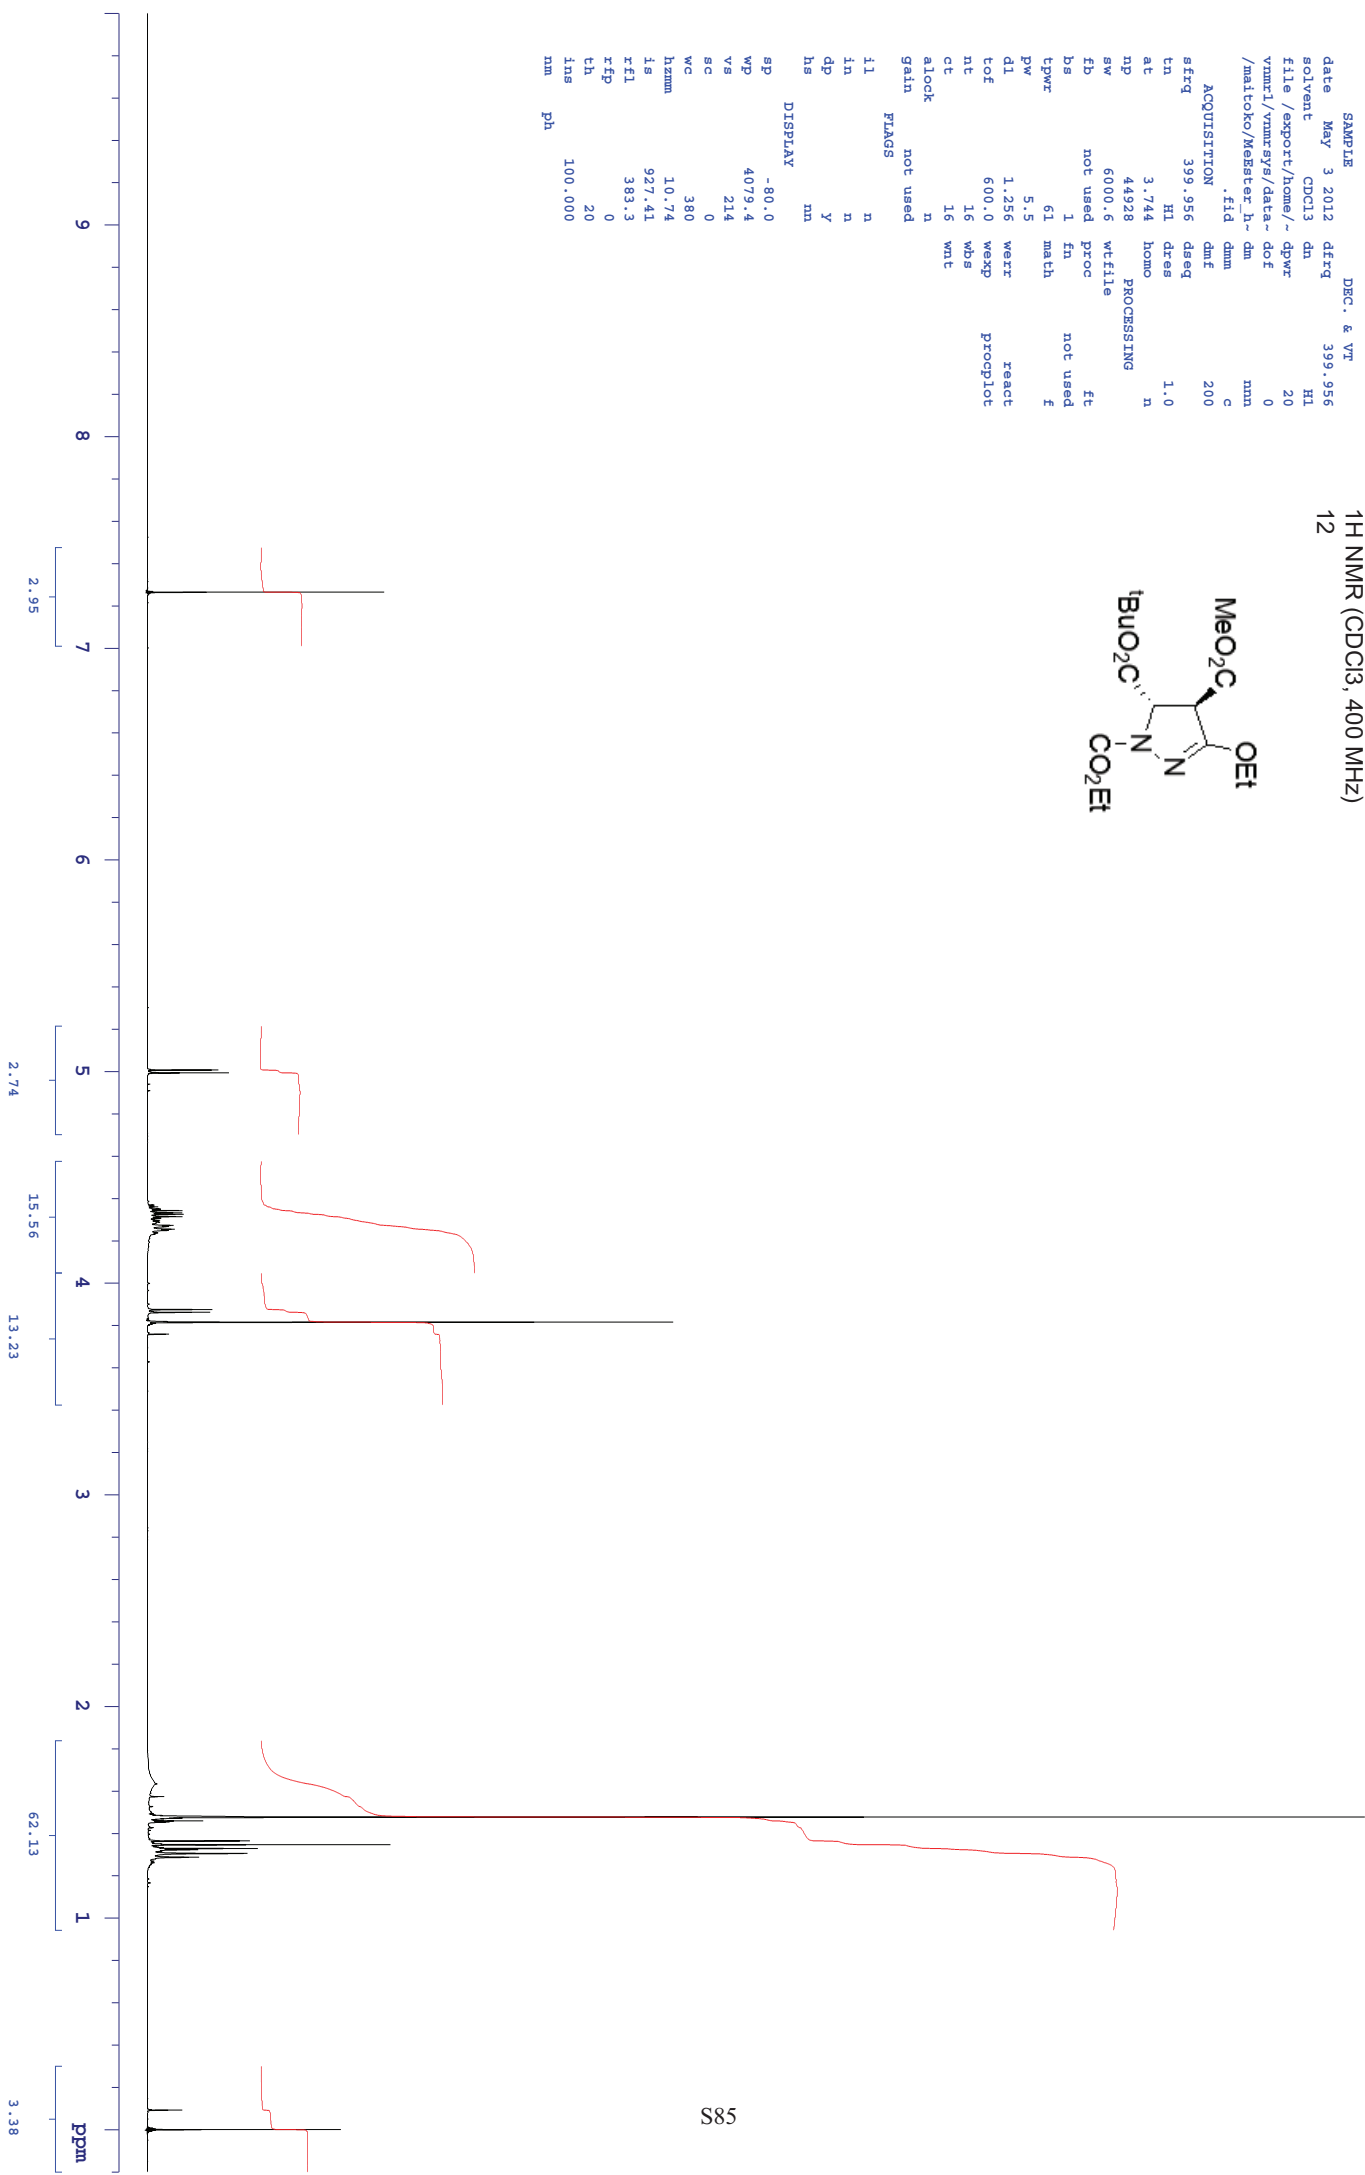

matlcko/MeSterzB  
 exp10 std13c

13C NMR (CDCl3, 100.6 MHz)  
 12

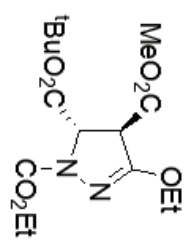

SAMPLE DEC. & VT  
 date May 4 2012 dfreq 399.956  
 solvent CDCl3 dn H1  
 file /export/home/~ dpwr 41  
 vnmr1/vnmrsys/data- dof 0  
 /matlcko/MeSterzB - dm YYY  
 c.fid dm w  
 ACQUISITION  
 freq 100.579 dmf 11088  
 tn C13 dres garp1 1.0  
 at 1.199 homo n  
 np 59968 PROCESSING  
 sw 25000.0 lb 1.00  
 fb not used wfile  
 bs 16 proc ft  
 cpwr 56 fn not used  
 pw 5.0 math f  
 dl 0.801  
 tof 1000.0 weir react  
 nt 4000 weap procploc  
 ct 40000 wbs  
 alock n wnt  
 gain not used  
 FLAGS  
 f1 n  
 f2 n  
 dp y  
 hs m  
 DISPLAY  
 sp -1992.7  
 wp 24999.2  
 vs 230  
 sc 0  
 wc 380  
 hzmm 0.37  
 fs 500.00  
 rfl 9747.3  
 rfp 7753.8  
 th 14  
 fns 500.000  
 nm no ph

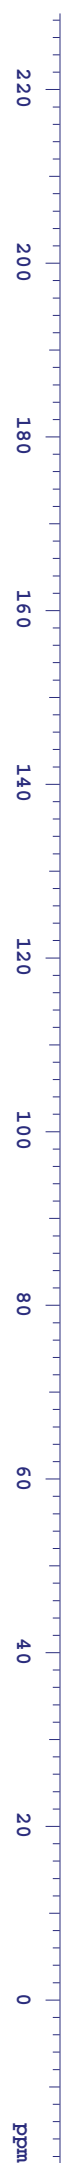

takebayashi17/deco2Pyr3D

exp10 std1h

<sup>1</sup>H NMR (CDCl<sub>3</sub>, 400 MHz)  
 13

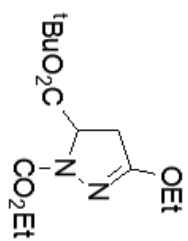

```

SAMPLE          DEC. & VT
date   Mar 27 2012   dfcrg   399.956
solvent CDCl3      dn       H1
file   /export/home/~ dpwr   20
vnmr1/vnmr1s/data- dof     0
/takebayashi17/deco- dm    mmn
2Pyr3D.h.fid   dm      c
ACQUISITION
sfrcg   399.956   dmf     200
tn      H1 dres   1.0
at      3.744   homo    n
np      44928   wtfile   PROCESSING
sw      6000.6   f         ft
fb      not used proc   f
bs      1      fn       not used
epwr    61     match    f
pw      5.5
dl      1.256   werr     react
tof     600.0   wearp    procploc
nt      16     wbs
ct      16     wnt
alock   not used
gain    not used
FLAGS
l1      n
l1n    n
dp      Y
hs      mn
DISPLAY
sp      -80.0
wp      4079.4
vs      214
sc      0
wc      380
hzmm    10.74
ls      666.62
rf1     377.8
rfp     0
th      7
fns     100.000
nm      ph
    
```

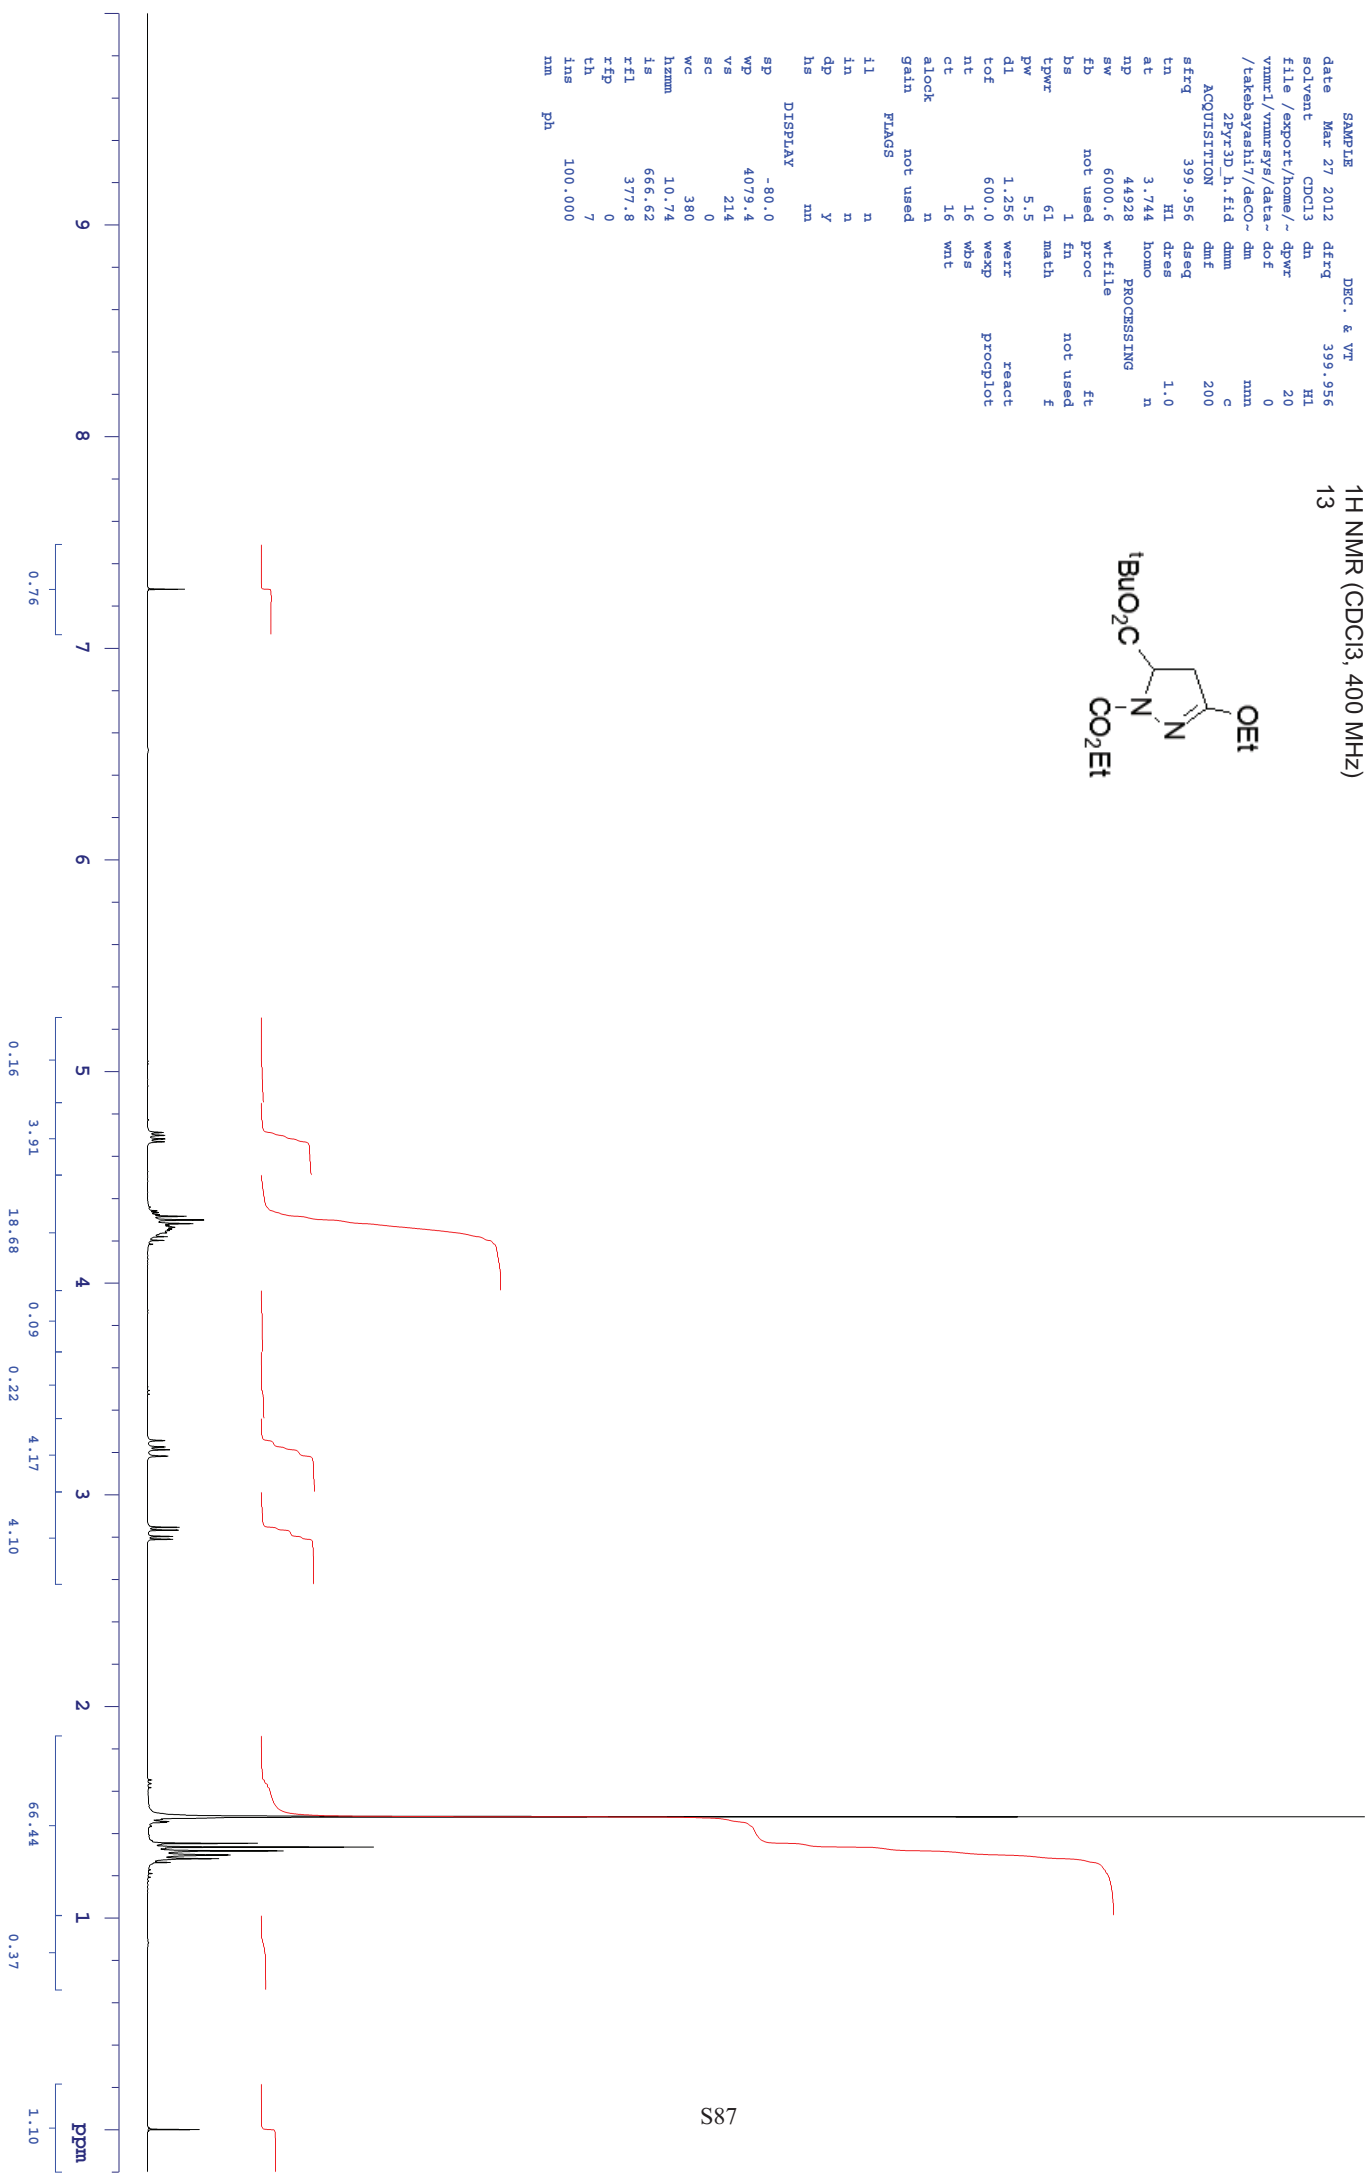

takebayashi7/deco2Pyr3D  
 exp10 sfd13c

13C NMR (CDCl3, 100.6 MHz)  
 13

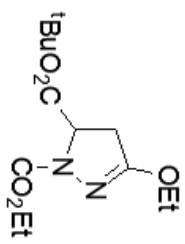

```

SAMPLE          DEC. & VT
date   Mar 27 2012   dfcrg   399.956
solvent CDCl3        dn      H1
file   /export/home/~ dpwr   41
vnmr1/vnmr1s/data- dof     0
/takebayashi7/deco- dm
2Pyr3Dc_c.fid  dm
ACQUISITION
dfcrg   100.579   dmf     11088
tn      C13      dresq   garp1
at      1.199   homo    n
ap      59968   PROCESSING
sw      25000.0 lb      1.00
fb      not used wfile
bs      16      proc    ft
cpwr    56      fn      not used
pw      5.0     math    f
dl      0.801
tof     1000.0   werr   react
nt      8192    wep    procp1ot
ct      8192    wbs
alock   not used n   wnt
gain    not used
FLAGS
f1      n
f2      n
f3      n
f4      n
f5      n
f6      n
f7      n
f8      n
f9      n
f10     n
f11     n
f12     n
f13     n
f14     n
f15     n
f16     n
f17     n
f18     n
f19     n
f20     n
f21     n
f22     n
f23     n
f24     n
f25     n
f26     n
f27     n
f28     n
f29     n
f30     n
f31     n
f32     n
f33     n
f34     n
f35     n
f36     n
f37     n
f38     n
f39     n
f40     n
f41     n
f42     n
f43     n
f44     n
f45     n
f46     n
f47     n
f48     n
f49     n
f50     n
f51     n
f52     n
f53     n
f54     n
f55     n
f56     n
f57     n
f58     n
f59     n
f60     n
f61     n
f62     n
f63     n
f64     n
f65     n
f66     n
f67     n
f68     n
f69     n
f70     n
f71     n
f72     n
f73     n
f74     n
f75     n
f76     n
f77     n
f78     n
f79     n
f80     n
f81     n
f82     n
f83     n
f84     n
f85     n
f86     n
f87     n
f88     n
f89     n
f90     n
f91     n
f92     n
f93     n
f94     n
f95     n
f96     n
f97     n
f98     n
f99     n
f100    n
f101    n
f102    n
f103    n
f104    n
f105    n
f106    n
f107    n
f108    n
f109    n
f110    n
f111    n
f112    n
f113    n
f114    n
f115    n
f116    n
f117    n
f118    n
f119    n
f120    n
f121    n
f122    n
f123    n
f124    n
f125    n
f126    n
f127    n
f128    n
f129    n
f130    n
f131    n
f132    n
f133    n
f134    n
f135    n
f136    n
f137    n
f138    n
f139    n
f140    n
f141    n
f142    n
f143    n
f144    n
f145    n
f146    n
f147    n
f148    n
f149    n
f150    n
f151    n
f152    n
f153    n
f154    n
f155    n
f156    n
f157    n
f158    n
f159    n
f160    n
f161    n
f162    n
f163    n
f164    n
f165    n
f166    n
f167    n
f168    n
f169    n
f170    n
f171    n
f172    n
f173    n
f174    n
f175    n
f176    n
f177    n
f178    n
f179    n
f180    n
f181    n
f182    n
f183    n
f184    n
f185    n
f186    n
f187    n
f188    n
f189    n
f190    n
f191    n
f192    n
f193    n
f194    n
f195    n
f196    n
f197    n
f198    n
f199    n
f200    n
f201    n
f202    n
f203    n
f204    n
f205    n
f206    n
f207    n
f208    n
f209    n
f210    n
f211    n
f212    n
f213    n
f214    n
f215    n
f216    n
f217    n
f218    n
f219    n
f220    n
f221    n
f222    n
f223    n
f224    n
f225    n
f226    n
f227    n
f228    n
f229    n
f230    n
f231    n
f232    n
f233    n
f234    n
f235    n
f236    n
f237    n
f238    n
f239    n
f240    n
f241    n
f242    n
f243    n
f244    n
f245    n
f246    n
f247    n
f248    n
f249    n
f250    n
f251    n
f252    n
f253    n
f254    n
f255    n
f256    n
f257    n
f258    n
f259    n
f260    n
f261    n
f262    n
f263    n
f264    n
f265    n
f266    n
f267    n
f268    n
f269    n
f270    n
f271    n
f272    n
f273    n
f274    n
f275    n
f276    n
f277    n
f278    n
f279    n
f280    n
f281    n
f282    n
f283    n
f284    n
f285    n
f286    n
f287    n
f288    n
f289    n
f290    n
f291    n
f292    n
f293    n
f294    n
f295    n
f296    n
f297    n
f298    n
f299    n
f300    n
f301    n
f302    n
f303    n
f304    n
f305    n
f306    n
f307    n
f308    n
f309    n
f310    n
f311    n
f312    n
f313    n
f314    n
f315    n
f316    n
f317    n
f318    n
f319    n
f320    n
f321    n
f322    n
f323    n
f324    n
f325    n
f326    n
f327    n
f328    n
f329    n
f330    n
f331    n
f332    n
f333    n
f334    n
f335    n
f336    n
f337    n
f338    n
f339    n
f340    n
f341    n
f342    n
f343    n
f344    n
f345    n
f346    n
f347    n
f348    n
f349    n
f350    n
f351    n
f352    n
f353    n
f354    n
f355    n
f356    n
f357    n
f358    n
f359    n
f360    n
f361    n
f362    n
f363    n
f364    n
f365    n
f366    n
f367    n
f368    n
f369    n
f370    n
f371    n
f372    n
f373    n
f374    n
f375    n
f376    n
f377    n
f378    n
f379    n
f380    n
f381    n
f382    n
f383    n
f384    n
f385    n
f386    n
f387    n
f388    n
f389    n
f390    n
f391    n
f392    n
f393    n
f394    n
f395    n
f396    n
f397    n
f398    n
f399    n
f400    n
f401    n
f402    n
f403    n
f404    n
f405    n
f406    n
f407    n
f408    n
f409    n
f410    n
f411    n
f412    n
f413    n
f414    n
f415    n
f416    n
f417    n
f418    n
f419    n
f420    n
f421    n
f422    n
f423    n
f424    n
f425    n
f426    n
f427    n
f428    n
f429    n
f430    n
f431    n
f432    n
f433    n
f434    n
f435    n
f436    n
f437    n
f438    n
f439    n
f440    n
f441    n
f442    n
f443    n
f444    n
f445    n
f446    n
f447    n
f448    n
f449    n
f450    n
f451    n
f452    n
f453    n
f454    n
f455    n
f456    n
f457    n
f458    n
f459    n
f460    n
f461    n
f462    n
f463    n
f464    n
f465    n
f466    n
f467    n
f468    n
f469    n
f470    n
f471    n
f472    n
f473    n
f474    n
f475    n
f476    n
f477    n
f478    n
f479    n
f480    n
f481    n
f482    n
f483    n
f484    n
f485    n
f486    n
f487    n
f488    n
f489    n
f490    n
f491    n
f492    n
f493    n
f494    n
f495    n
f496    n
f497    n
f498    n
f499    n
f500    n
    
```



Supplement: c2ra21249h.pdf [file c2ra21249h.pdf]
